# Supplementary material for: Regioselective electrochemical cascade C–H sulfonylation–bromination of indolizines to access difunctionalized indolizines
Source: Royal Society of Chemistry journal article supplement (doi:10.1039/d4qo00035h), 2024-01-01
Supplement: d4qo00035h1.pdf [file d4qo00035h1.pdf]

Supporting Information for

**Regioselective electrochemical cascade C-H sulfonylation-bromination of indolizines to access difunctionalized indolizines**

Wenxuan Jiang, Xiang Liu\*, Chuanying Zhu, Meiyi Chen, Weidan Li, Hua Cao\*

*School of Chemistry and Chemical Engineering, Guangdong Pharmaceutical University, Zhongshan 528458, P. R. of China*

E-mail: liux96@gdpu.edu.cn; caohua@gdpu.edu.cn

**Table of Contents:**

---

|                                                      |      |
|------------------------------------------------------|------|
| 1. General considerations                            | S-2  |
| 2. Experimental procedures and characterization data | S-3  |
| 2.1 <i>Experimental procedures</i>                   | S-3  |
| 2.2 <i>Characterization data</i>                     | S-5  |
| 3. NMR spectra for new compounds                     | S-16 |
| 4. X-ray crystallographic data                       | S-47 |
| 5. References                                        | S-49 |

---

## 1. General considerations

Unless otherwise noted, commercial reagents were purchased from Adamas, Alfa, Aladdin, TCI, *J&K* or Macklin and used without further purification. All reactions were carried out using oven-dried glassware and all reactions proceeded without special care. Column chromatography was performed on 200-300 mesh silica gel (Huanghai, China).

$^1\text{H}$ ,  $^{19}\text{F}$  and  $^{13}\text{C}\{^1\text{H}\}$  NMR spectra were recorded on an Bruker Ascend 400 MHz spectrometer at ambient temperature.  $^1\text{H}$  NMR spectra are referred to the TMS signal ( $\delta = 0$  ppm) and  $^{13}\text{C}$  NMR spectra are referred to the residual solvent signal ( $\delta = 77.16$  ppm). Data for  $^1\text{H}$  NMR are reported as follows: chemical shifts ( $\delta$  ppm), multiplicities (s = singlet, d = doublet, t = triplet, q = quartet, m = multiplet, br = broad), coupling constants (Hz), integration.

The instrument for electrolysis is ElectraSyn 2.0 Package (IKA), the anode electrode is vitreous carbon plate (52 mm $\times$ 8 mm $\times$ 2 mm) and cathodic electrode was platinum plate (52 mm $\times$ 8 mm $\times$ 2 mm); And MS-3610DS (MAISHENG), carbon plate (10 mm $\times$ 10 mm $\times$ 3 mm) and cathodic electrode was platinum plate (10 mm $\times$ 10 mm $\times$ 0.1 mm). The data of HRMS was carried out on Agilent 7250 GC/QTOF. Melting point were recorded using a SGW X-4 Melting Point Apparatus. X-ray diffraction data were collected on SuperNova, Dual, Cu at zero, AtlasS2.

## 2. Experimental procedures and characterization data

### 2.1 Experimental procedures

Synthesis of compounds **1** according to the following procedure<sup>1</sup>:

As exemplified for **1a**:

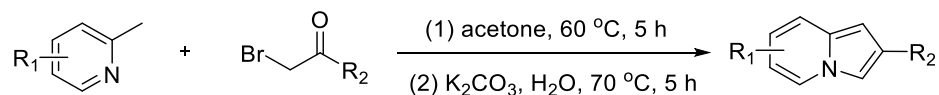

A solution of 2-picoline (0.93 g, 10 mmol, 1.0 equiv) and 2-bromoacetophenone (1.99 g, 10 mmol, 1.0 equiv) in acetone (50 mL) were added to a 100 mL round bottom flask and heated with a heating mantle for 5 hours to 60 °C. The precipitate obtained by filtration separation was redissolved in 20 mL of hot water (60 °C). Then, K<sub>2</sub>CO<sub>3</sub> (2.76 g, 20 mmol, 2.0 equiv) was added and heated at 60 °C for 5 hours. After filtration and drying in vacuo, a white solid compound **1a** was obtained without further purification.

#### 2-Phenylindolizine (**1a**)

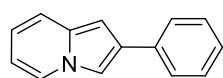

<sup>1</sup>H NMR (400 MHz, CDCl<sub>3</sub>) δ 7.89 (d, *J* = 7.0 Hz, 1H), 7.67 (d, *J* = 7.2 Hz, 2H), 7.58 (s, 1H), 7.40 (t, *J* = 7.7 Hz, 2H), 7.35 (d, *J* = 9.0 Hz, 1H), 7.29-7.23 (m, 1H), 6.70 (s, 1H), 6.68-6.60 (m, 1H), 6.45 (t, *J* = 6.5 Hz, 1H). <sup>13</sup>C NMR (100 MHz, CDCl<sub>3</sub>) δ 135.3, 133.6, 129.4, 128.7, 126.5, 126.2, 125.0, 119.0, 117.3, 110.5, 109.2, 96.6.

Indolizine derivatives **1** were known compounds and synthesized according to the known procedures, and their NMR data were in agreement with those described in the literature.<sup>1,2</sup>

Synthesis of products **3** and **4** according to the following procedure:

As exemplified for **3a**:

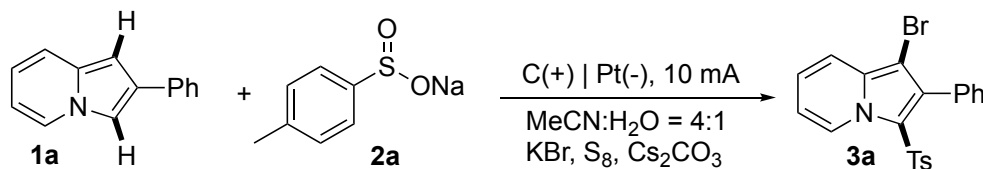

2-Phenylindolizine (0.3 mmol, 1.0 equiv), Sodium *p*-tolylsulfinate (0.6 mmol, 2 equiv), KBr (1.2 mmol), Cs<sub>2</sub>CO<sub>3</sub> (0.3 mmol), S<sub>8</sub> (0.75 mmol, 2.5 equiv), CH<sub>3</sub>CN (4 mL) and H<sub>2</sub>O (1 mL) were placed in a 10 mL undivided electrolytic cell with a vitreous carbon plate anode (52 mm×8 mm×2 mm) and a platinum plate cathode (52 mm×8 mm×2 mm). The electrolysis was carried out at room temperature under a constant current of 10 mA for 10 hours. Then, the resulting solution was quenched with 10 mL brine and extracted

with ethyl acetate (3×10 mL). The extract was dried with Na<sub>2</sub>SO<sub>4</sub>. The solvent was removed with a rotary evaporator. The pure product **3a** was obtained by preparative TLC on silica gel (petroleum ether: ethyl acetate = 8: 1).

### Synthesis of products **6** and **7** according to the following procedure:

As exemplified for **6a**:

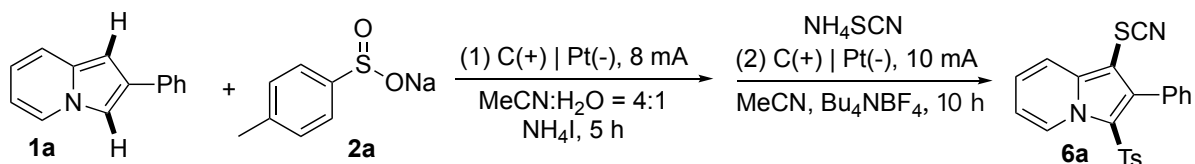

2-Phenylindolizine (0.5 mmol, 1.0 equiv), Sodium *p*-tolylsulfinate (1.0 mmol, 2 equiv), NH<sub>4</sub>I (2.0 mmol, 4 equiv), CH<sub>3</sub>CN (4 mL) and H<sub>2</sub>O (1 mL) were placed in a 10 mL undivided electrolytic cell with a vitreous carbon plate anode (52 mm×8 mm×2 mm) and a platinum plate cathode (52 mm×8 mm×2 mm). The electrolysis was carried out at room temperature under a constant current of 8 mA for 5 hours. Then, the resulting solution was quenched with 10 mL brine and extracted with ethyl acetate (3×10 mL). The extract was dried with Na<sub>2</sub>SO<sub>4</sub>. The solvent was removed with a rotary evaporator. The pure product **5a** was obtained by preparative TLC on silica gel (petroleum ether: ethyl acetate = 8: 1).

**5a** (0.2 mmol, 1.0 equiv), NH<sub>4</sub>SCN (0.6 mmol, 3 equiv), Bu<sub>4</sub>NBF<sub>4</sub> (0.8 mmol), and CH<sub>3</sub>CN (5 mL) were placed in a 10 mL undivided electrolytic cell with a vitreous carbon plate anode (52 mm×8 mm×2 mm) and a platinum plate cathode (52 mm×8 mm×2 mm). The electrolysis was carried out at room temperature under a constant current of 10 mA for 10 hours. Then, the resulting solution was quenched with 10 mL brine and extracted with ethyl acetate (3×10 mL). The extract was dried with Na<sub>2</sub>SO<sub>4</sub>. The solvent was removed with a rotary evaporator. The pure product **6a** was obtained by preparative TLC on silica gel (petroleum ether: ethyl acetate = 4: 1).

### General procedure for cyclic voltammetry

Cyclic voltammetry was performed in a three-electrode cell connected to a schlenk line under nitrogen at room temperature. The working electrode was a steady vitreous carbon plate electrode, the counter electrode was a platinum plate. The reference was an Ag/AgCl electrode submerged in saturated aqueous KCl solution, and separated from reaction by a salt bridge. Then 10 mL electrolyte solution containing 0.05 M n-Bu<sub>4</sub>NPF<sub>6</sub>

the mixed solvent of MeCN and H<sub>2</sub>O was poured into electrochemical cell. The concentration of samples was 0.01 M. The scan rate was 0.1 V/s, ranging from 0 V to 2.0 V.

## 2.2 Characterization data

### 1-Bromo-2-phenyl-3-tosylindolizine (3a)

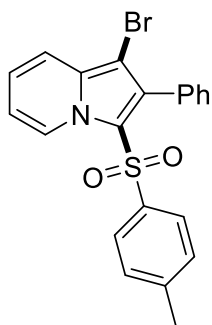

Preparative TLC on silica gel (eluent: PE/EA = 8/1, v/v) to afford **3a**. Yellow solid (82.9 mg, 65%), mp 135.2-136.0 °C. <sup>1</sup>H NMR (400 MHz, CDCl<sub>3</sub>) δ 9.18 (d, *J* = 7.2 Hz, 1H), 7.54 (d, *J* = 8.9 Hz, 1H), 7.45 (d, *J* = 7.1 Hz, 5H), 7.37 – 7.31 (m, 2H), 7.14 (t, *J* = 9.1 Hz, 3H), 6.87 (t, *J* = 7.0 Hz, 1H), 2.33 (s, 3H). <sup>13</sup>C NMR (101 MHz, CDCl<sub>3</sub>) δ 143.9, 139.4, 135.6, 134.0, 131.8, 130.9, 129.5, 128.3, 127.5, 126.3, 125.9, 123.3, 117.8, 116.5, 113.9, 91.7, 21.5. HRMS (GC/QTOF)

m/z: [M]<sup>+</sup> calcd for C<sub>21</sub>H<sub>16</sub>BrNO<sub>2</sub>S, 425.0085; found 425.0076.

### 1-Bromo-7-methyl-2-phenyl-3-tosylindolizine (3b)

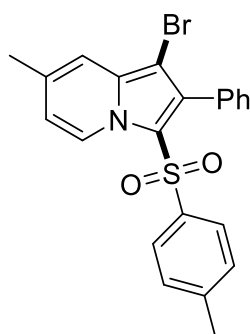

Preparative TLC on silica gel (eluent: PE/EA = 8/1, v/v) to afford **3b**. Green solid (60.6 mg, 46%), mp 132.6-133.5 °C. <sup>1</sup>H NMR (400 MHz, CDCl<sub>3</sub>) δ 9.06 (d, *J* = 7.3 Hz, 1H), 7.47 – 7.40 (m, 5H), 7.36 – 7.31 (m, 2H), 7.29 (s, 1H), 7.12 (d, *J* = 8.1 Hz, 2H), 6.70 (d, *J* = 6.3 Hz, 1H), 2.39 (s, 3H), 2.33 (s, 3H). <sup>13</sup>C NMR (101 MHz, CDCl<sub>3</sub>) δ 177.3, 177.1, 143.8, 141.2, 139.8, 134.6, 132.1, 131.1, 129.6, 128.4, 127.6, 126.3, 125.5, 116.7, 116.2, 21.6, 21.2. HRMS (GC/QTOF) m/z: [M]<sup>+</sup> calcd

for C<sub>22</sub>H<sub>18</sub>BrNO<sub>2</sub>S, 439.0242; found 439.0247.

### 1-Bromo-7-methoxy-2-phenyl-3-tosylindolizine (3c)

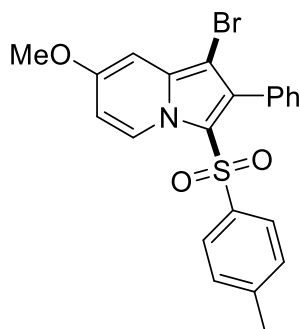

Preparative TLC on silica gel (eluent: PE/EA = 8/1, v/v) to afford **3c**. Green solid (49.1 mg, 36%), mp 136.6-137.3 °C. <sup>1</sup>H NMR (400 MHz, CDCl<sub>3</sub>) δ 9.04 (d, *J* = 7.6 Hz, 1H), 7.46 – 7.42 (m, 4H), 7.40 (s, 1H), 7.36 – 7.32 (m, 2H), 7.11 (d, *J* = 8.0 Hz, 2H), 6.72 (s, 1H), 6.58 (d, *J* = 6.4 Hz, 1H), 3.89 (s, 3H), 2.33 (s, 3H). <sup>13</sup>C NMR (101 MHz, CDCl<sub>3</sub>) δ 143.7, 137.5, 132.1, 131.1, 131.0, 129.9, 129.6, 129.6, 128.7, 128.4, 127.6, 127.6, 126.2, 108.9, 97.8, 94.7, 55.8, 21.6.

HRMS (GC/QTOF) m/z: [M]<sup>+</sup> calcd for C<sub>22</sub>H<sub>18</sub>BrNO<sub>3</sub>S, 455.0191; found 455.0196.

### 1-Bromo-8-methyl-2-phenyl-3-tosylindolizine (3d)

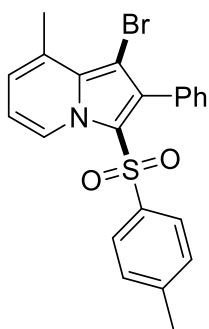

Preparative TLC on silica gel (eluent: PE/EA = 8/1, v/v) to afford **3d**. Green solid (63.2 mg, 48%), mp 134.7-135.5 °C. <sup>1</sup>H NMR (400 MHz, CDCl<sub>3</sub>) δ 9.06 (d, *J* = 7.2 Hz, 1H), 7.50 (s, 1H), 7.47 (s, 1H), 7.45 (d, *J* = 2.5 Hz, 2H), 7.44 (s, 1H), 7.30 (d, *J* = 2.3 Hz, 1H), 7.28 (d, *J* = 3.7 Hz, 1H), 7.16 (s, 1H), 7.14 (s, 1H), 6.82 (d, *J* = 6.9 Hz, 1H), 6.71 (t, *J* = 7.0 Hz, 1H), 2.79 (s, 3H), 2.34 (s, 3H). <sup>13</sup>C NMR (101 MHz, CDCl<sub>3</sub>) δ 144.0, 139.4, 136.3, 132.7, 131.0, 129.6, 129.3, 128.3, 127.6, 126.5, 124.2, 124.0, 116.9,

113.4, 100.0, 91.3, 21.6, 21.0. HRMS (GC/QTOF) *m/z*: [M]<sup>+</sup> calcd for C<sub>22</sub>H<sub>18</sub>BrNO<sub>2</sub>S, 439.0242; found 439.0250.

### 1,8-Dibromo-2-phenyl-3-tosylindolizine (3e)

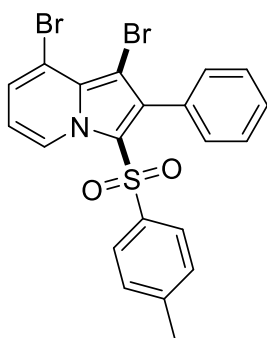

Preparative TLC on silica gel (eluent: PE/EA = 8/1, v/v) to afford **3e**. Green solid (69.3 mg, 46%), mp 140.7-141.5 °C. <sup>1</sup>H NMR (400 MHz, CDCl<sub>3</sub>) δ 9.24 (d, *J* = 7.2 Hz, 1H), 8.05 (d, *J* = 8.0 Hz, 1H), 7.45 (d, *J* = 7.2 Hz, 5H), 7.35 (d, *J* = 7.3 Hz, 1H), 7.24 (s, 1H), 7.15 (d, *J* = 8.1 Hz, 2H), 6.66 (t, *J* = 7.2 Hz, 1H), 2.35 (s, 3H). <sup>13</sup>C NMR (101 MHz, CDCl<sub>3</sub>) δ 144.4, 138.9, 137.5, 133.3, 132.2, 130.9, 129.7, 128.7, 128.5, 128.2, 127.9, 127.7, 126.6, 125.5, 113.2, 112.3, 21.7. HRMS (GC/QTOF) *m/z*: [M]<sup>+</sup> calcd for C<sub>21</sub>H<sub>15</sub>Br<sub>2</sub>NO<sub>2</sub>S, 502.9190; found 502.9189.

### 1-Bromo-6-ethyl-2-phenyl-3-tosylindolizine (3f)

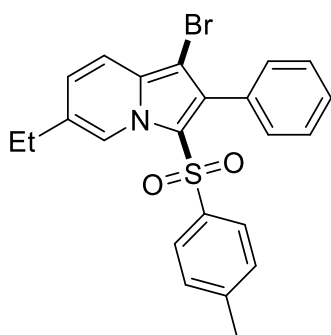

Preparative TLC on silica gel (eluent: PE/EA = 8/1, v/v) to afford **3f**. Yellow solid (82.9 mg, 61%), mp 139.2-140.0 °C. <sup>1</sup>H NMR (400 MHz, CDCl<sub>3</sub>) δ 8.97 (s, 1H), 7.48 (s, 1H), 7.45 (d, *J* = 7.3 Hz, 5H), 7.34 – 7.30 (m, 2H), 7.13 (d, *J* = 8.1 Hz, 2H), 7.05 (d, *J* = 9.1 Hz, 1H), 2.69 (q, *J* = 7.5 Hz, 2H), 2.33 (s, 3H), 1.30 (t, *J* = 7.5 Hz, 3H). <sup>13</sup>C NMR (101 MHz, CDCl<sub>3</sub>) δ 143.8, 139.6, 135.3, 133.3, 132.2, 131.1, 130.0, 129.5, 128.3, 127.6, 126.4, 125.6, 123.1,

117.4, 116.2, 91.4, 26.4, 21.6, 15.2. HRMS (GC/QTOF) *m/z*: [M]<sup>+</sup> calcd for C<sub>23</sub>H<sub>20</sub>BrNO<sub>2</sub>S, 453.0398; found 453.0395.

### 1-Bromo-2-(2-fluorophenyl)-3-tosylindolizine (3g)

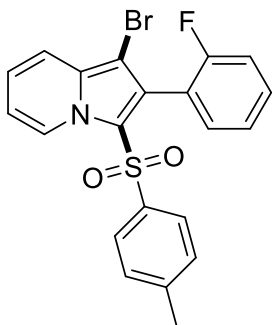

Preparative TLC on silica gel (eluent: PE/EA = 8/1, v/v) to afford **3g**. Green solid (83.5 mg, 63%), mp 143.5-144.1 °C. <sup>1</sup>H NMR (400 MHz, CDCl<sub>3</sub>) δ 9.01 (d, *J* = 7.2 Hz, 1H), 7.56 (t, *J* = 9.4 Hz, 3H), 7.51 – 7.43 (m, 1H), 7.36 (t, *J* = 7.2 Hz, 1H), 7.28 (d, *J* = 8.2 Hz, 1H), 7.21 – 7.10 (m, 4H), 6.86 (t, *J* = 6.8 Hz, 1H), 2.35 (s, 3H). <sup>13</sup>C NMR (101 MHz, CDCl<sub>3</sub>) δ 161.4, 158.9, 144.2, 139.0, 134.2, 133.2, 130.7 (d, *J* = 8.0 Hz), 129.7, 129.5, 126.5, 125.7, 123.5 (d, *J* = 3.5 Hz),

123.3, 120.1 (d, *J* = 15.9 Hz), 118.0, 116.9, 115.4 (d, *J* = 21.7 Hz), 114.1, 21.6. <sup>19</sup>F NMR (376 MHz, CDCl<sub>3</sub>) δ -112.37 – -112.49 (m). HRMS (GC/QTOF) *m/z*: [M]<sup>+</sup> calcd for C<sub>21</sub>H<sub>15</sub>BrFNO<sub>2</sub>S, 442.9991; 442.9988.

#### 4-(1-Bromo-3-tosylindolizin-2-yl)benzonitrile (3h)

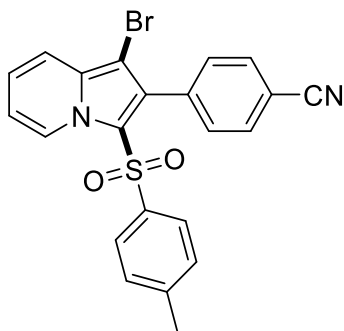

Preparative TLC on silica gel (eluent: PE/EA = 8/1, v/v) to afford **3h**. Green solid (105.3 mg, 78%), mp 136.8-137.1 °C. <sup>1</sup>H NMR (400 MHz, CDCl<sub>3</sub>) δ 9.11 (d, *J* = 7.2 Hz, 1H), 7.75 (d, *J* = 8.0 Hz, 2H), 7.56 (d, *J* = 9.0 Hz, 1H), 7.52 – 7.43 (m, 4H), 7.19 (t, *J* = 8.3 Hz, 3H), 6.93 (t, *J* = 7.0 Hz, 1H), 2.35 (s, 3H). <sup>13</sup>C NMR (101 MHz, CDCl<sub>3</sub>) δ 144.5, 139.0, 137.1, 134.3, 133.4, 131.9, 131.4, 129.8, 126.2, 125.8, 123.9, 118.9, 118.1, 116.6, 114.6, 112.2, 91.3, 21.6. HRMS (GC/QTOF) *m/z*: [M]<sup>+</sup> calcd for

C<sub>22</sub>H<sub>15</sub>BrN<sub>2</sub>O<sub>2</sub>S, 450.0038; found 450.0043.

#### 1-Bromo-2-(4-methoxyphenyl)-3-tosylindolizine (3i)

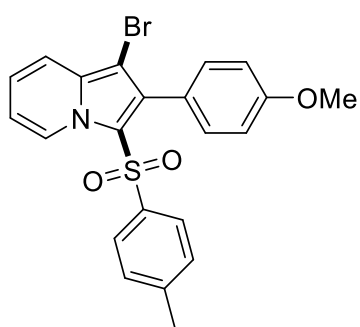

Preparative TLC on silica gel (eluent: PE/EA = 8/1, v/v) to afford **3i**. Green solid (95.6 mg, 70%), mp 139.5-140.4 °C. <sup>1</sup>H NMR (400 MHz, CDCl<sub>3</sub>) δ 9.17 (d, *J* = 7.2 Hz, 1H), 7.53 (d, *J* = 8.9 Hz, 1H), 7.44 (d, *J* = 8.2 Hz, 2H), 7.28 (d, *J* = 8.5 Hz, 2H), 7.16 – 7.10 (m, 3H), 6.99 (d, *J* = 8.5 Hz, 2H), 6.85 (t, *J* = 6.9 Hz, 1H), 3.89 (s, 3H), 2.33 (s, 3H). <sup>13</sup>C

NMR (101 MHz, CDCl<sub>3</sub>) δ 159.7, 143.9, 139.6, 135.5, 134.1, 132.4, 129.6, 126.3, 126.1, 124.0, 123.4, 117.9, 116.5, 113.9, 113.1, 92.0, 55.3, 21.6. HRMS (GC/QTOF) *m/z*: [M]<sup>+</sup> calcd for C<sub>22</sub>H<sub>18</sub>BrNO<sub>3</sub>S, 455.0191; found 455.0183.

#### 1-Bromo-2-(4-fluorophenyl)-3-tosylindolizine (3j)

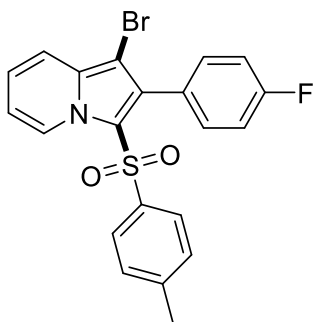

Preparative TLC on silica gel (eluent: PE/EA = 8/1, v/v) to afford **3j**. Green solid (75.6 mg, 57%), mp 139.2-140.0 °C. <sup>1</sup>H NMR (400 MHz, CDCl<sub>3</sub>) δ 9.17 (d, *J* = 7.2 Hz, 1H), 7.61 (q, *J* = 8.4, 5.5 Hz, 1H), 7.54 (d, *J* = 9.0 Hz, 1H), 7.44 (d, *J* = 8.2 Hz, 2H), 7.35 – 7.29 (m, 2H), 7.16 – 7.12 (m, 3H), 7.08 (t, *J* = 8.6 Hz, 1H), 6.88 (t, *J* = 7.0 Hz, 1H), 2.34 (s, 3H). <sup>13</sup>C NMR (101 MHz, CDCl<sub>3</sub>) δ 164.2, 161.7, 144.1, 139.4, 134.6, 134.1, 132.9 (d, *J* = 8.2 Hz), 129.7, 127.8 (d, *J* = 3.3 Hz), 126.3, 126.0, 123.6, 118.0, 114.8, 114.6, 114.1, 21.6. <sup>19</sup>F NMR (376 MHz, CDCl<sub>3</sub>) δ -113.28. HRMS (GC/QTOF) *m/z*: [M]<sup>+</sup> calcd for C<sub>21</sub>H<sub>15</sub>BrFNO<sub>2</sub>S, 442.9991; found 442.9992.

### 1-Bromo-2-(4-chlorophenyl)-3-tosylindolizine (3k)

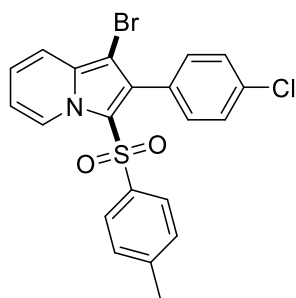

Preparative TLC on silica gel (eluent: PE/EA = 8/1, v/v) to afford **3k**. Green solid (71.4 mg, 52%), mp 138.4-139.2 °C. <sup>1</sup>H NMR (400 MHz, CDCl<sub>3</sub>) δ 9.15 (d, *J* = 7.2 Hz, 1H), 7.54 (d, *J* = 9.0 Hz, 1H), 7.48 – 7.40 (m, 4H), 7.28 (d, *J* = 8.3 Hz, 2H), 7.16 (t, *J* = 6.5 Hz, 3H), 6.89 (t, *J* = 7.0 Hz, 1H), 2.34 (s, 3H). <sup>13</sup>C NMR (101 MHz, CDCl<sub>3</sub>) δ 144.2, 139.4, 134.6, 134.4, 134.2, 132.4, 130.4, 129.7, 127.9, 126.3, 126.0, 123.6, 118.0, 116.7, 114.2, 91.7, 21.6. HRMS (GC/QTOF) *m/z*: [M]<sup>+</sup> calcd for C<sub>21</sub>H<sub>15</sub>BrClNO<sub>2</sub>S, 458.9695; found 458.9698.

### 1-Bromo-2-(3-fluorophenyl)-3-tosylindolizine (3l)

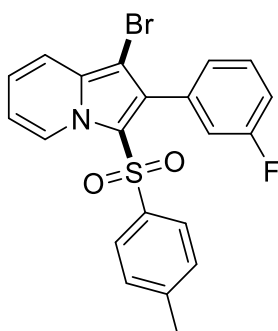

Preparative TLC on silica gel (eluent: PE/EA = 8/1, v/v) to afford **3l**. Red solid (55.7 mg, 42%), mp 136.3-137.0 °C. <sup>1</sup>H NMR (400 MHz, CDCl<sub>3</sub>) δ 9.16 (d, *J* = 7.2 Hz, 1H), 7.55 (d, *J* = 9.0 Hz, 1H), 7.48 (d, *J* = 8.0 Hz, 2H), 7.45 – 7.37 (m, 1H), 7.15 (t, *J* = 8.0 Hz, 5H), 7.00 (d, *J* = 9.5 Hz, 1H), 6.89 (t, *J* = 7.0 Hz, 1H), 2.35 (s, 3H). <sup>13</sup>C NMR (101 MHz, CDCl<sub>3</sub>) δ 163.3, 160.8, 144.2, 139.3, 134.1, 129.7, 129.1 (d, *J* = 8.5 Hz), 127.0 (d, *J* = 3.0 Hz), 126.4, 126.2, 126.0, 123.6, 118.0, 115.5, 115.3, 114.2, 104.3, 91.6, 21.6. HRMS (GC/QTOF) *m/z*: [M]<sup>+</sup> calcd for C<sub>21</sub>H<sub>15</sub>BrFNO<sub>2</sub>S, 442.9991; found 442.9983.

### 1-Bromo-2-(3-chlorophenyl)-3-tosylindolizine (3m)



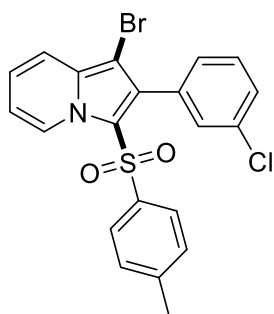

Preparative TLC on silica gel (eluent: PE/EA = 8/1, v/v) to afford **3m**. Green solid (72.8 mg, 53%), mp 139.3-140.2 °C. <sup>1</sup>H NMR (400 MHz, CDCl<sub>3</sub>) δ 9.18 (d, *J* = 7.2 Hz, 1H), 7.55 (d, *J* = 9.9 Hz, 1H), 7.49 – 7.35 (m, 5H), 7.17 (q, *J* = 7.0, 5.5 Hz, 4H), 6.90 (t, *J* = 7.0 Hz, 1H), 2.36 (s, 3H). <sup>13</sup>C NMR (101 MHz, CDCl<sub>3</sub>) δ 144.3, 139.3, 134.1, 134.0, 133.8, 133.5, 130.8, 129.7, 129.4, 128.9, 128.6, 126.4, 126.0, 123.6, 118.0, 116.9, 114.2, 91.5, 21.6. HRMS (GC/QTOF) *m/z*:

[M]<sup>+</sup> calcd for C<sub>21</sub>H<sub>15</sub>BrClNO<sub>2</sub>S, 458.9695; found 458.9687.

### 1-Bromo-2-(3-bromophenyl)-3-(4-methylphenyl)sulfonylindolizine (3n)

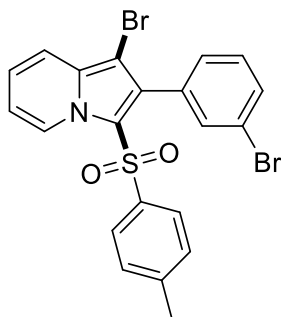

Preparative TLC on silica gel (eluent: PE/EA = 8/1, v/v) to afford **3n**. Green solid (87.3 mg, 58%), mp 132.3-133.1 °C. <sup>1</sup>H NMR (400 MHz, CDCl<sub>3</sub>) δ 9.19 (d, *J* = 7.2 Hz, 1H), 7.58 (d, *J* = 6.4 Hz, 1H), 7.54 (d, *J* = 8.9 Hz, 1H), 7.46 (d, *J* = 8.2 Hz, 2H), 7.32 (d, *J* = 2.9 Hz, 3H), 7.17 (d, *J* = 7.9 Hz, 3H), 6.90 (t, *J* = 7.0 Hz, 1H), 2.36 (s, 3H). <sup>13</sup>C NMR (101 MHz, CDCl<sub>3</sub>) δ 144.3, 139.3, 134.0, 133.8, 133.6, 131.4, 129.9, 129.7, 129.7, 129.2, 126.4, 126.1, 123.6, 121.5, 118.0,

117.2, 114.3, 91.6, 21.7. HRMS (GC/QTOF) *m/z*: [M]<sup>+</sup> calcd for C<sub>21</sub>H<sub>15</sub>Br<sub>2</sub>NO<sub>2</sub>S, 502.9190; found 502.9182.

### 1-Bromo-2-(3,4-difluorophenyl)-3-(4-methylphenyl)sulfonylindolizine (3o)

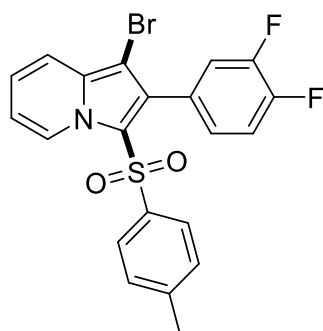

Preparative TLC on silica gel (eluent: PE/EA = 8/1, v/v) to afford **3o**. Green solid (91.1 mg, 66%), mp 109.6-110.2 °C. <sup>1</sup>H NMR (400 MHz, CDCl<sub>3</sub>) δ 9.15 (d, *J* = 7.2 Hz, 1H), 7.54 (d, *J* = 9.0 Hz, 1H), 7.48 (d, *J* = 8.2 Hz, 2H), 7.24 (d, *J* = 10.2 Hz, 1H), 7.19 – 7.12 (m, 4H), 7.11 – 7.06 (m, 1H), 6.90 (t, *J* = 7.0 Hz, 1H), 2.35 (s, 3H). <sup>13</sup>C NMR (101 MHz, CDCl<sub>3</sub>) δ 151.8 (d, *J* = 7.8 Hz), 150.8 (d, *J* = 11.5 Hz), 149.3 (d, *J* = 7.7 Hz), 148.4 (d, *J* = 11.2 Hz),

144.4, 139.3, 134.1, 133.3, 129.8, 127.6 (dd, *J* = 6.2, 3.7 Hz), 126.3, 126.0, 123.7, 120.2 (d, *J* = 17.9 Hz), 118.1, 116.6 (d, *J* = 18.0 Hz), 114.4, 91.7, 21.6. <sup>19</sup>F NMR (376 MHz, CDCl<sub>3</sub>) δ -137.81 – -137.98 (m), -138.26 – -138.42 (m). HRMS (GC/QTOF) *m/z*: [M]<sup>+</sup> calcd for C<sub>21</sub>H<sub>14</sub>BrF<sub>2</sub>NO<sub>2</sub>S, 460.9897; found 460.9899.

### 1-Bromo-2-(4-chlorophenyl)-8-methyl-3-(4-methylphenyl)sulfonylindolizine (3p)

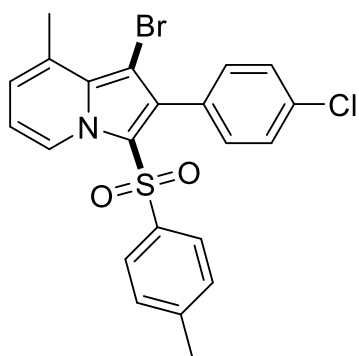

Preparative TLC on silica gel (eluent: PE/EA = 8/1, v/v) to afford **3p**.

Green solid (80.7 mg, 57%), mp 116.3-117.1 °C. <sup>1</sup>H NMR (400 MHz, CDCl<sub>3</sub>) δ 9.04 (d, *J* = 7.1 Hz, 1H), 7.49 (d, *J* = 8.2 Hz, 2H), 7.42 (d, *J* = 8.3 Hz, 2H), 7.24 (d, *J* = 8.3 Hz, 2H), 7.17 (d, *J* = 8.1 Hz, 2H), 6.83 (d, *J* = 6.8 Hz, 1H), 6.72 (t, *J* = 7.1 Hz, 1H), 2.79 (s, 3H), 2.35 (s, 3H). <sup>13</sup>C NMR (101 MHz, CDCl<sub>3</sub>) δ 144.2, 139.2, 135.0, 134.5, 132.9, 132.4, 131.9, 131.2, 129.7, 129.6, 129.4, 127.9, 127.8, 126.4, 124.2, 113.7, 21.6,

20.9. HRMS (GC/QTOF) *m/z*: [M]<sup>+</sup> calcd for C<sub>22</sub>H<sub>17</sub>BrClNO<sub>2</sub>S, 472.9852; found 472.9858.

### 1-Bromo-6-ethyl-2-(4-fluorophenyl)-3-tosylindolizine (3q)

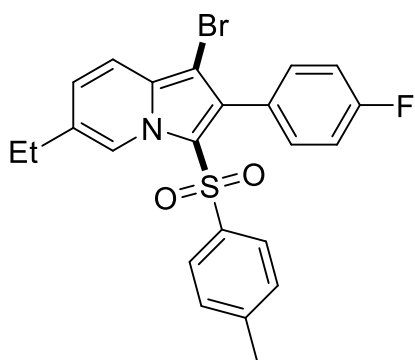

Preparative TLC on silica gel (eluent: PE/EA = 8/1, v/v) to afford

**3q**. Green solid (79.1 mg, 56%), mp 110.1-110.8 °C. <sup>1</sup>H NMR (400 MHz, CDCl<sub>3</sub>) δ 8.97 (s, 1H), 7.48 – 7.41 (m, 3H), 7.34 – 7.28 (m, 2H), 7.16 – 7.12 (m, 4H), 7.06 (d, *J* = 9.1 Hz, 1H), 2.69 (q, *J* = 7.5 Hz, 2H), 2.34 (s, 3H), 1.30 (t, *J* = 7.5 Hz, 3H). <sup>13</sup>C NMR (101 MHz, CDCl<sub>3</sub>) δ 144.0, 139.5, 136.6, 132.9, 132.9, 130.3, 129.6, 129.4, 128.0, 127.7, 126.3, 125.8, 123.1, 117.4, 114.8, 114.6, 26.4, 21.6,

15.2. <sup>19</sup>F NMR (376 MHz, CDCl<sub>3</sub>) δ -113.50. HRMS (GC/QTOF) *m/z*: [M]<sup>+</sup> calcd for C<sub>23</sub>H<sub>19</sub>BrFNO<sub>2</sub>S, 471.0304; found 471.0303.

### 1-Bromo-6-ethyl-2-(3-fluorophenyl)-3-tosylindolizine (3r)

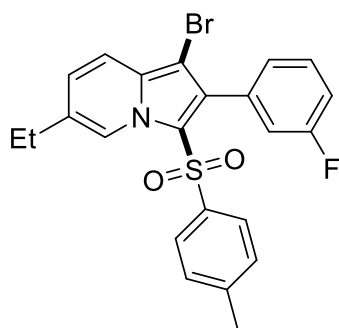

Preparative TLC on silica gel (eluent: PE/EA = 8/1, v/v) to afford **3r**. Green

solid (84.8 mg, 60%), mp 108.6-109.3 °C. <sup>1</sup>H NMR (400 MHz, CDCl<sub>3</sub>) δ 8.96 (s, 1H), 7.50 – 7.44 (m, 3H), 7.43 – 7.37 (m, 1H), 7.15 (t, *J* = 8.9 Hz, 4H), 7.06 (d, *J* = 9.1 Hz, 1H), 7.00 (d, *J* = 9.5 Hz, 1H), 2.70 (q, *J* = 7.5 Hz, 2H), 2.34 (s, 3H), 1.30 (t, *J* = 7.5 Hz, 3H). <sup>13</sup>C NMR (101 MHz, CDCl<sub>3</sub>) δ 163.2, 160.8, 144.1, 136.6, 130.3, 129.6, 129.1 (d, *J* = 8.4 Hz), 127.7, 127.0

(d, *J* = 2.9 Hz), 126.4, 125.8, 123.0, 118.2, 117.9, 117.5, 115.3 (d, *J* = 21.0 Hz), 26.4, 21.6, 15.1. <sup>19</sup>F NMR (376 MHz, CDCl<sub>3</sub>) δ -113.97. HRMS (GC/QTOF) *m/z*: [M]<sup>+</sup> calcd for C<sub>23</sub>H<sub>19</sub>BrFNO<sub>2</sub>S, 471.0304; found 471.0310.

### 1-Bromo-2-phenyl-3-(phenylsulfonyl)indolizine (4a)

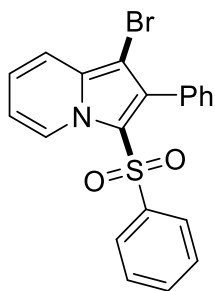

410.9929; found 410.9921.

Preparative TLC on silica gel (eluent: PE/EA = 8/1, v/v) to afford **4a**. Green solid (89.8 mg, 73%), mp 146.4-147.1 °C. <sup>1</sup>H NMR (400 MHz, CDCl<sub>3</sub>) δ 9.20 (d, *J* = 7.2 Hz, 1H), 7.55 (d, *J* = 8.1 Hz, 3H), 7.45 (d, *J* = 6.0 Hz, 4H), 7.33 (t, *J* = 7.3 Hz, 4H), 7.15 (t, 1H), 6.88 (t, *J* = 7.0 Hz, 1H). <sup>13</sup>C NMR (101 MHz, CDCl<sub>3</sub>) δ 142.4, 135.9, 134.3, 133.0, 131.8, 131.0, 130.6, 129.0, 128.5, 127.6, 126.3, 126.1, 123.6, 118.0, 114.1, 91.9. HRMS (GC/QTOF) *m/z*: [M]<sup>+</sup> calcd for C<sub>20</sub>H<sub>14</sub>BrNO<sub>2</sub>S,

### 1-Bromo-3-((4-fluorophenyl)sulfonyl)-2-phenylindolizine (4b)

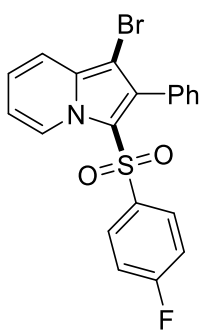

-104.50. HRMS (GC/QTOF) *m/z*: [M]<sup>+</sup> calcd for C<sub>20</sub>H<sub>13</sub>BrFNO<sub>2</sub>S, 428.9834; found 428.9832.

Preparative TLC on silica gel (eluent: PE/EA = 8/1, v/v) to afford **4b**. Green solid (89.9 mg, 70%), mp 150.1-150.7 °C. <sup>1</sup>H NMR (400 MHz, CDCl<sub>3</sub>) δ 9.21 (d, *J* = 7.2 Hz, 1H), 7.58 – 7.49 (m, 3H), 7.47 – 7.42 (m, 3H), 7.32 – 7.28 (m, 2H), 7.19 – 7.14 (m, 1H), 7.00 – 6.95 (m, 2H), 6.92 – 6.87 (m, 1H). <sup>13</sup>C NMR (101 MHz, CDCl<sub>3</sub>) δ 166.5, 164.0, 138.5 (d, *J* = 3.1 Hz), 135.8, 134.3, 131.7, 131.0, 129.1 (d, *J* = 9.5 Hz), 128.6, 127.7, 126.0, 123.7, 118.0, 116.1 (d, *J* = 22.6 Hz), 114.2, 91.9. <sup>19</sup>F NMR (376 MHz, CDCl<sub>3</sub>) δ

### 1-Bromo-3-((4-chlorophenyl)sulfonyl)-2-phenylindolizine (4c)

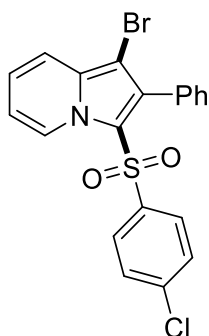

Preparative TLC on silica gel (eluent: PE/EA = 8/1, v/v) to afford **4c**. Green solid (78.6 mg, 59%), mp 186.6-187.2 °C. <sup>1</sup>H NMR (400 MHz, CDCl<sub>3</sub>) δ 9.20 (d, *J* = 7.2 Hz, 1H), 7.66 (d, *J* = 7.4 Hz, 1H), 7.56 (d, *J* = 8.9 Hz, 1H), 7.48 – 7.43 (m, 5H), 7.32 – 7.27 (m, 3H), 7.17 (t, 1H), 6.90 (t, *J* = 6.9 Hz, 1H). <sup>13</sup>C NMR (101 MHz, CDCl<sub>3</sub>) δ 140.9, 139.6, 136.0, 134.5, 131.6, 131.1, 129.2, 128.9, 128.6, 127.8, 127.7, 126.1, 123.8, 118.1, 114.3, 92.1. HRMS (GC/QTOF) *m/z*: [M]<sup>+</sup> calcd for C<sub>20</sub>H<sub>13</sub>BrClNO<sub>2</sub>S, 444.9539; found 444.9533.

### 1-Bromo-3-((3-chloro-4-fluorophenyl)sulfonyl)-2-phenylindolizine (4d)

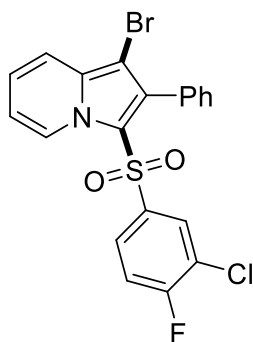

Preparative TLC on silica gel (eluent: PE/EA = 8/1, v/v) to afford **4d**. Green solid (105.3 mg, 76%), mp 122.3-122.9 °C. <sup>1</sup>H NMR (400 MHz, CDCl<sub>3</sub>) δ 9.24 (d, *J* = 7.2 Hz, 1H), 7.57 (d, *J* = 9.0 Hz, 1H), 7.49 – 7.45 (m, 3H), 7.42 (s, 1H), 7.40 – 7.35 (m, 1H), 7.30 – 7.27 (m, 2H), 7.21 – 7.16 (m, 1H), 7.04 (t, *J* = 8.5 Hz, 1H), 6.95 – 6.90 (m, 1H). <sup>13</sup>C NMR (101 MHz, CDCl<sub>3</sub>) δ 162.0, 159.4, 139.5 (d, *J* = 3.8 Hz), 136.1, 134.6, 131.4, 131.0, 129.5, 128.8, 127.8, 126.8 (d, *J* = 8.6 Hz), 126.1, 124.0, 122.1 (d, *J* = 18.8 Hz), 118.1, 117.1 (d, *J* = 22.4 Hz), 114.5, 92.1.

<sup>19</sup>F NMR (376 MHz, CDCl<sub>3</sub>) δ -106.80. HRMS (GC/QTOF) *m/z*: [M]<sup>+</sup> calcd for C<sub>20</sub>H<sub>12</sub>BrClFNO<sub>2</sub>S, 462.9445; found 462.9439.

#### 1-Bromo-3-(methylsulfonyl)-2-phenylindolizine (4e)

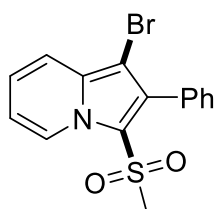

Preparative TLC on silica gel (eluent: PE/EA = 8/1, v/v) to afford **4e**.

Green solid (71.0 mg, 68%), mp 121.6-122.2 °C. <sup>1</sup>H NMR (400 MHz, CDCl<sub>3</sub>) δ 9.12 (d, *J* = 7.2 Hz, 1H), 7.61 (d, *J* = 9.0 Hz, 1H), 7.46 (d, *J* = 5.3 Hz, 5H), 7.19 (t, *J* = 7.8 Hz, 1H), 6.89 (t, *J* = 6.9 Hz, 1H), 2.92 (s,

3H). <sup>13</sup>C NMR (101 MHz, CDCl<sub>3</sub>) δ 135.3, 134.0, 131.7, 130.8, 128.7, 128.0, 126.2, 123.5, 118.0, 116.0, 114.1, 91.4, 45.3. HRMS (GC/QTOF) *m/z*: [M]<sup>+</sup> calcd for C<sub>15</sub>H<sub>12</sub>BrNO<sub>2</sub>S, 348.9772; found 348.9781.

#### 1-Bromo-3-(ethylsulfonyl)-2-phenylindolizine (4f)

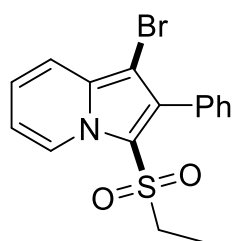

Preparative TLC on silica gel (eluent: PE/EA = 8/1, v/v) to afford **4f**. Green solid

(68.4 mg, 63%), mp 106.8-107.3 °C. <sup>1</sup>H NMR (400 MHz, CDCl<sub>3</sub>) δ 9.14 (d, *J* = 7.2 Hz, 1H), 7.58 (t, 2H), 7.45 (d, *J* = 2.9 Hz, 4H), 7.18 (t, 1H), 6.87 (t, *J* = 7.0 Hz, 1H), 2.94 (q, *J* = 7.4 Hz, 2H), 1.11 (t, *J* = 7.4 Hz, 3H). <sup>13</sup>C NMR (101 MHz, CDCl<sub>3</sub>) δ 136.0, 133.5, 131.7, 130.9, 128.7, 128.7, 128.2, 127.8, 126.3, 123.5, 118.0, 114.0,

51.4, 7.3. HRMS (GC/QTOF) *m/z*: [M]<sup>+</sup> calcd for C<sub>16</sub>H<sub>14</sub>BrNO<sub>2</sub>S, 362.9929; found 362.9932.

#### 2-Phenyl-1-thiocyanato-3-tosylindolizine (6a)

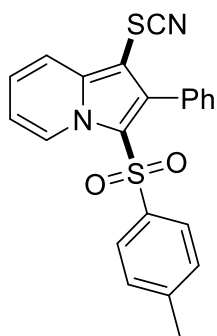

Preparative TLC on silica gel (eluent: PE/EA = 4/1, v/v) to afford **6a**. Yellow solid (67.0 mg, 83%), mp 223.9-224.6 °C. <sup>1</sup>H NMR (400 MHz, CDCl<sub>3</sub>) δ 9.29 (d, *J* = 7.2 Hz, 1H), 7.83 (d, *J* = 8.9 Hz, 1H), 7.51 – 7.45 (m, 5H), 7.40 – 7.37 (m, 1H), 7.36 – 7.32 (m, 2H), 7.16 (d, *J* = 8.2 Hz, 2H), 7.07 – 7.03 (m, 1H), 2.35 (s, 3H). <sup>13</sup>C NMR (101 MHz, CDCl<sub>3</sub>) δ 144.6, 140.7, 138.8, 138.5, 130.9, 130.8, 129.8, 128.9, 127.8, 126.9, 126.6, 126.0, 119.4, 117.4, 115.1, 111.2, 91.1, 21.6. HRMS (GC/QTOF) *m/z*: [M]<sup>+</sup> calcd for C<sub>22</sub>H<sub>16</sub>N<sub>2</sub>O<sub>2</sub>S<sub>2</sub>, 404.0653; found 404.0655.

### 7-Methyl-2-phenyl-1-thiocyanato-3-tosylindolizine (6b)

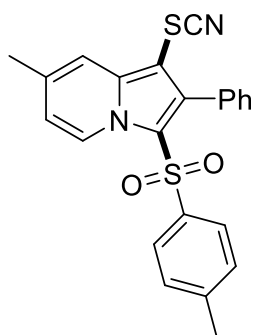

Preparative TLC on silica gel (eluent: PE/EA = 4/1, v/v) to afford **6b**. Black solid (68.5 mg, 82%), mp 226.3-226.8 °C. <sup>1</sup>H NMR (400 MHz, CDCl<sub>3</sub>) δ 9.16 (d, *J* = 7.3 Hz, 1H), 7.58 (s, 1H), 7.51 – 7.43 (m, 5H), 7.37 – 7.32 (m, 2H), 7.15 (d, *J* = 8.2 Hz, 2H), 6.88 (dd, *J* = 7.3, 1.8 Hz, 1H), 2.48 (s, 3H), 2.34 (s, 3H). <sup>13</sup>C NMR (101 MHz, CDCl<sub>3</sub>) δ 144.4, 140.9, 139.1, 139.0, 137.5, 130.9, 130.9, 129.7, 128.8, 127.8, 126.5, 126.3, 118.5, 117.7, 115.8, 111.5, 89.4, 21.6, 21.4. HRMS (GC/QTOF) *m/z*: [M]<sup>+</sup>

calcd for C<sub>23</sub>H<sub>18</sub>N<sub>2</sub>O<sub>2</sub>S<sub>2</sub>, 418.0810; found 418.0813.

### 2-(3-Fluorophenyl)-1-thiocyanato-3-tosylindolizine (6c)

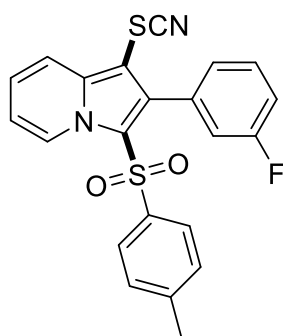

Preparative TLC on silica gel (eluent: PE/EA = 4/1, v/v) to afford **6c**. Green liquid (67.5 mg, 80%). <sup>1</sup>H NMR (400 MHz, CDCl<sub>3</sub>) δ 9.26 (d, *J* = 7.2 Hz, 1H), 7.52 (d, *J* = 8.4 Hz, 1H), 7.48 – 7.43 (m, 3H), 7.41 – 7.36 (m, 1H), 7.24 – 7.17 (m, 3H), 7.16 – 7.13 (m, 1H), 7.09 – 7.02 (m, 2H), 2.36 (s, 3H). <sup>13</sup>C NMR (101 MHz, CDCl<sub>3</sub>) δ 163.2, 160.8, 144.8, 139.0 (d, *J* = 2.2 Hz), 138.5 (d, *J* = 9.9 Hz), 132.8

(d, *J* = 8.5 Hz), 129.8, 129.4 (d, *J* = 8.4 Hz), 126.7, 126.7 (d, *J* = 3.1 Hz), 126.6, 126.1, 119.4, 117.9 (d, *J* = 22.6 Hz), 117.3, 115.9 (d, *J* = 20.9 Hz), 115.3, 110.9, 90.9, 21.6. <sup>19</sup>F NMR (376 MHz, CDCl<sub>3</sub>) δ -113.10 (td, *J* = 9.0, 5.9 Hz). HRMS (GC/QTOF) *m/z*: [M]<sup>+</sup> calcd for C<sub>22</sub>H<sub>15</sub>FN<sub>2</sub>O<sub>2</sub>S<sub>2</sub>, 422.0559; found 422.0562.

### 2-Phenyl-1-(phenylselanyl)-3-tosylindolizine (7a)

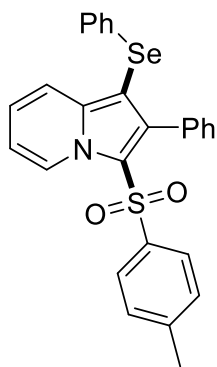

Preparative TLC on silica gel (eluent: PE/EA = 5/1, v/v) to afford **7a**. Green solid (90.5 mg, 90%), mp 177.8-178.3 °C. <sup>1</sup>H NMR (400 MHz, CDCl<sub>3</sub>) δ 9.23 (d, *J* = 7.2 Hz, 1H), 7.73 (d, *J* = 8.9 Hz, 1H), 7.51 (d, *J* = 8.3 Hz, 2H), 7.41 – 7.33 (m, 3H), 7.24 – 7.21 (m, 2H), 7.15 (d, *J* = 8.0 Hz, 3H), 7.10 – 7.07 (m, 2H), 7.02 – 6.98 (m, 2H), 6.94 – 6.89 (m, 1H), 2.35 (s, 3H). <sup>13</sup>C NMR (101 MHz, CDCl<sub>3</sub>) δ 143.9, 141.8, 139.5, 139.4, 133.3, 133.1, 131.0, 129.6, 129.0, 129.0, 128.1, 127.2, 126.5, 126.4, 126.0, 124.3, 119.2, 117.7, 114.2, 99.5, 21.6. HRMS (GC/QTOF) *m/z*: [M]<sup>+</sup> calcd for C<sub>27</sub>H<sub>21</sub>NO<sub>2</sub>SSe, 503.0458;

found 503.0452.

### 2-(3-Bromophenyl)-1-(phenylselanyl)-3-tosylindolizine (7b)

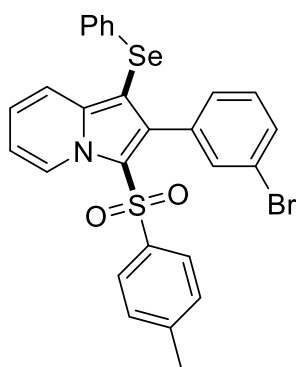

Preparative TLC on silica gel (eluent: PE/EA = 5/1, v/v) to afford **7b**. Yellow oil (102.0 mg, 88%). <sup>1</sup>H NMR (400 MHz, CDCl<sub>3</sub>) δ 9.24 (d, *J* = 7.2 Hz, 1H), 7.76 (d, *J* = 8.9 Hz, 1H), 7.50 (d, *J* = 8.5 Hz, 3H), 7.24 – 7.16 (m, 5H), 7.15 (d, *J* = 1.5 Hz, 1H), 7.12 – 7.08 (m, 3H), 7.02 – 6.98 (m, 2H), 6.94 (td, *J* = 7.0, 1.4 Hz, 1H), 2.37 (s, 3H). <sup>13</sup>C NMR (101 MHz, CDCl<sub>3</sub>) δ 144.2, 139.7, 139.4, 135.2, 133.6, 132.9, 131.0, 129.8, 129.7, 129.4, 129.1, 128.8, 126.5, 126.4, 126.3, 124.4, 121.2, 119.3, 118.0, 114.4, 99.6, 21.7. HRMS (GC/QTOF) *m/z*: [M]<sup>+</sup>

calcd for C<sub>27</sub>H<sub>20</sub>BrNO<sub>2</sub>SSe, 580.9563; found 580.9559.

### 1-(Methylselanyl)-2-phenyl-3-tosylindolizine (7c)

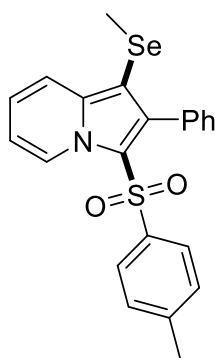

Preparative TLC on silica gel (eluent: PE/EA = 5/1, v/v) to afford **7c**. Yellow oil (74.9 mg, 85%). <sup>1</sup>H NMR (400 MHz, CDCl<sub>3</sub>) δ 9.18 (d, *J* = 7.2 Hz, 1H), 7.80 (d, *J* = 8.9 Hz, 1H), 7.49 (d, *J* = 8.2 Hz, 2H), 7.44 (d, *J* = 5.4 Hz, 3H), 7.34 – 7.29 (m, 2H), 7.13 (d, *J* = 7.7 Hz, 3H), 6.87 (t, *J* = 6.9 Hz, 1H), 2.33 (s, 3H), 1.85 (s, 3H). <sup>13</sup>C NMR (101 MHz, CDCl<sub>3</sub>) δ 143.8, 141.0, 139.7, 138.7, 133.6, 131.0, 129.5, 128.0, 127.3, 126.5, 126.2, 123.5, 119.3, 113.8, 104.4, 101.1, 21.6, 9.6. HRMS (GC/QTOF) *m/z*: [M]<sup>+</sup> calcd for C<sub>22</sub>H<sub>19</sub>NO<sub>2</sub>SSe, 441.0302; found 441.0311.

### 2-Phenyl-1-(p-tolylthio)-3-tosylindolizine (7d)

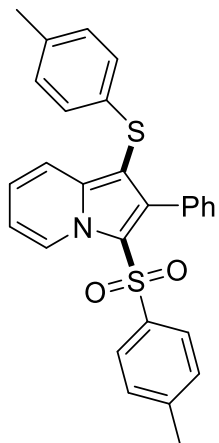

Preparative TLC on silica gel (eluent: PE/EA = 6.5/1, v/v) to afford **7d**. Green solid (75.9 mg, 81%), mp 190.6-191.5 °C. <sup>1</sup>H NMR (400 MHz, CDCl<sub>3</sub>) δ 9.24 (d, *J* = 7.2 Hz, 1H), 7.69 (d, *J* = 8.9 Hz, 1H), 7.51 (d, *J* = 8.3 Hz, 2H), 7.41 – 7.31 (m, 3H), 7.30 – 7.21 (m, 2H), 7.18 – 7.11 (m, 3H), 6.97 – 6.87 (m, 3H), 6.78 (d, *J* = 8.2 Hz, 2H), 2.35 (s, 3H), 2.23 (s, 3H). <sup>13</sup>C NMR (101 MHz, CDCl<sub>3</sub>) δ 143.9, 141.5, 139.5, 139.1, 135.0, 134.8, 132.1, 131.0, 129.6, 129.5, 128.1, 127.2, 126.5, 126.4, 126.4, 124.3, 118.2, 117.4, 114.3, 102.9, 21.6, 20.9. HRMS (GC/QTOF) *m/z*: [M]<sup>+</sup> calcd for C<sub>28</sub>H<sub>23</sub>NO<sub>2</sub>S<sub>2</sub>, 469.1170; found 469.1180.

### 3. NMR spectra for new compounds

$^1\text{H}$  NMR (400 MHz,  $\text{CDCl}_3$ ),  $^{13}\text{C}$  NMR (100 MHz,  $\text{CDCl}_3$ ) spectrum of compound **3a**

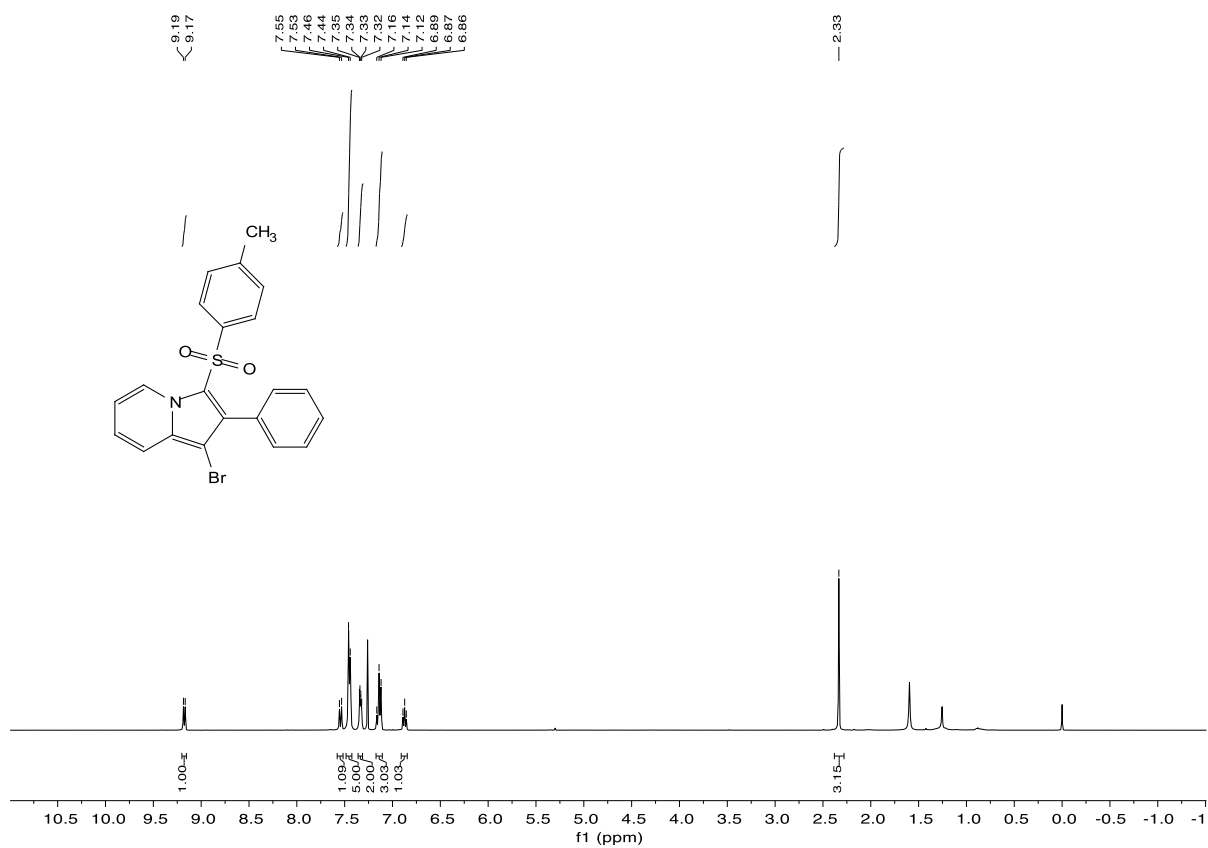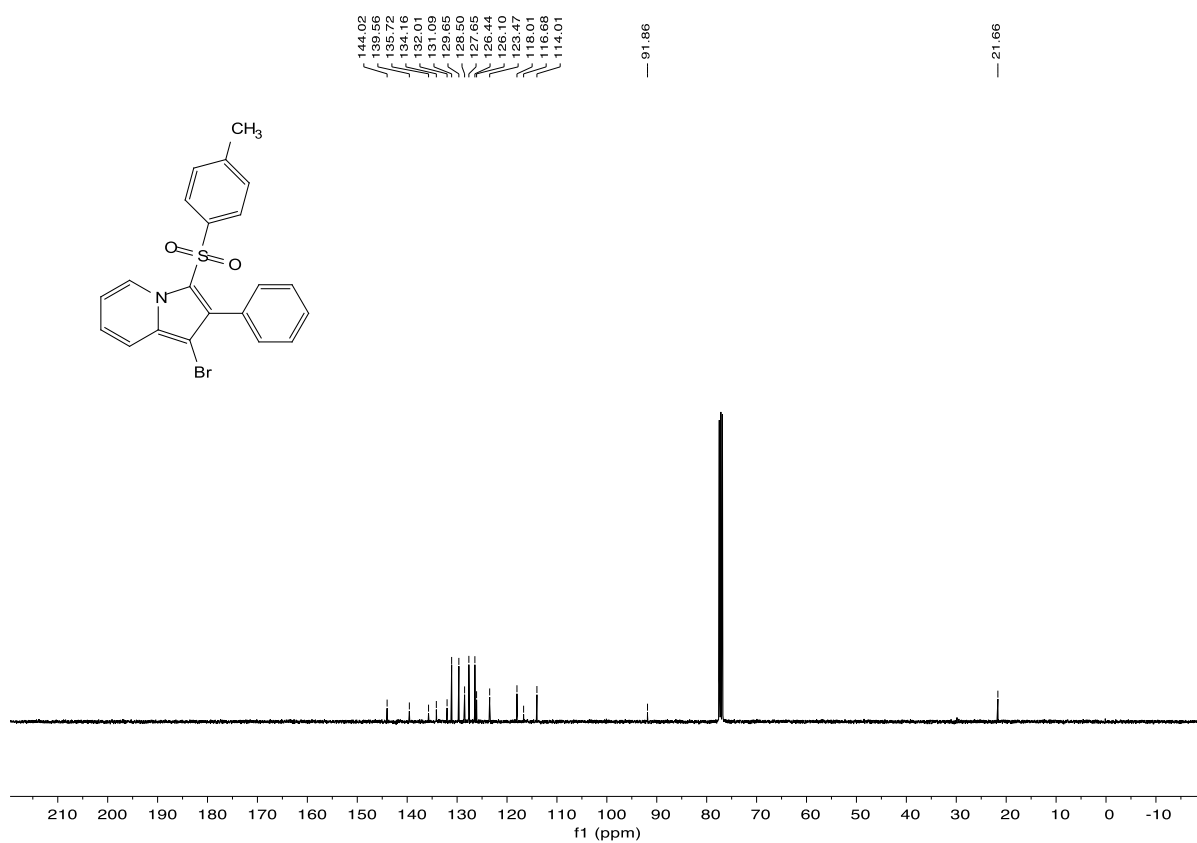



$^1\text{H}$  NMR (400 MHz,  $\text{CDCl}_3$ ),  $^{13}\text{C}$  NMR (100 MHz,  $\text{CDCl}_3$ ) spectrum of compound **3b**

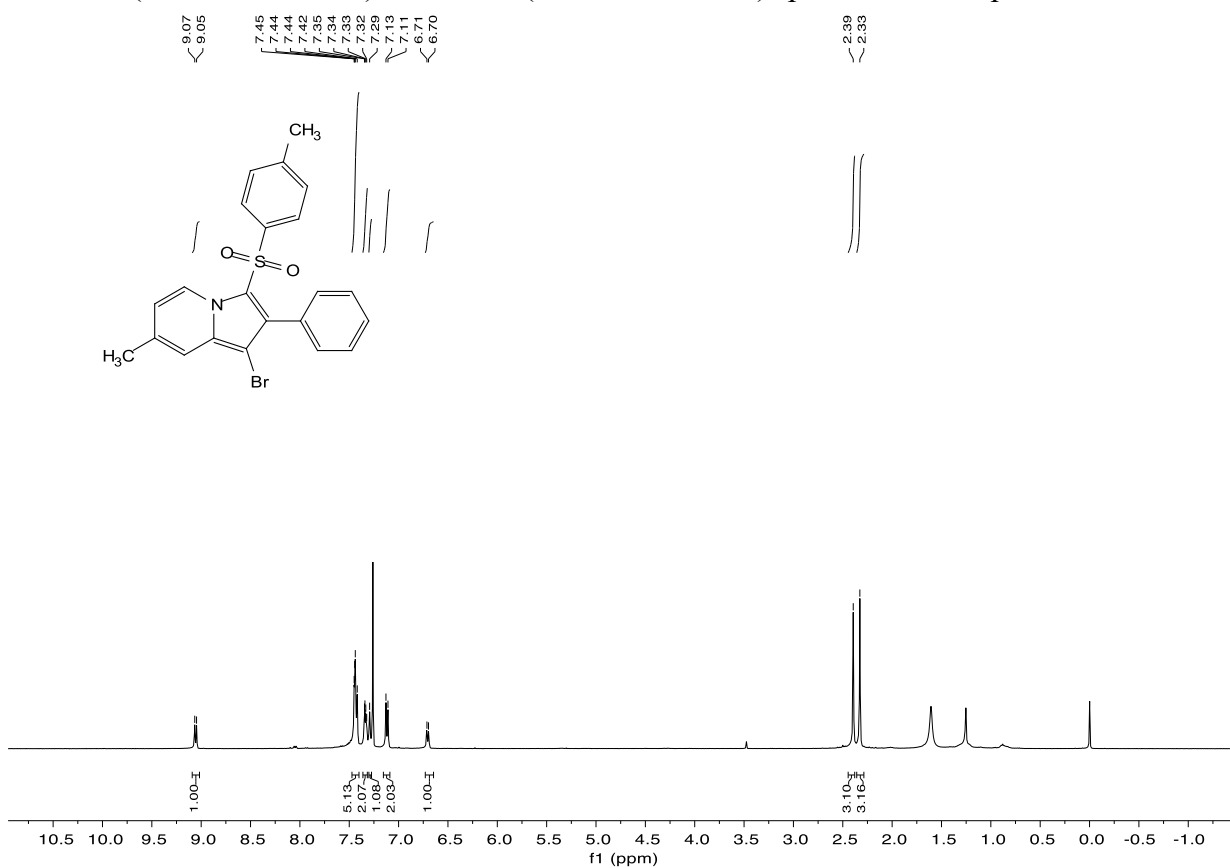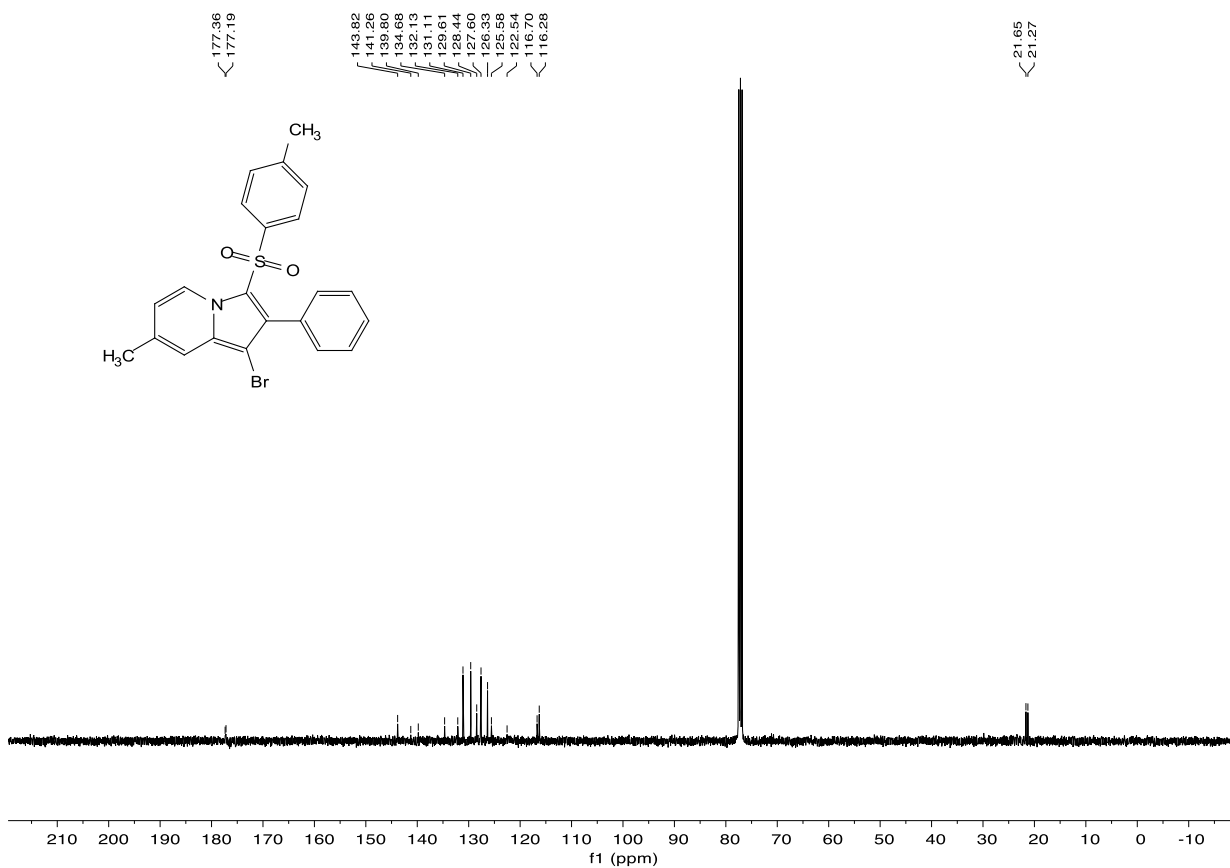

$^1\text{H}$  NMR (400 MHz,  $\text{CDCl}_3$ ),  $^{13}\text{C}$  NMR (100 MHz,  $\text{CDCl}_3$ ) spectrum of compound **3c**

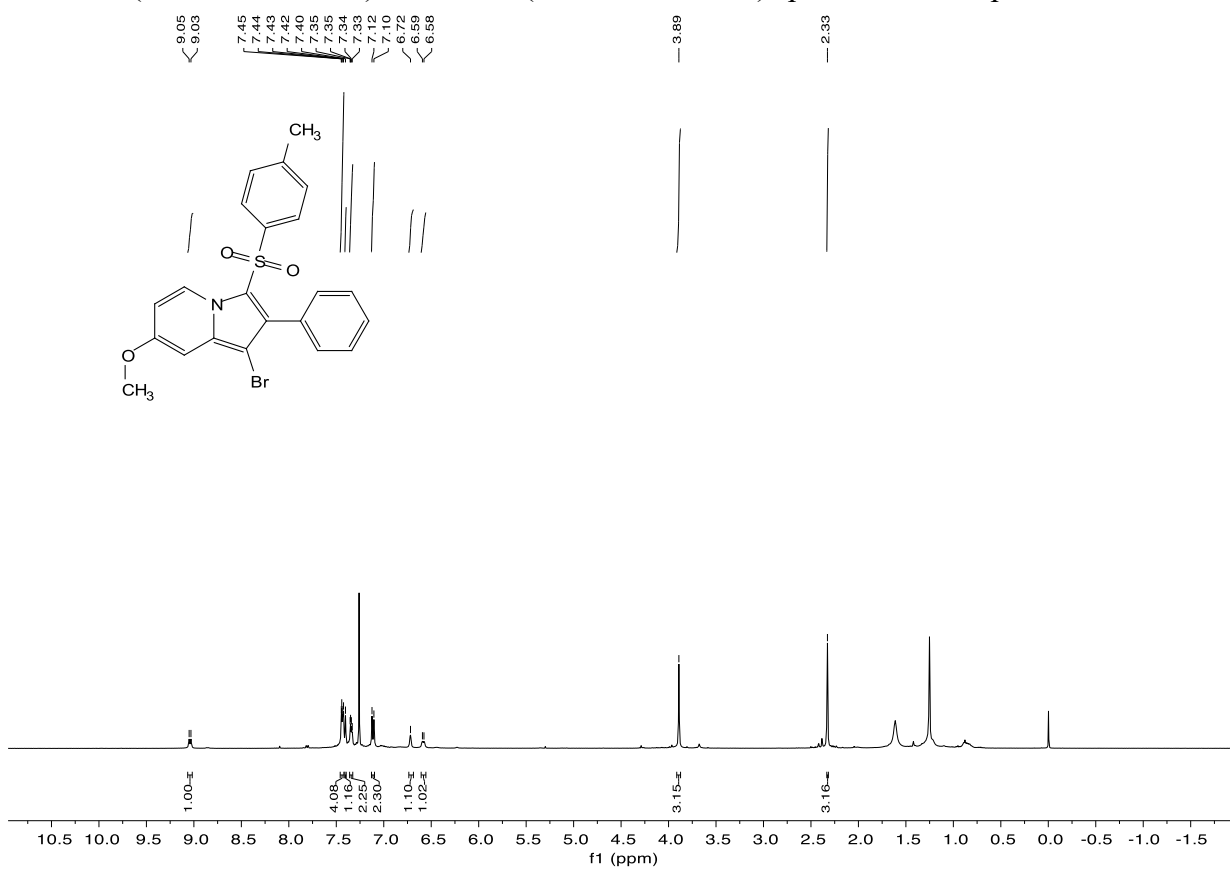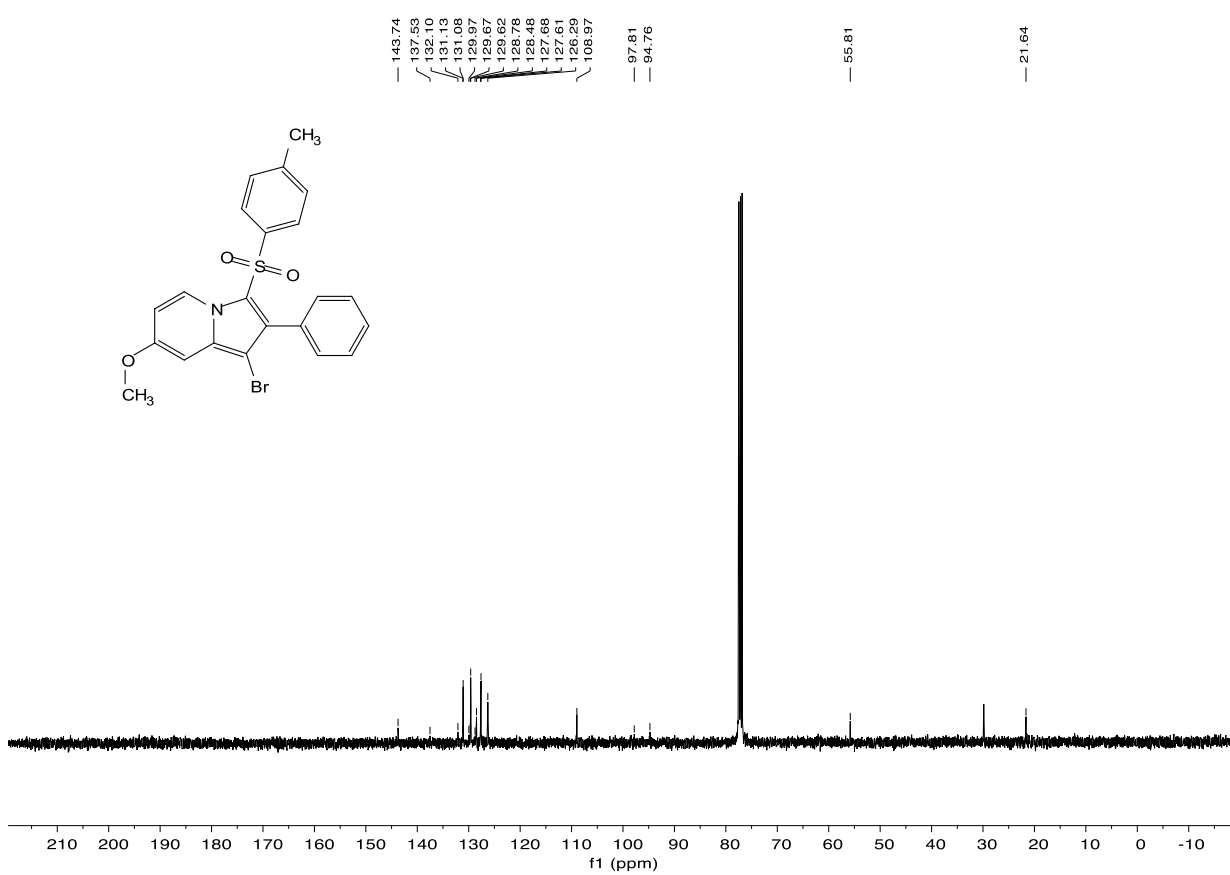

$^1\text{H}$  NMR (400 MHz,  $\text{CDCl}_3$ ),  $^{13}\text{C}$  NMR (100 MHz,  $\text{CDCl}_3$ ) spectrum of compound **3d**

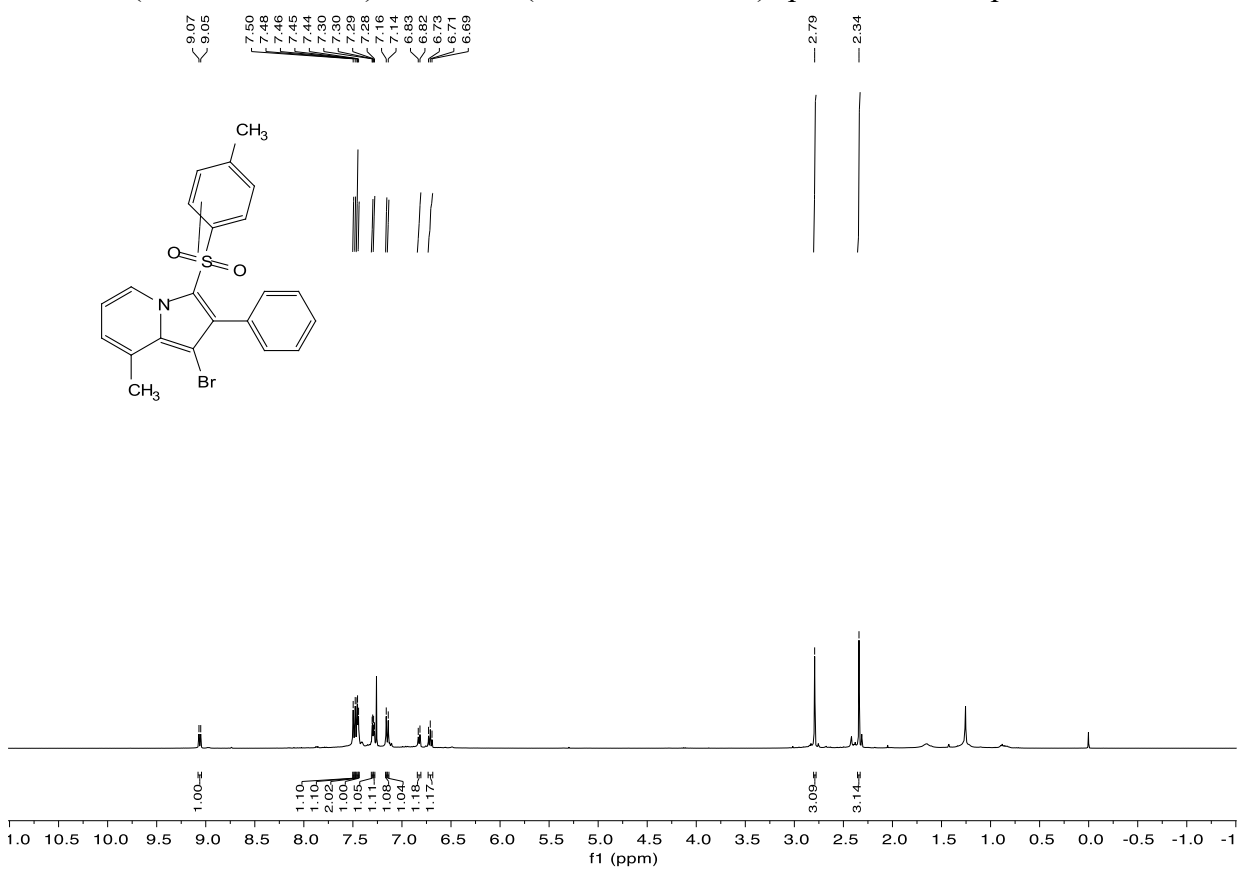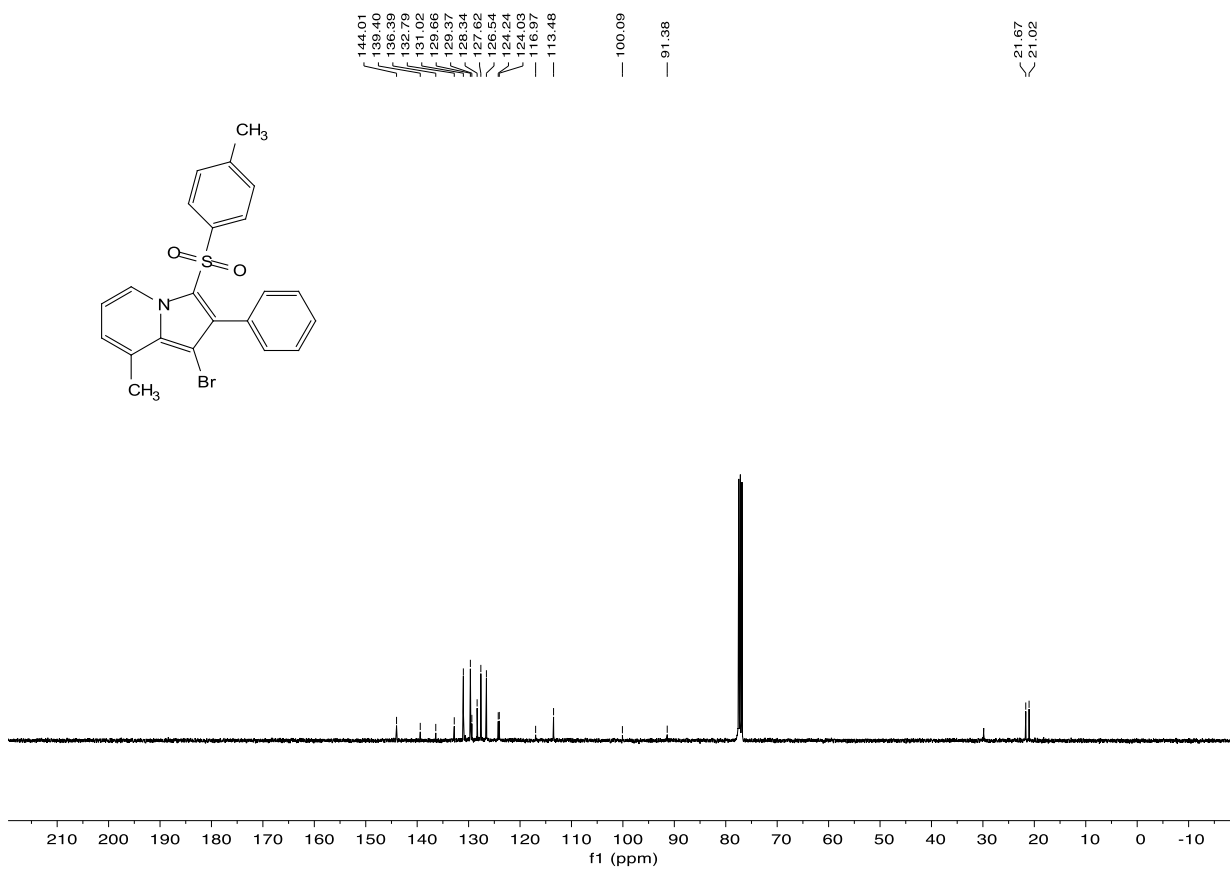

$^1\text{H}$  NMR (400 MHz,  $\text{CDCl}_3$ ),  $^{13}\text{C}$  NMR (100 MHz,  $\text{CDCl}_3$ ) spectrum of compound **3e**

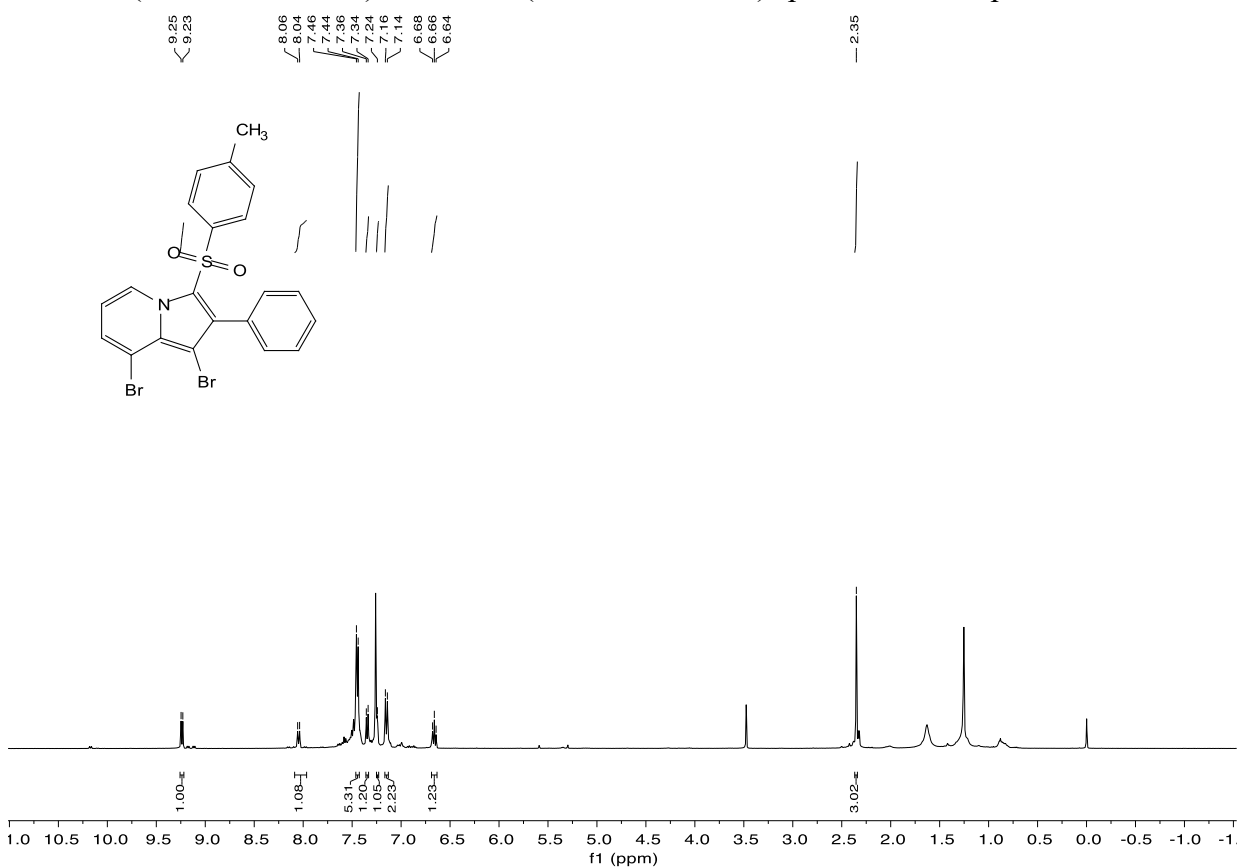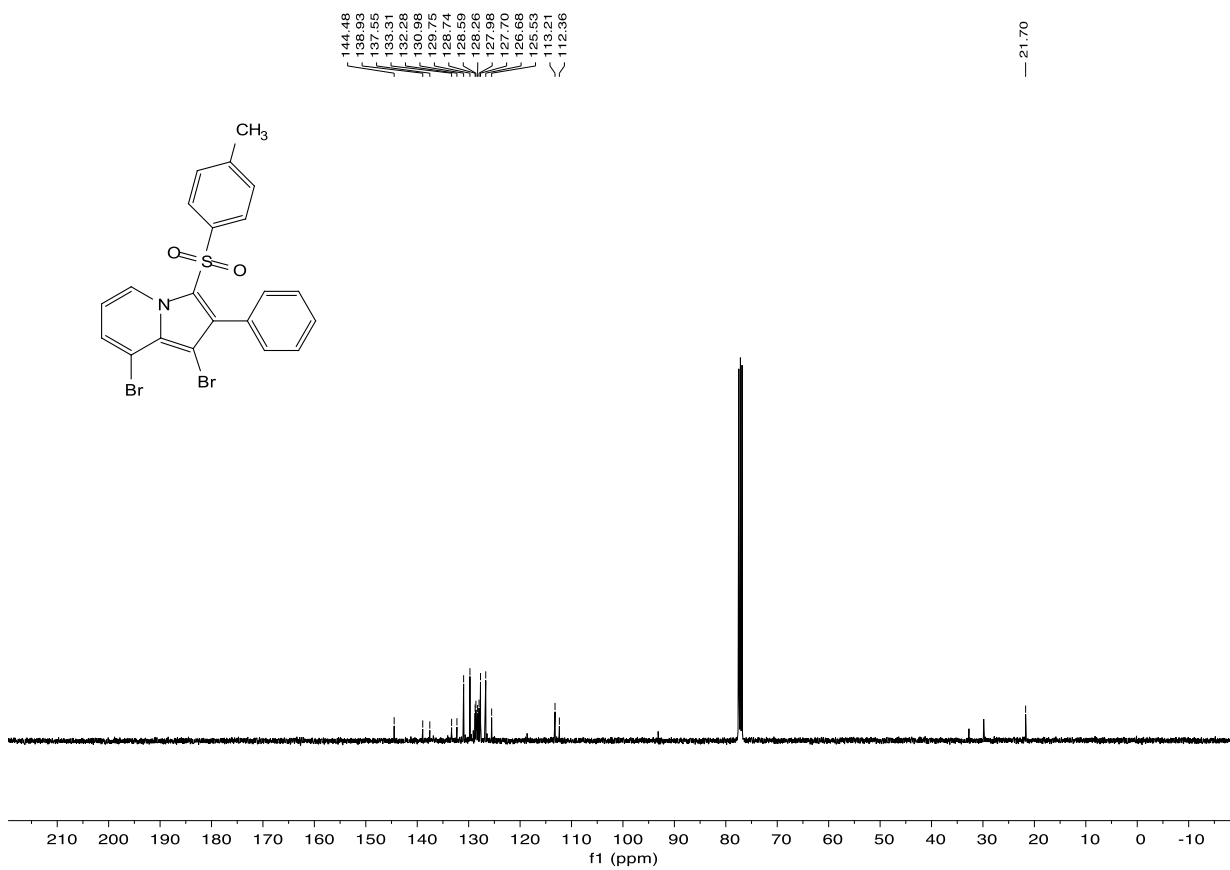

$^1\text{H}$  NMR (400 MHz,  $\text{CDCl}_3$ ),  $^{13}\text{C}$  NMR (100 MHz,  $\text{CDCl}_3$ ) spectrum of compound **3f**

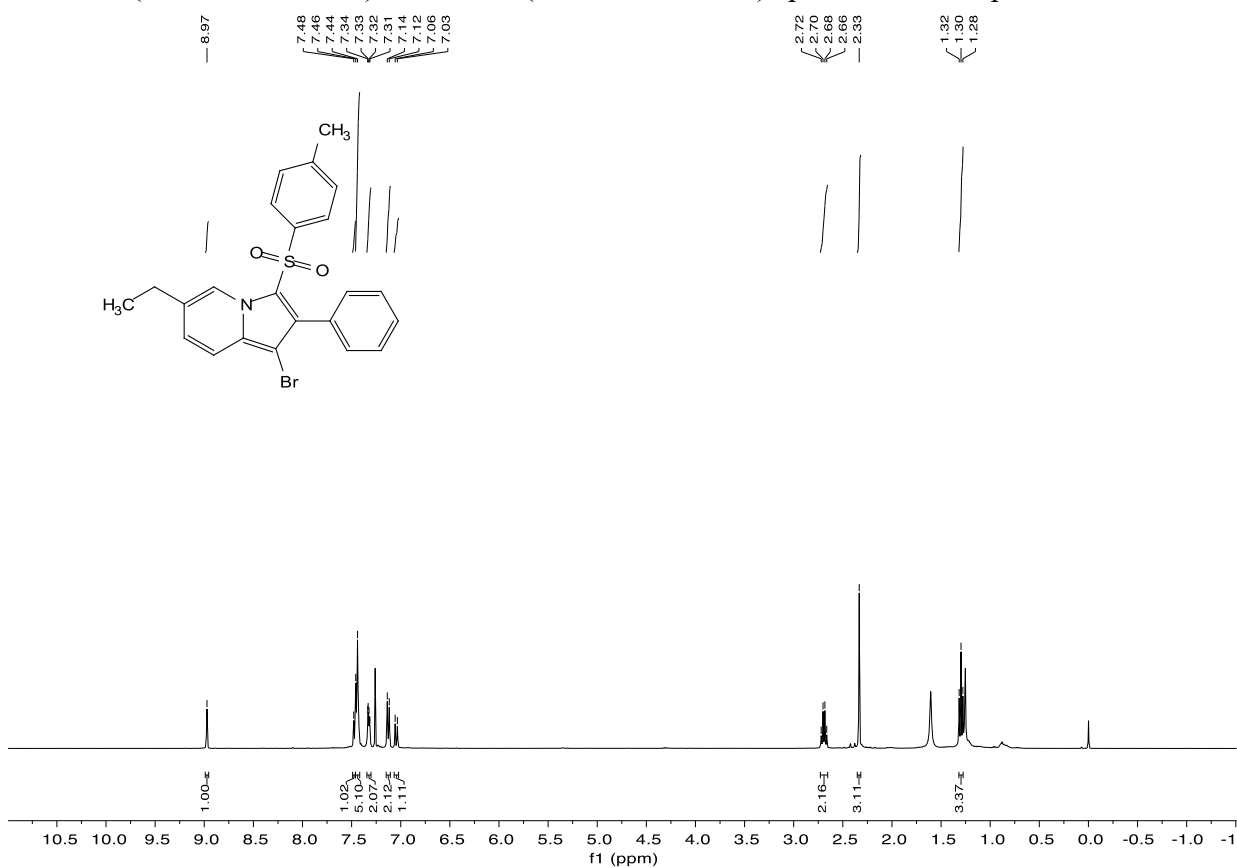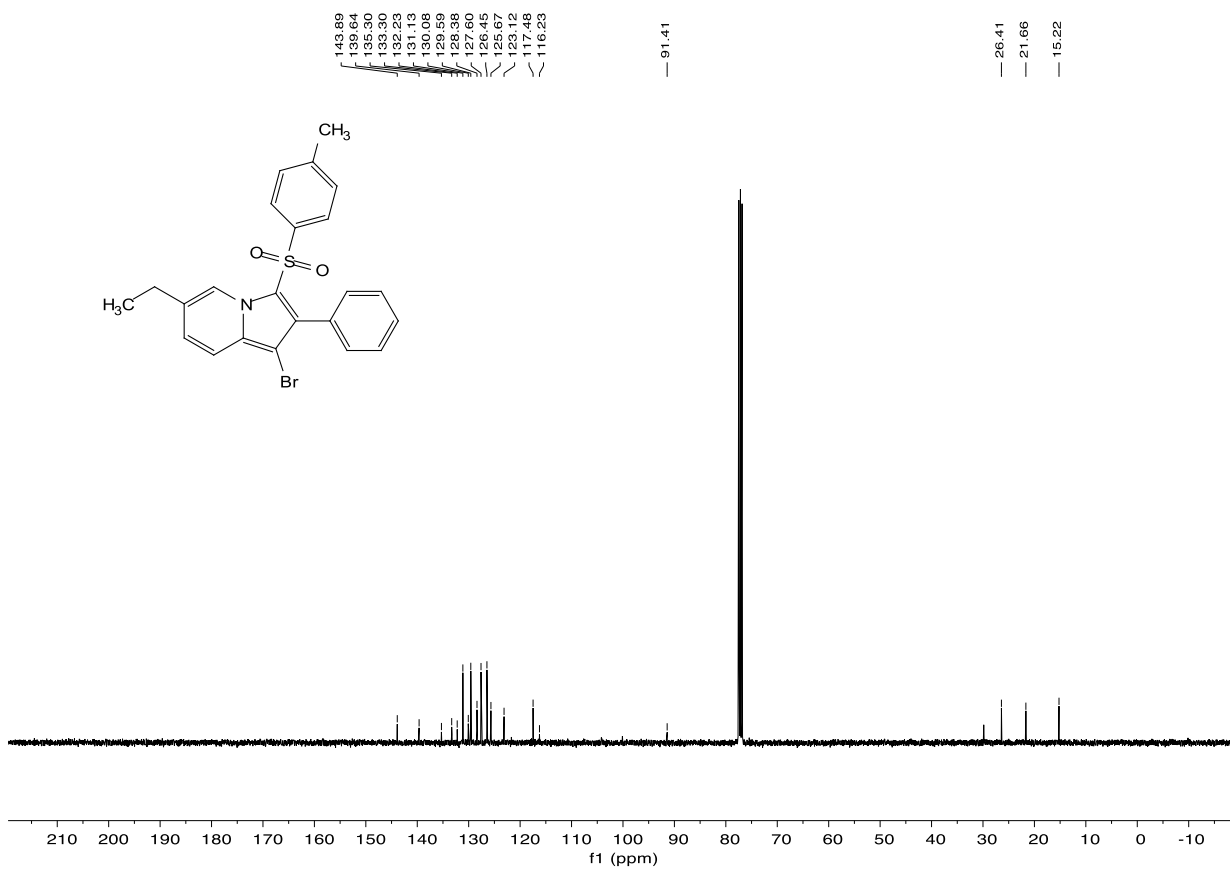

$^1\text{H}$  NMR (400 MHz,  $\text{CDCl}_3$ ), and  $^{13}\text{C}$  NMR (100 MHz,  $\text{CDCl}_3$ ) spectrum of compound **3g**

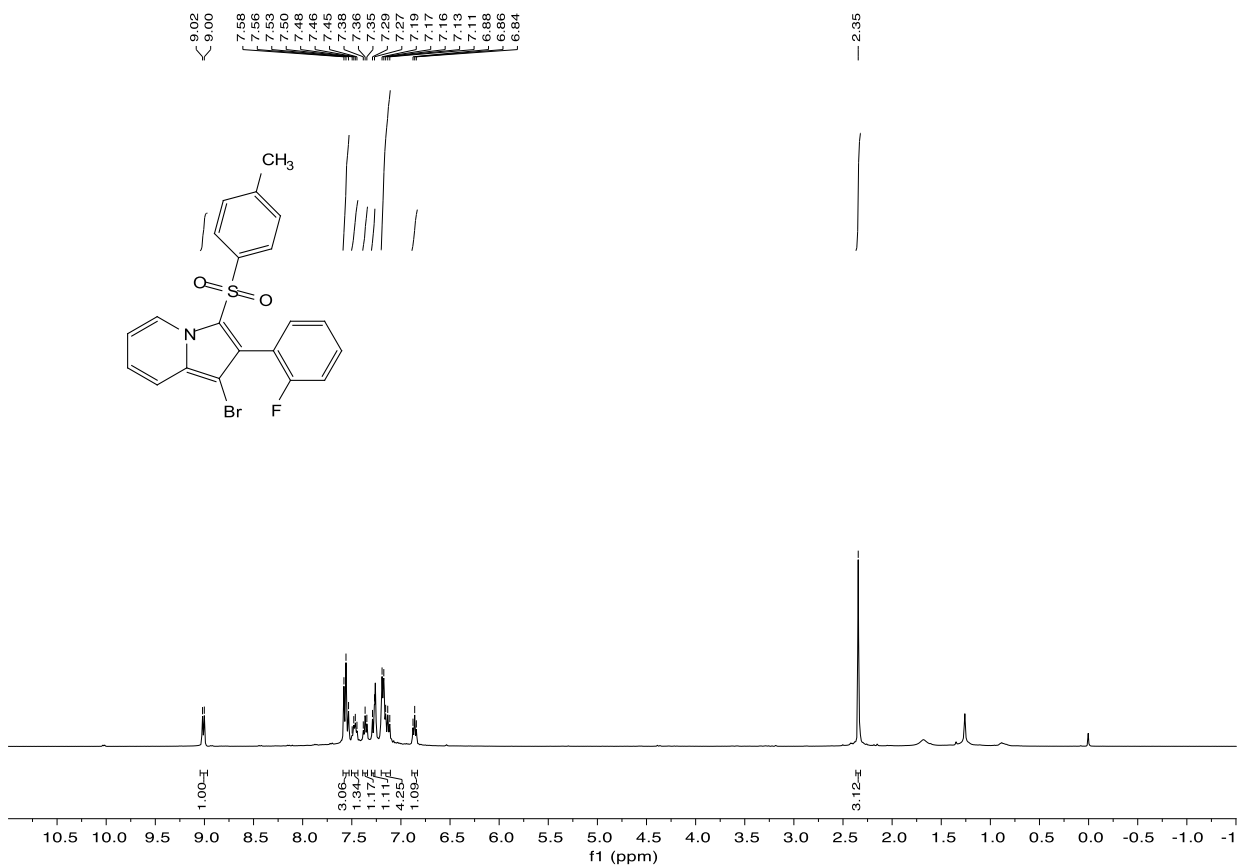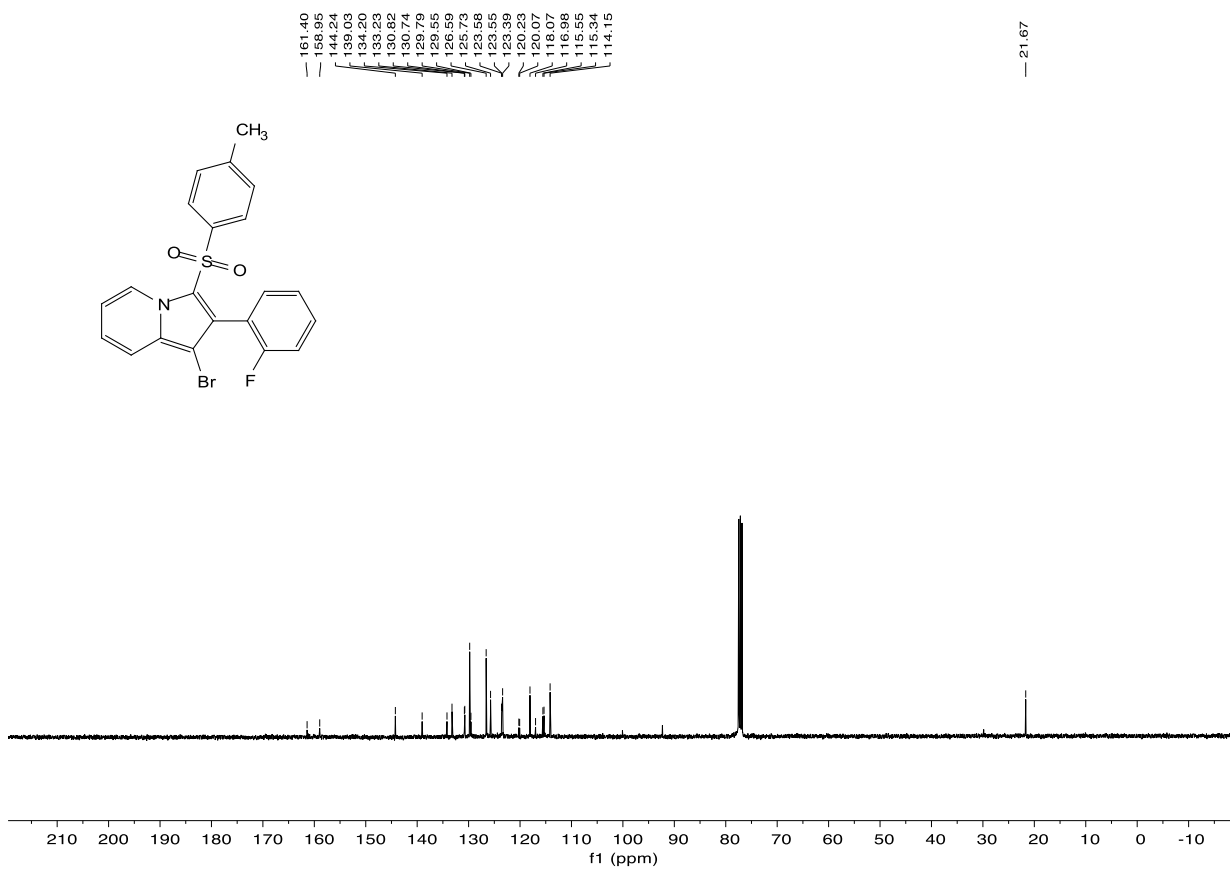

$^1\text{H}$  NMR (400 MHz,  $\text{CDCl}_3$ ),  $^{13}\text{C}$  NMR (100 MHz,  $\text{CDCl}_3$ ) spectrum of compound **3h**

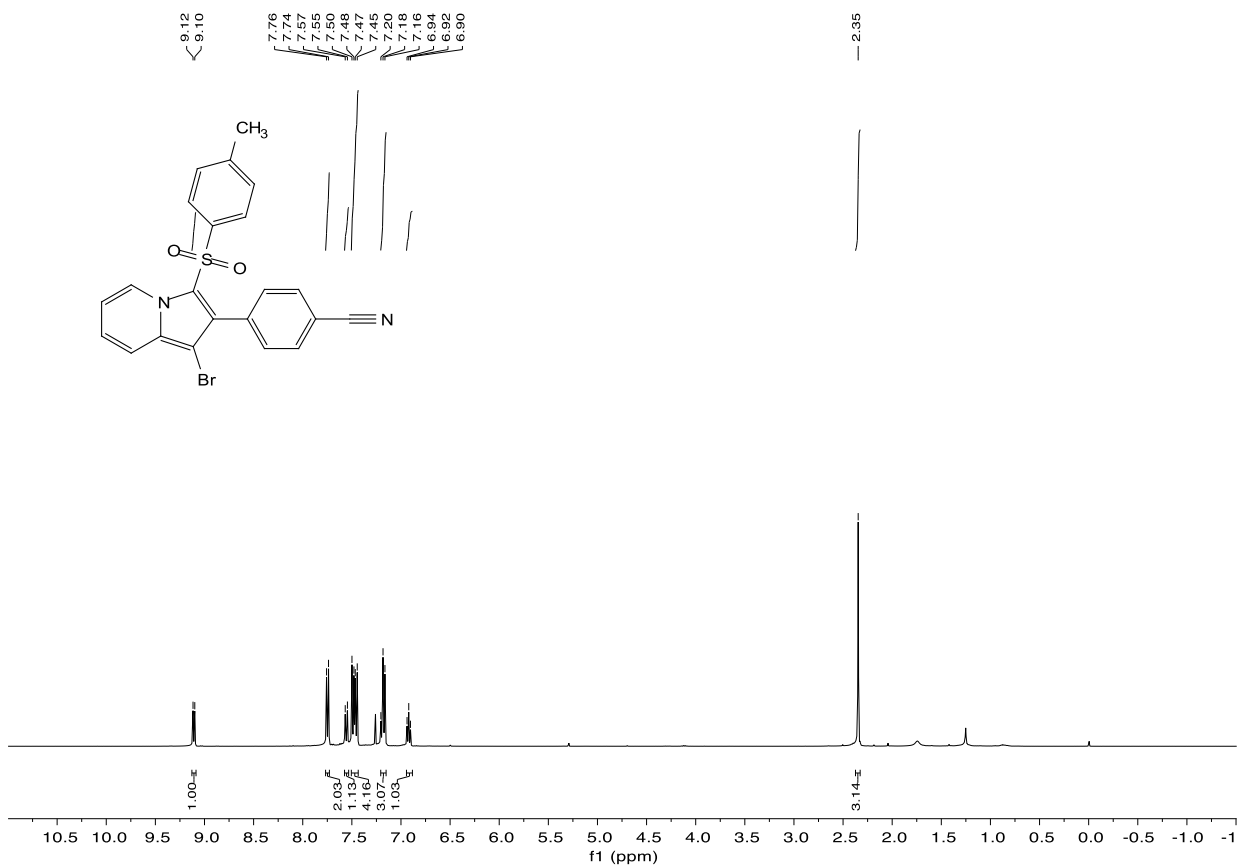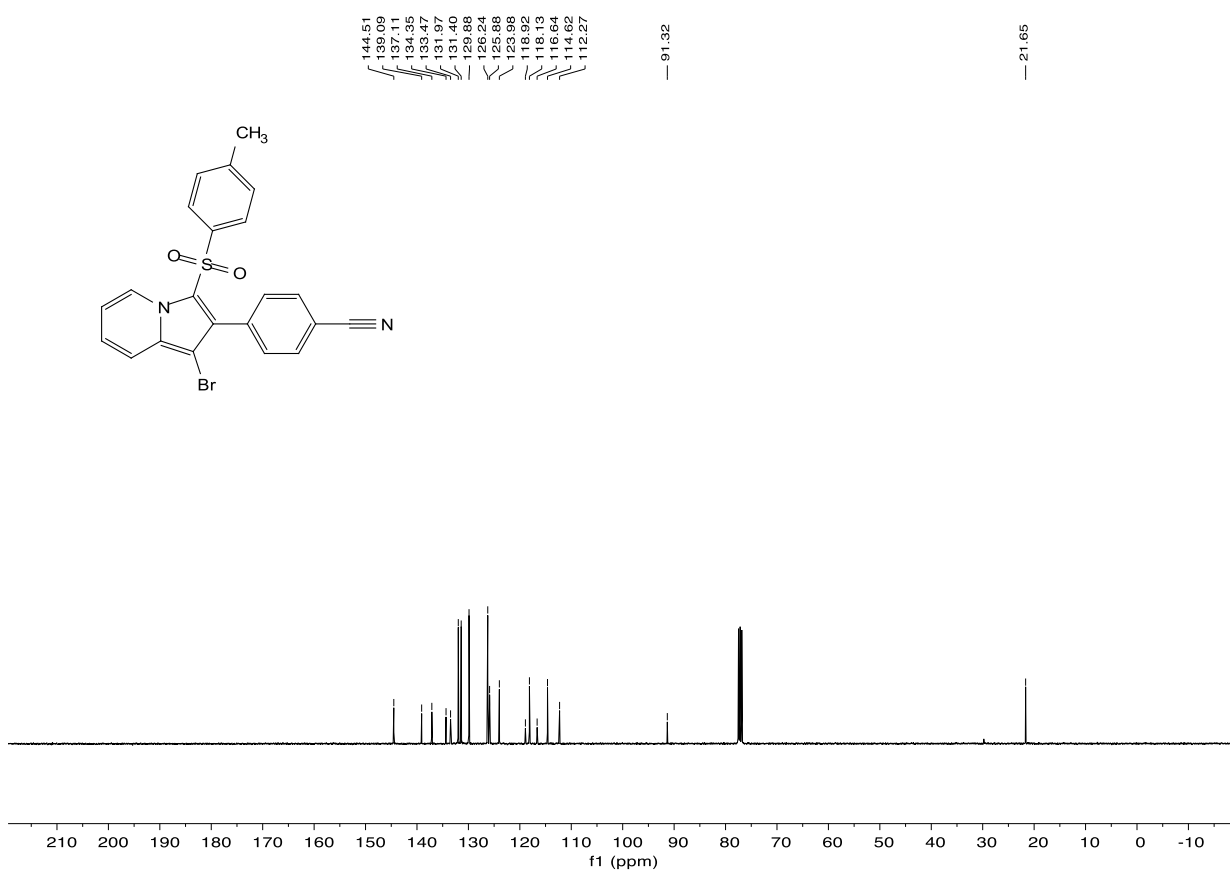

$^1\text{H}$  NMR (400 MHz,  $\text{CDCl}_3$ ),  $^{13}\text{C}$  NMR (100 MHz,  $\text{CDCl}_3$ ) spectrum of compound **3i**

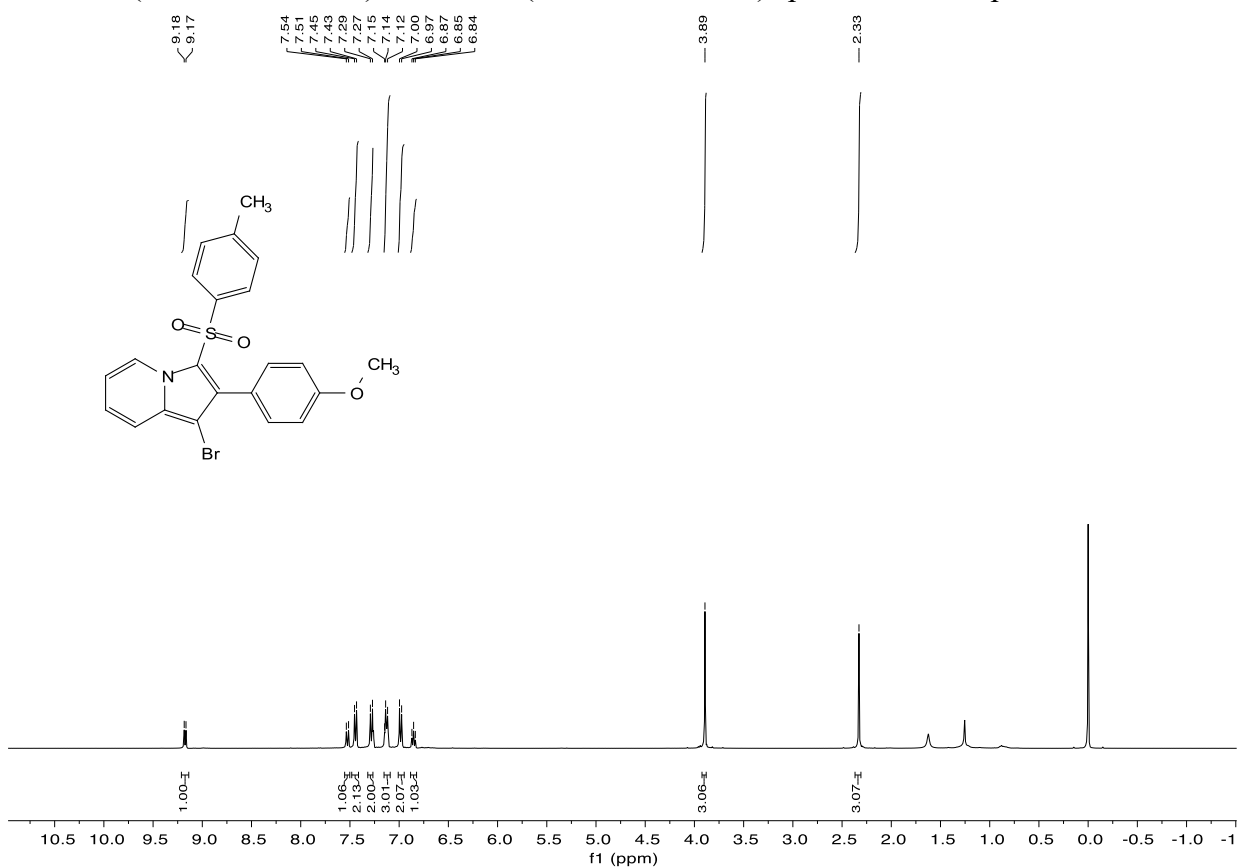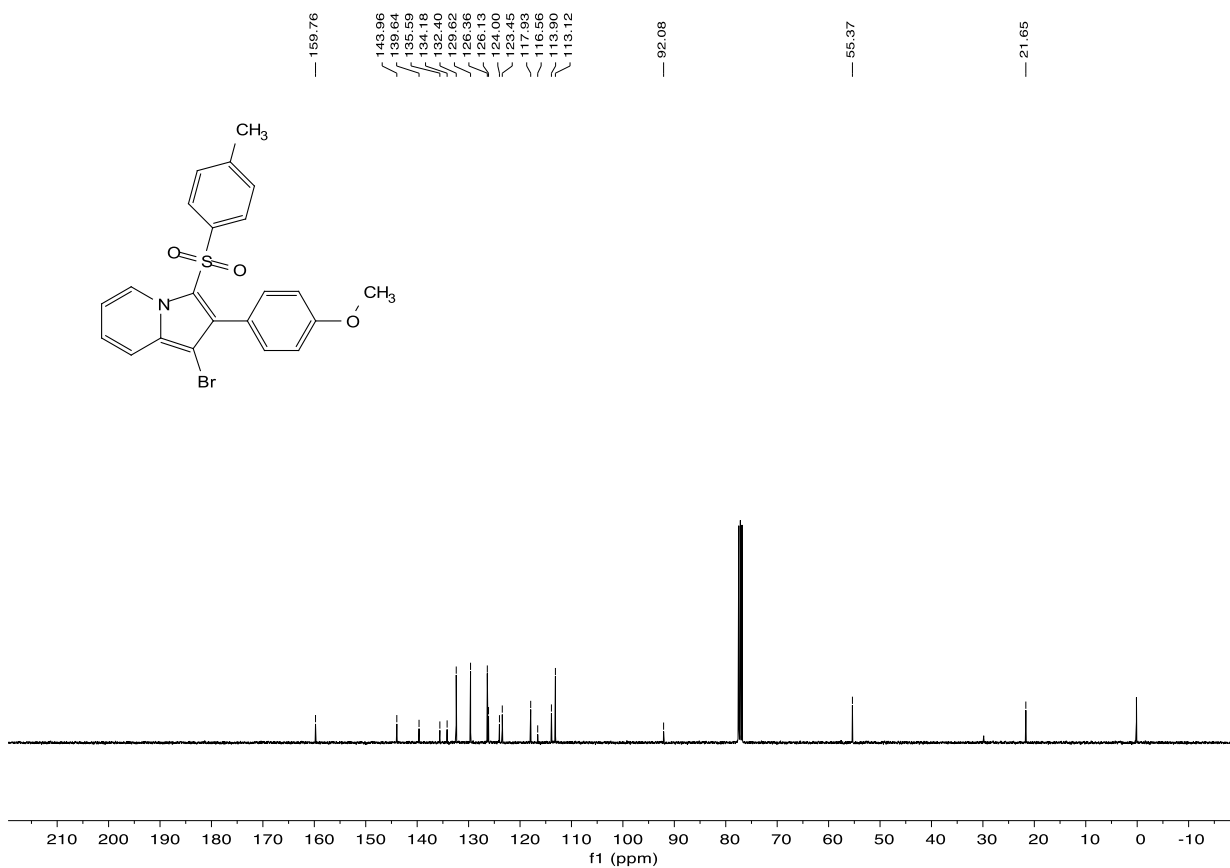



$^1\text{H}$  NMR (400 MHz,  $\text{CDCl}_3$ ) and  $^{13}\text{C}$  NMR (100 MHz,  $\text{CDCl}_3$ ) spectrum of compound **3j**

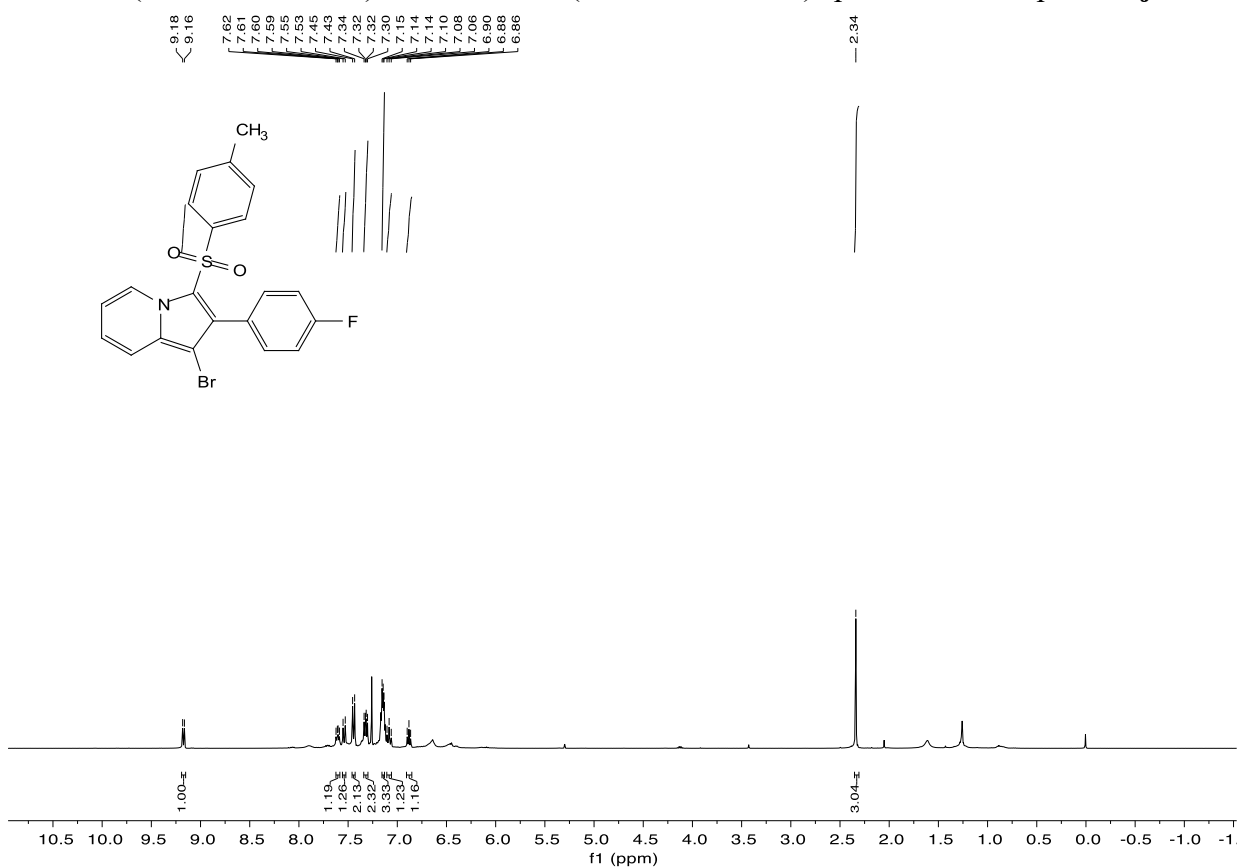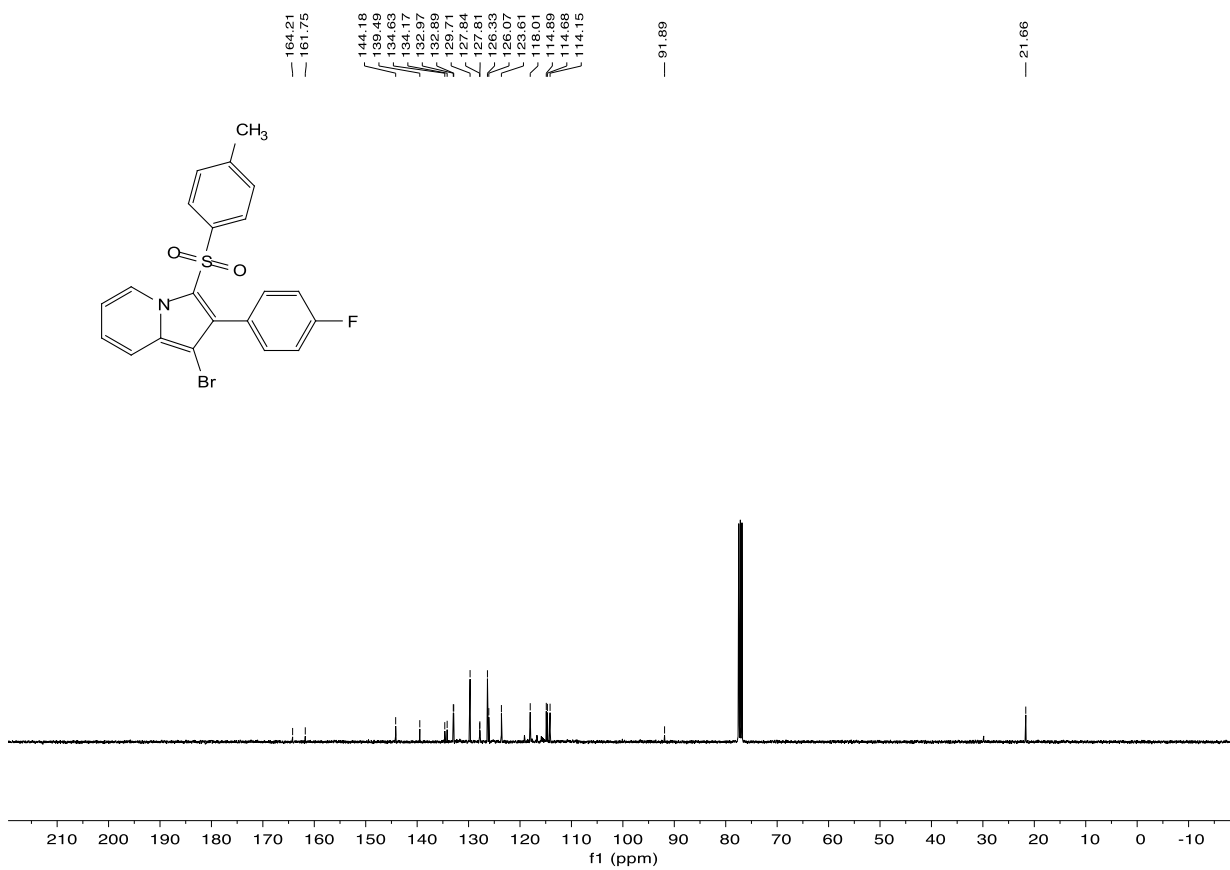

$^1\text{H}$  NMR (400 MHz,  $\text{CDCl}_3$ ),  $^{13}\text{C}$  NMR (100 MHz,  $\text{CDCl}_3$ ) spectrum of compound **3k**

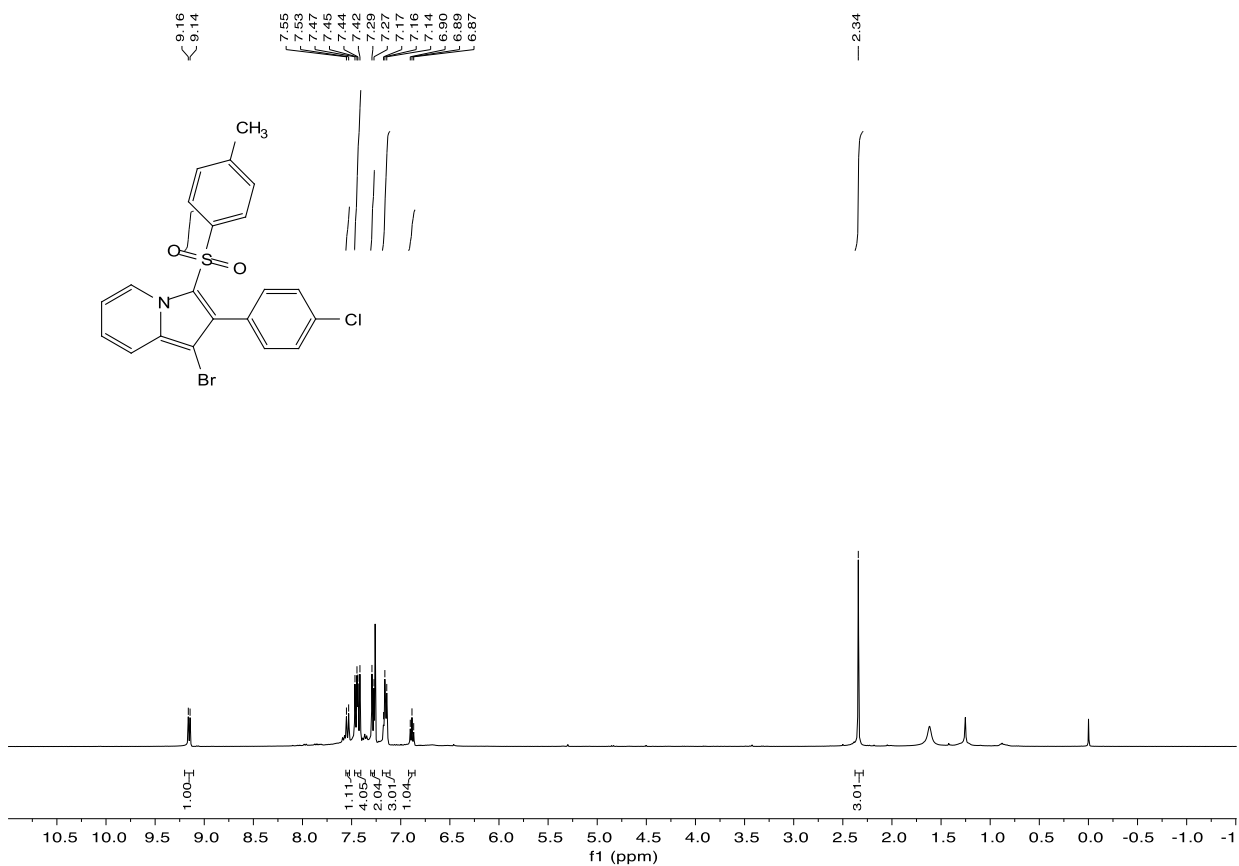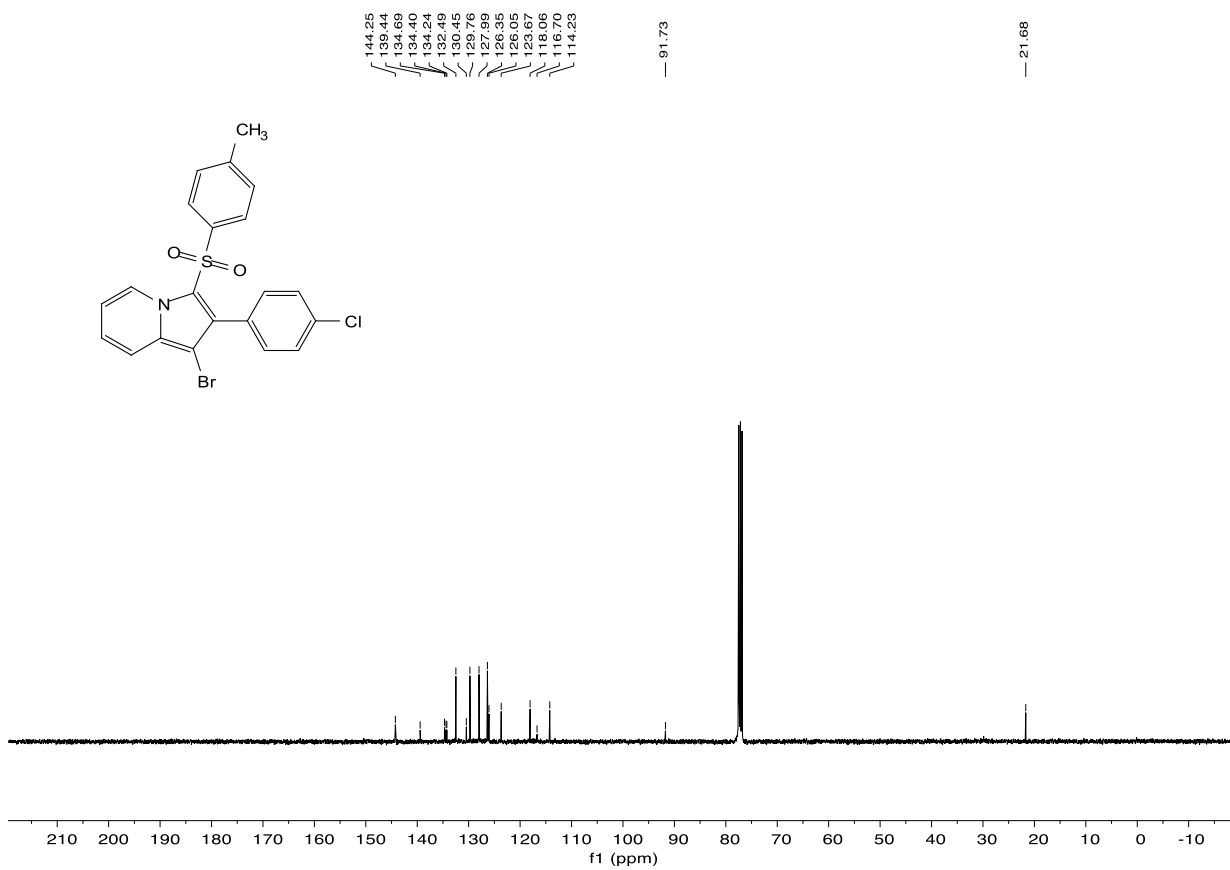

$^1\text{H}$  NMR (400 MHz,  $\text{CDCl}_3$ ),  $^{13}\text{C}$  NMR (100 MHz,  $\text{CDCl}_3$ ) spectrum of compound **31**

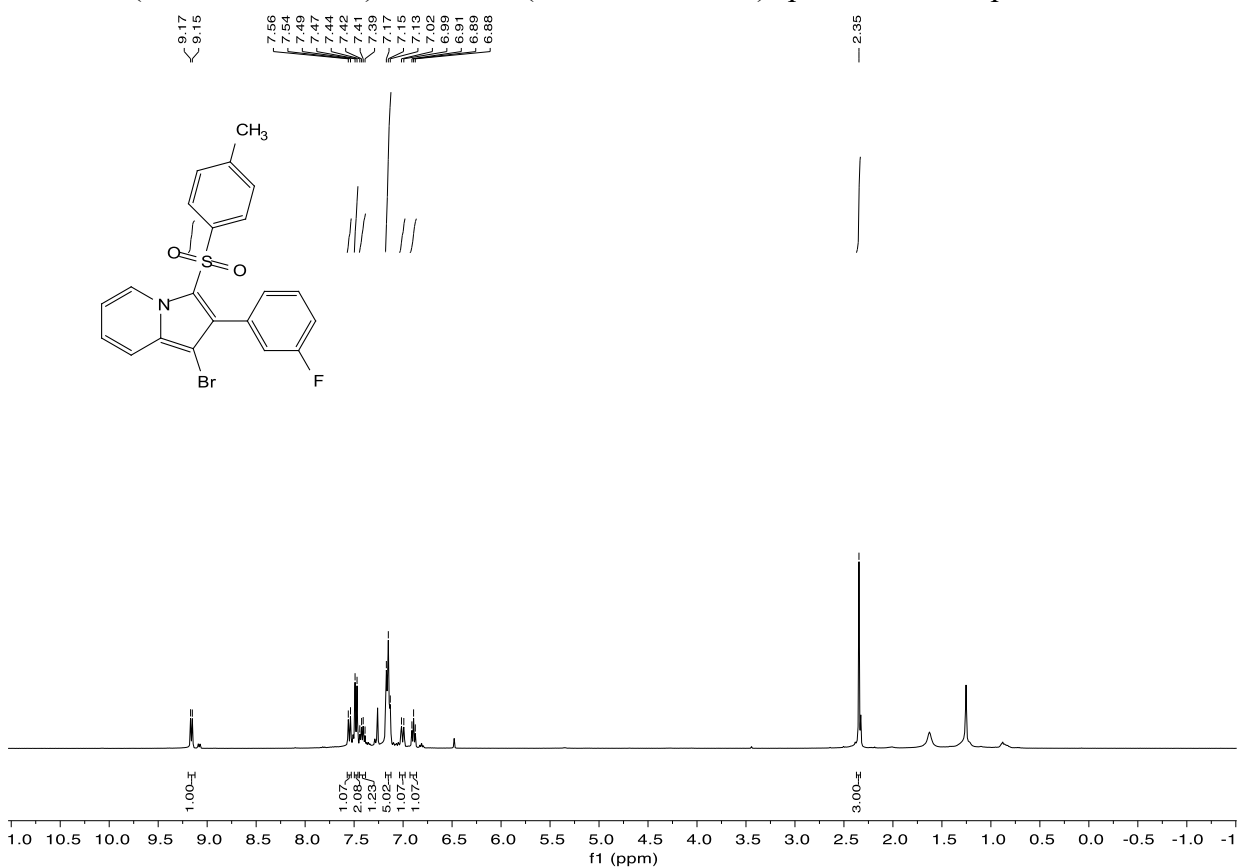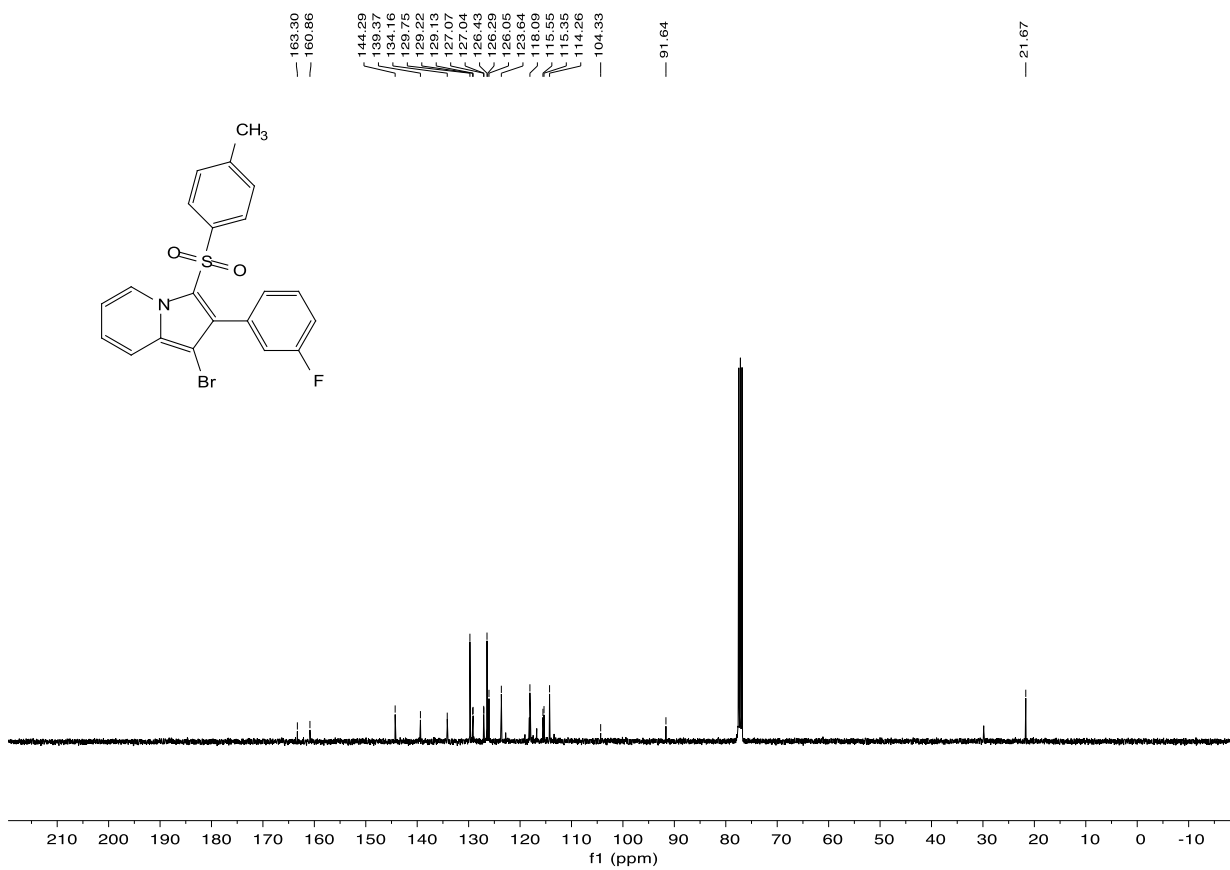

$^1\text{H}$  NMR (400 MHz,  $\text{CDCl}_3$ ),  $^{13}\text{C}$  NMR (100 MHz,  $\text{CDCl}_3$ ) spectrum of compound **3m**

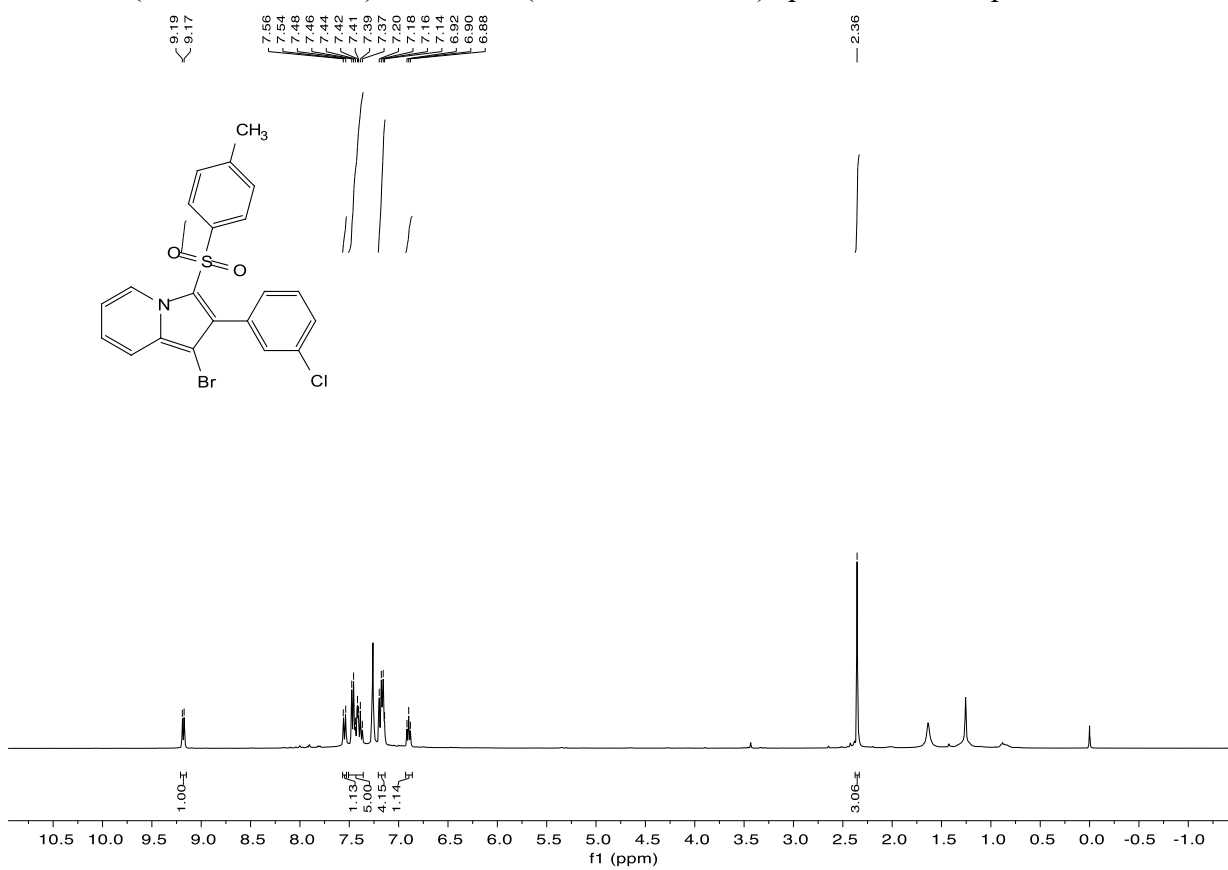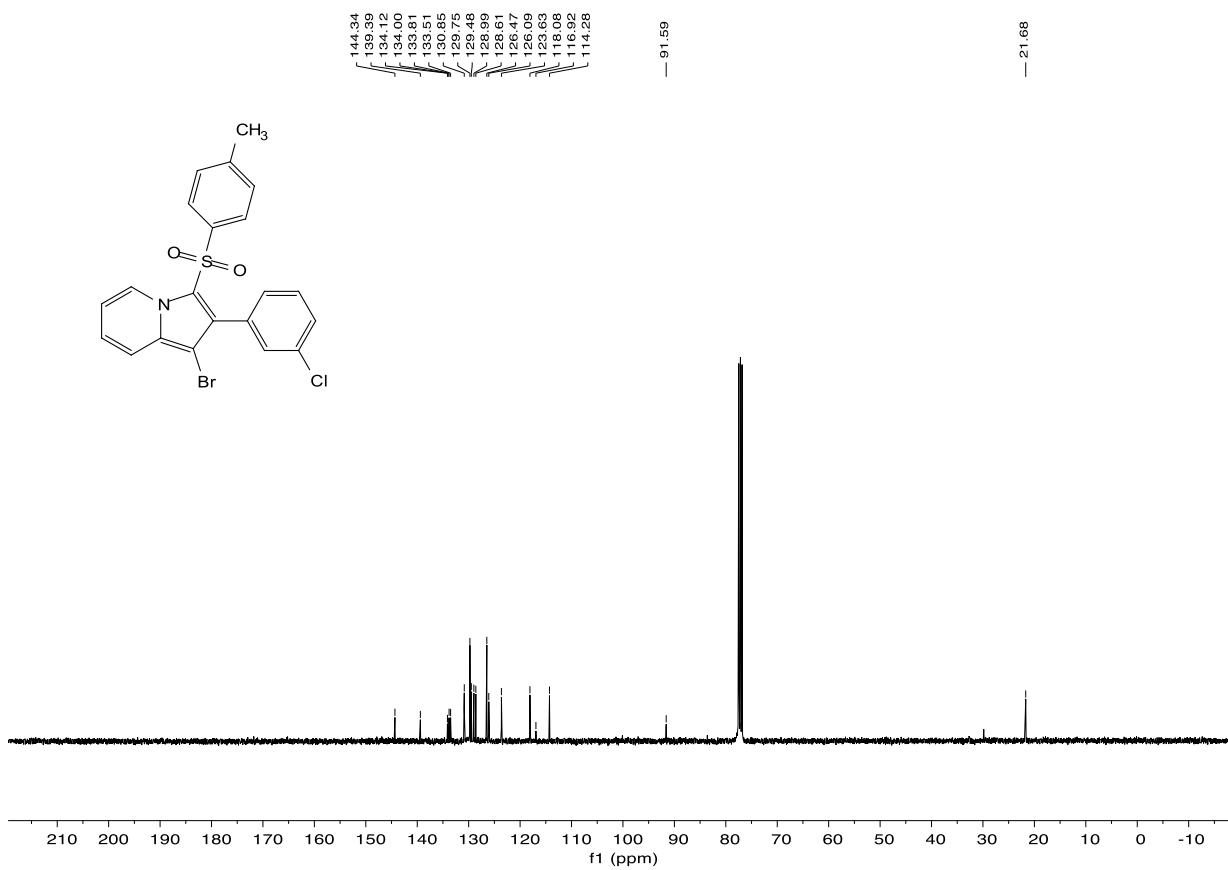

$^1\text{H}$  NMR (400 MHz,  $\text{CDCl}_3$ ),  $^{13}\text{C}$  NMR (100 MHz,  $\text{CDCl}_3$ ) spectrum of compound **3n**

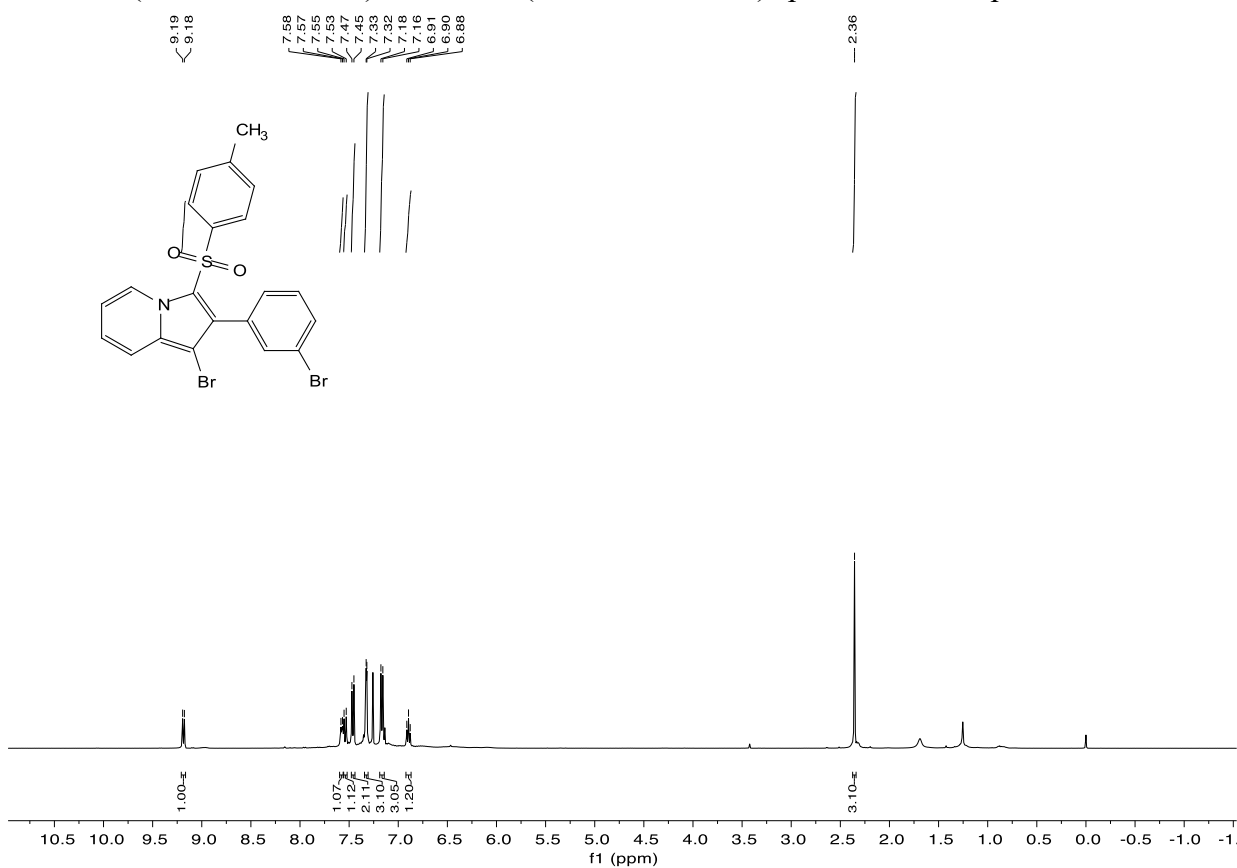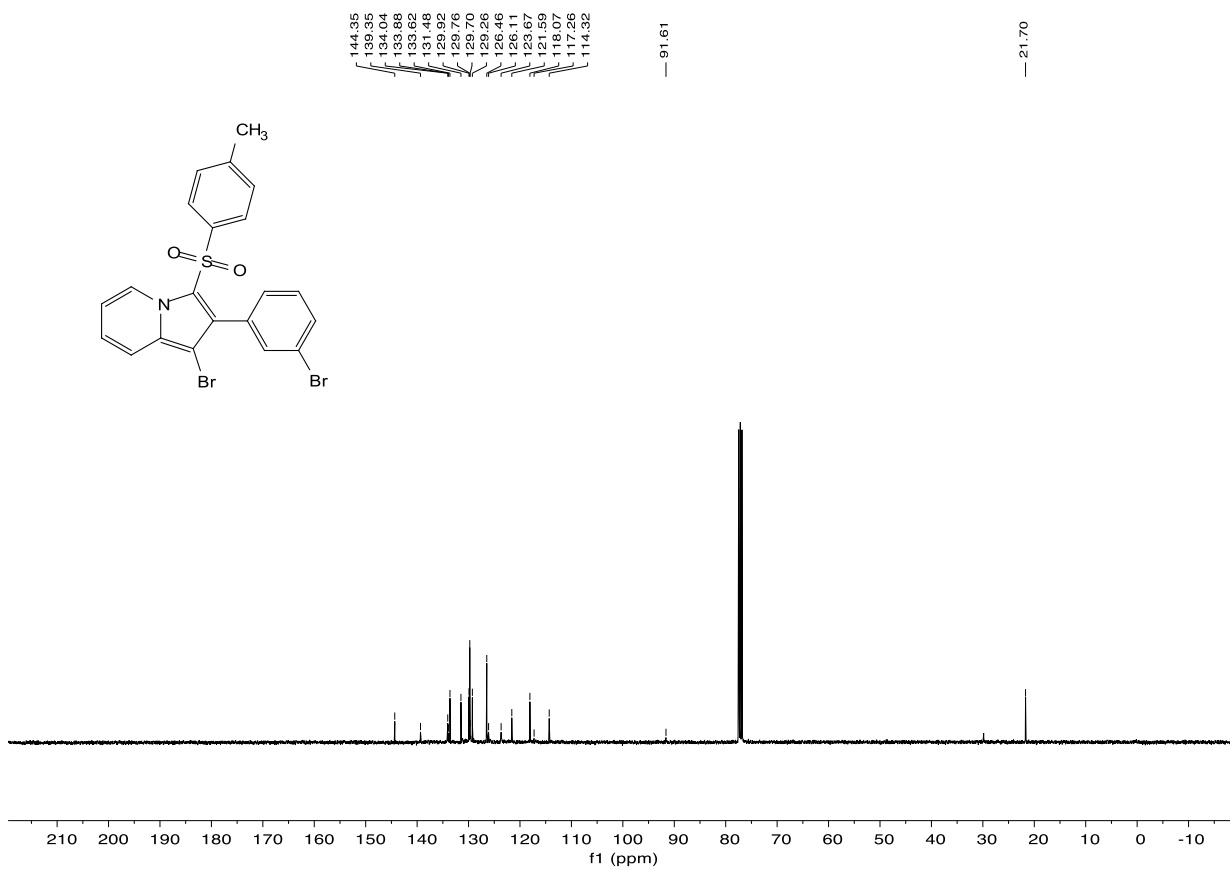

$^1\text{H}$  NMR (400 MHz,  $\text{CDCl}_3$ ),  $^{13}\text{C}$  NMR (100 MHz,  $\text{CDCl}_3$ ) spectrum of compound **3o**

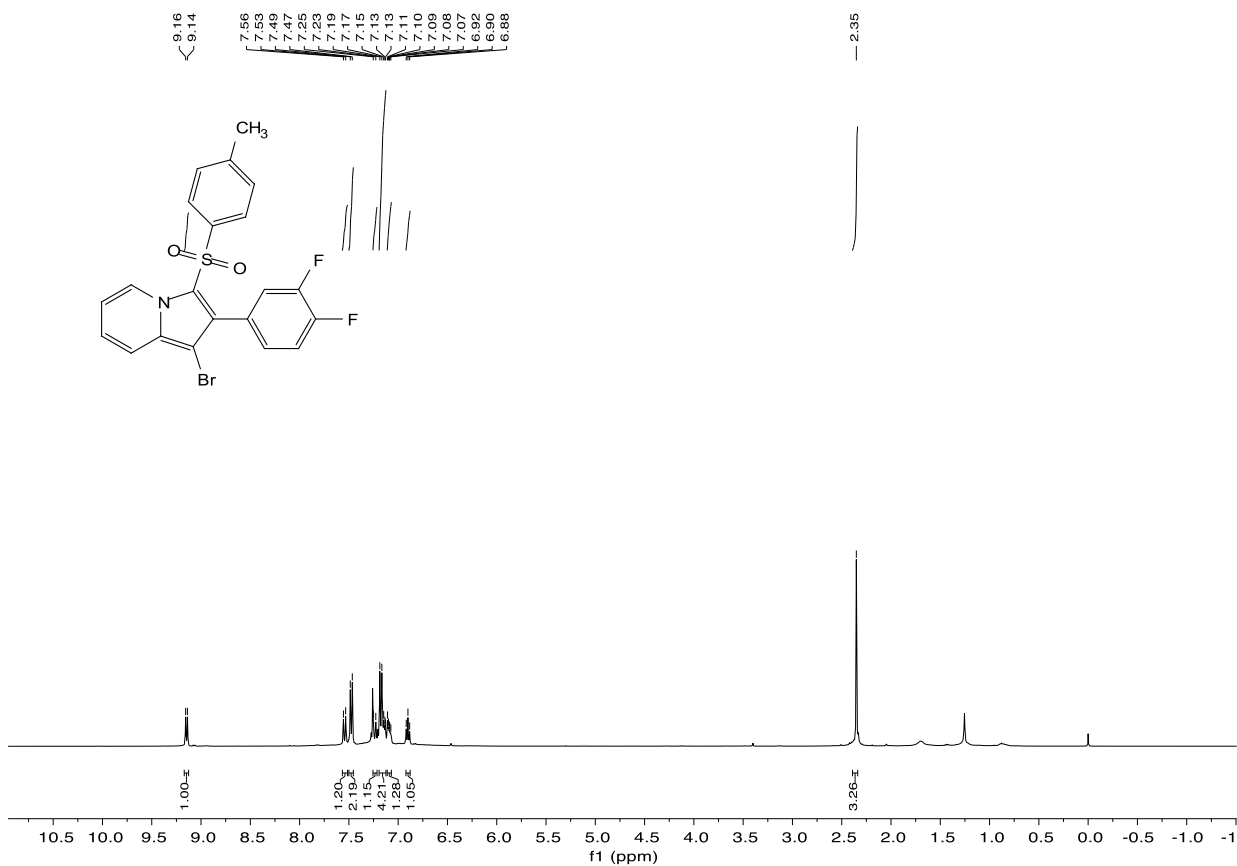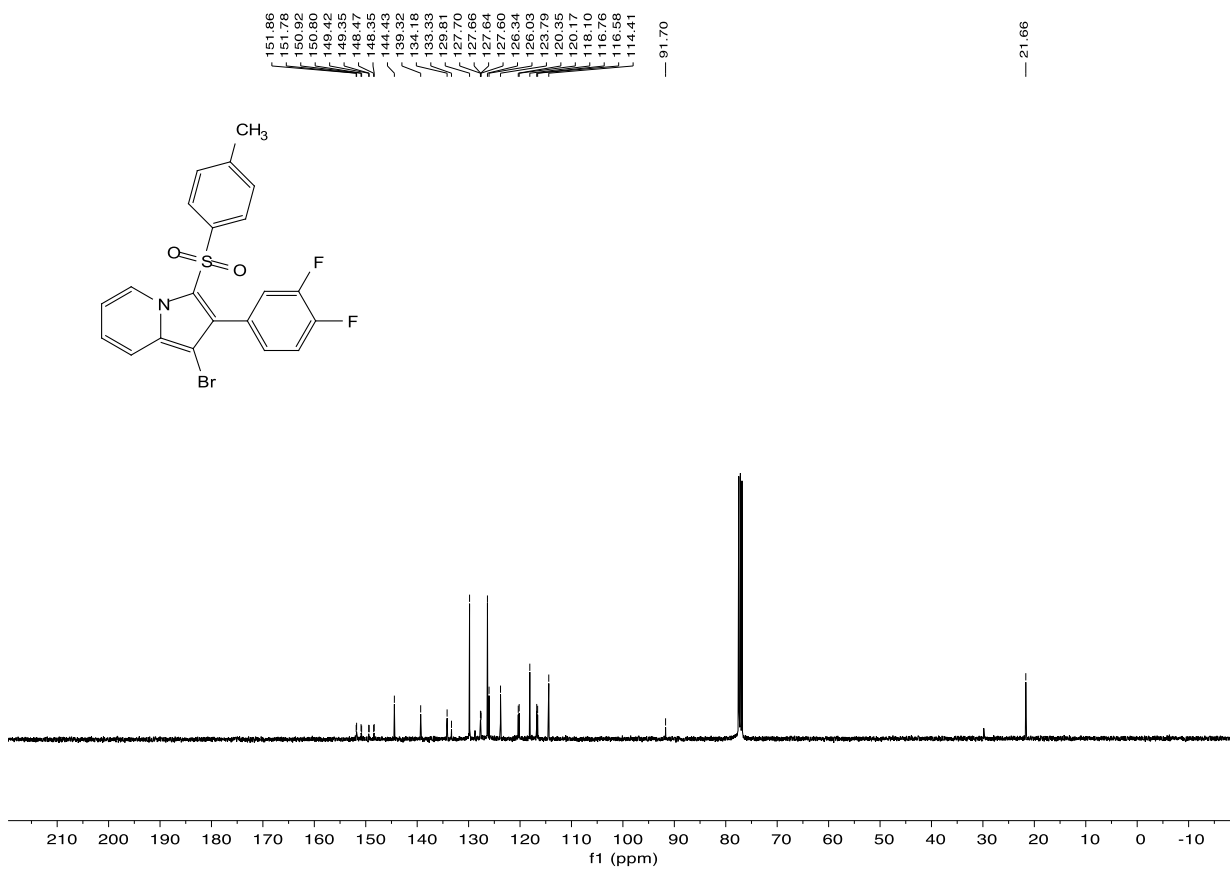

$^1\text{H}$  NMR (400 MHz,  $\text{CDCl}_3$ ),  $^{13}\text{C}$  NMR (100 MHz,  $\text{CDCl}_3$ ) spectrum of compound **3p**

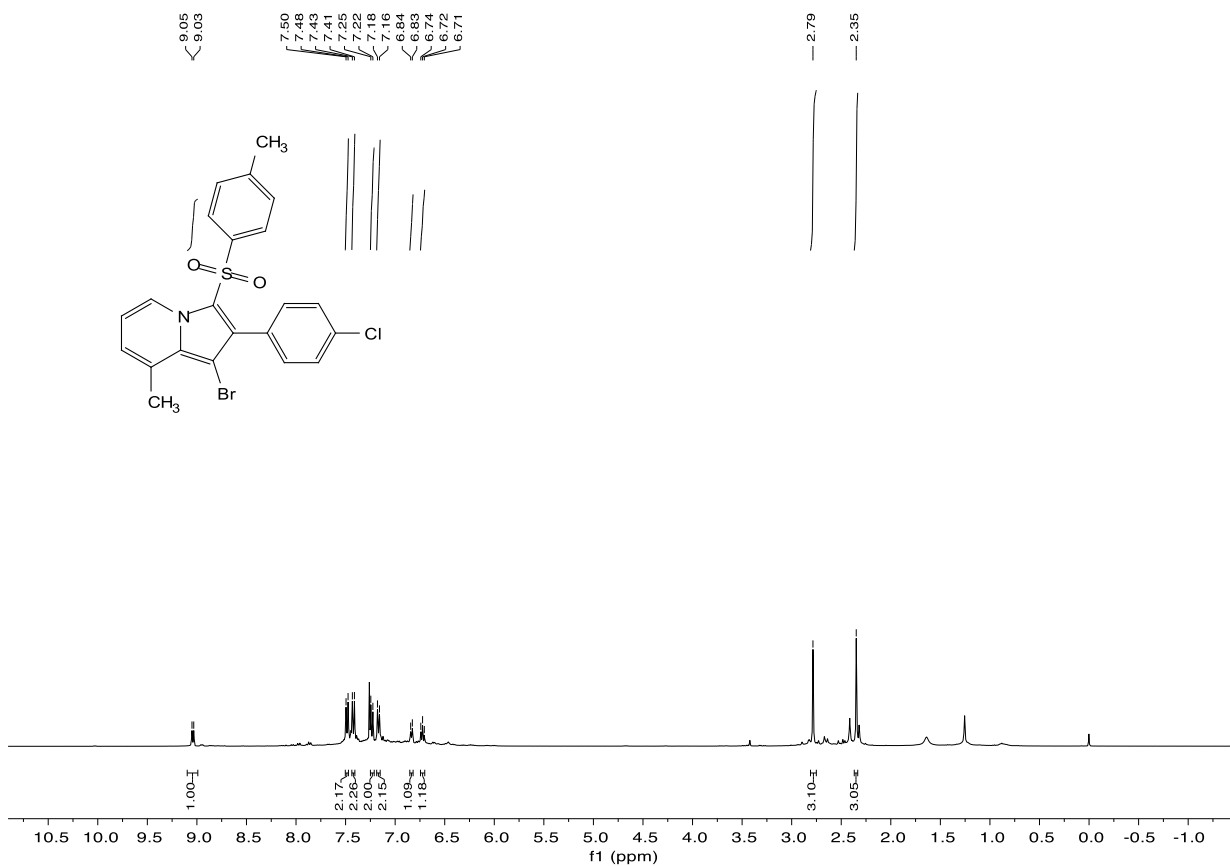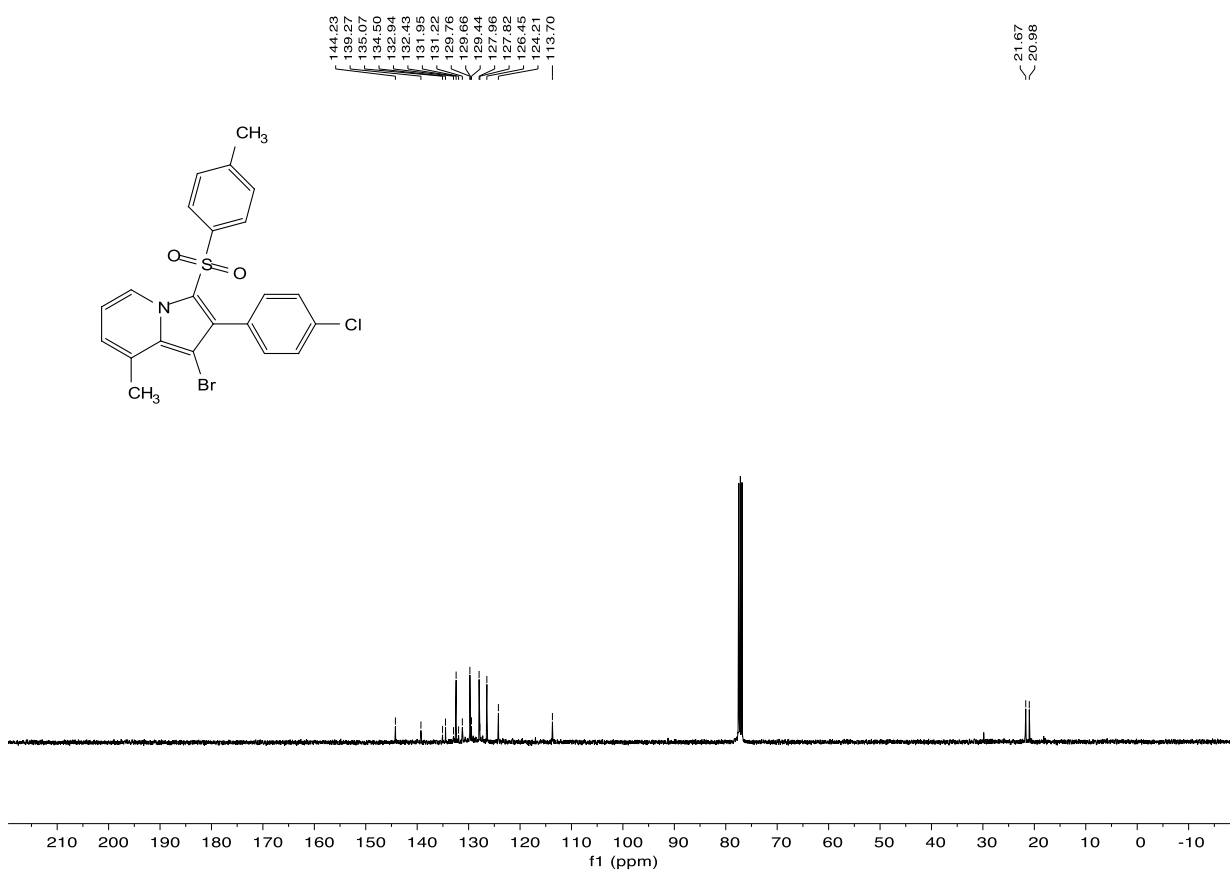

$^1\text{H}$  NMR (400 MHz,  $\text{CDCl}_3$ ),  $^{13}\text{C}$  NMR (100 MHz,  $\text{CDCl}_3$ ) spectrum of compound **3q**

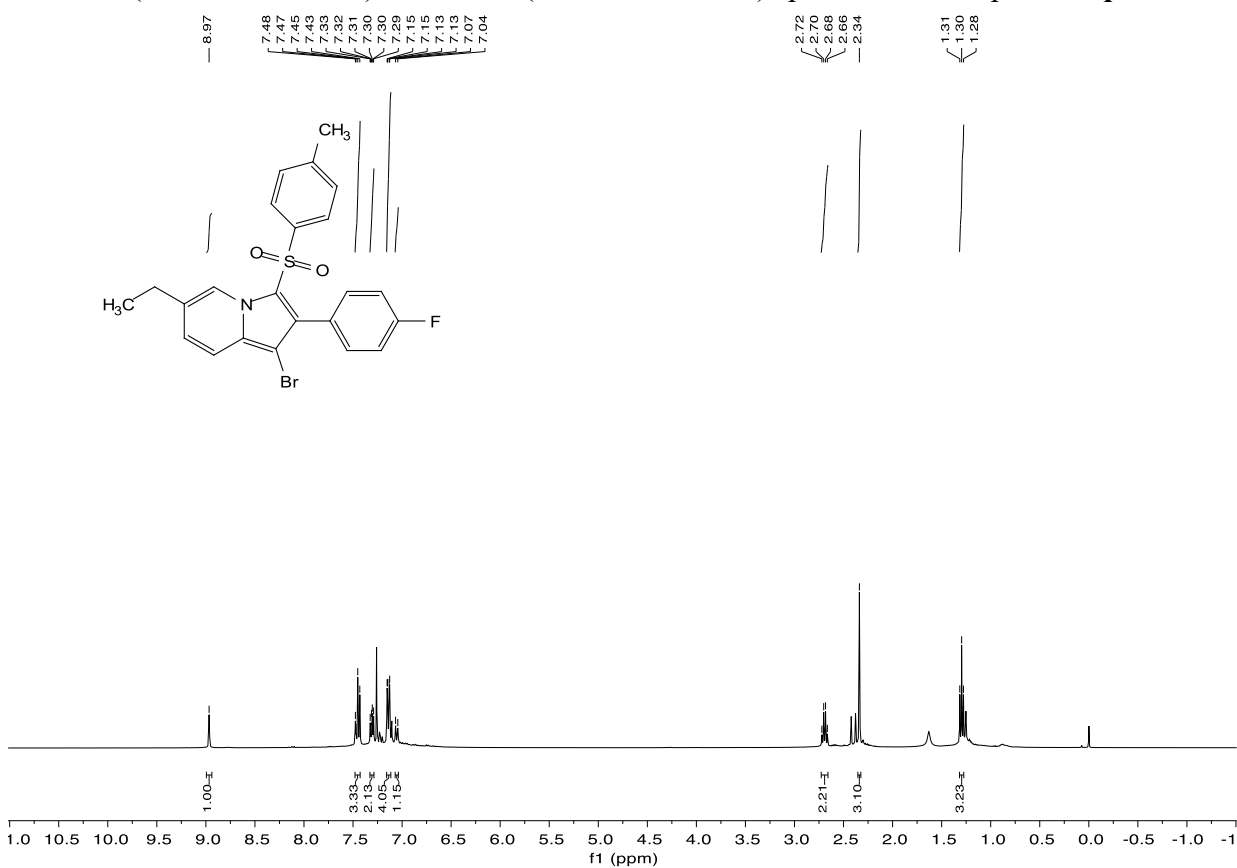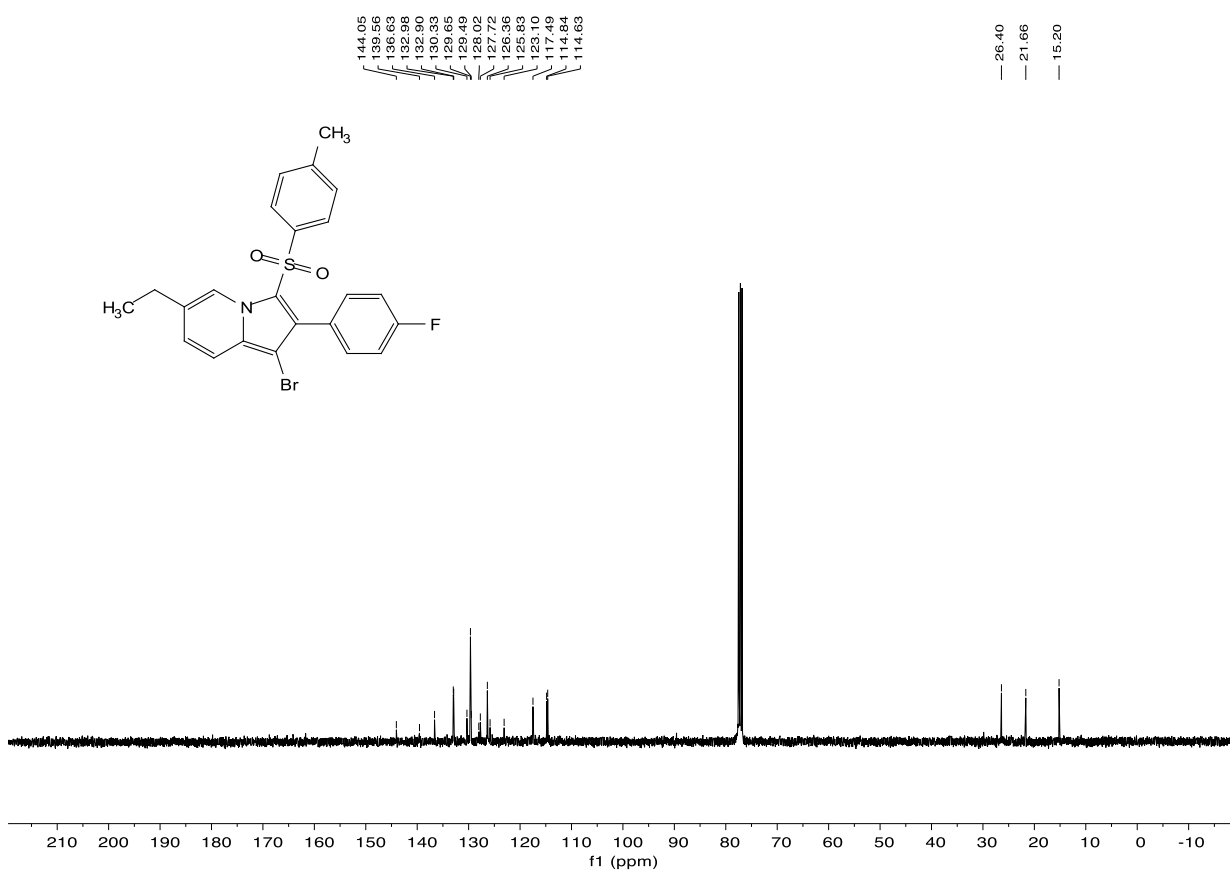



$^1\text{H}$  NMR (400 MHz,  $\text{CDCl}_3$ ),  $^{13}\text{C}$  NMR (100 MHz,  $\text{CDCl}_3$ ) spectrum of compound **3r**

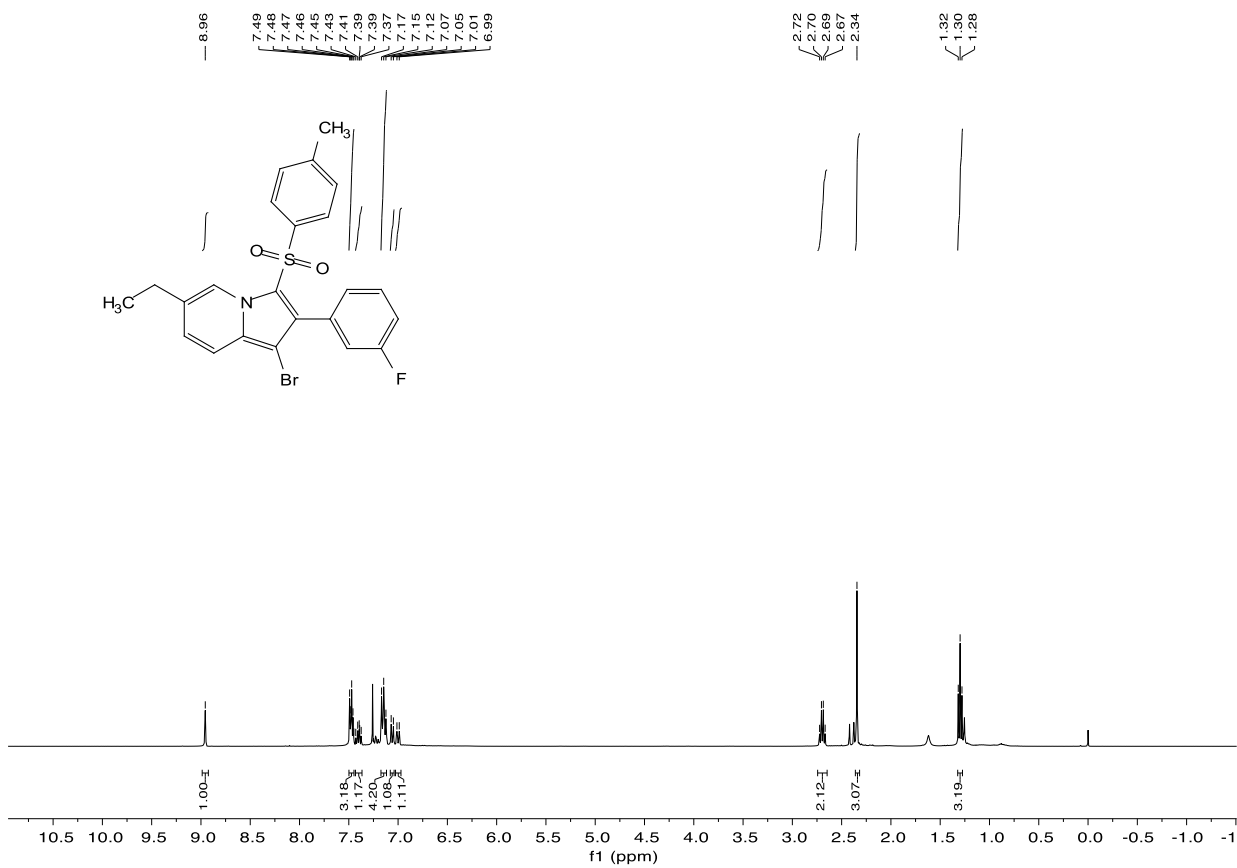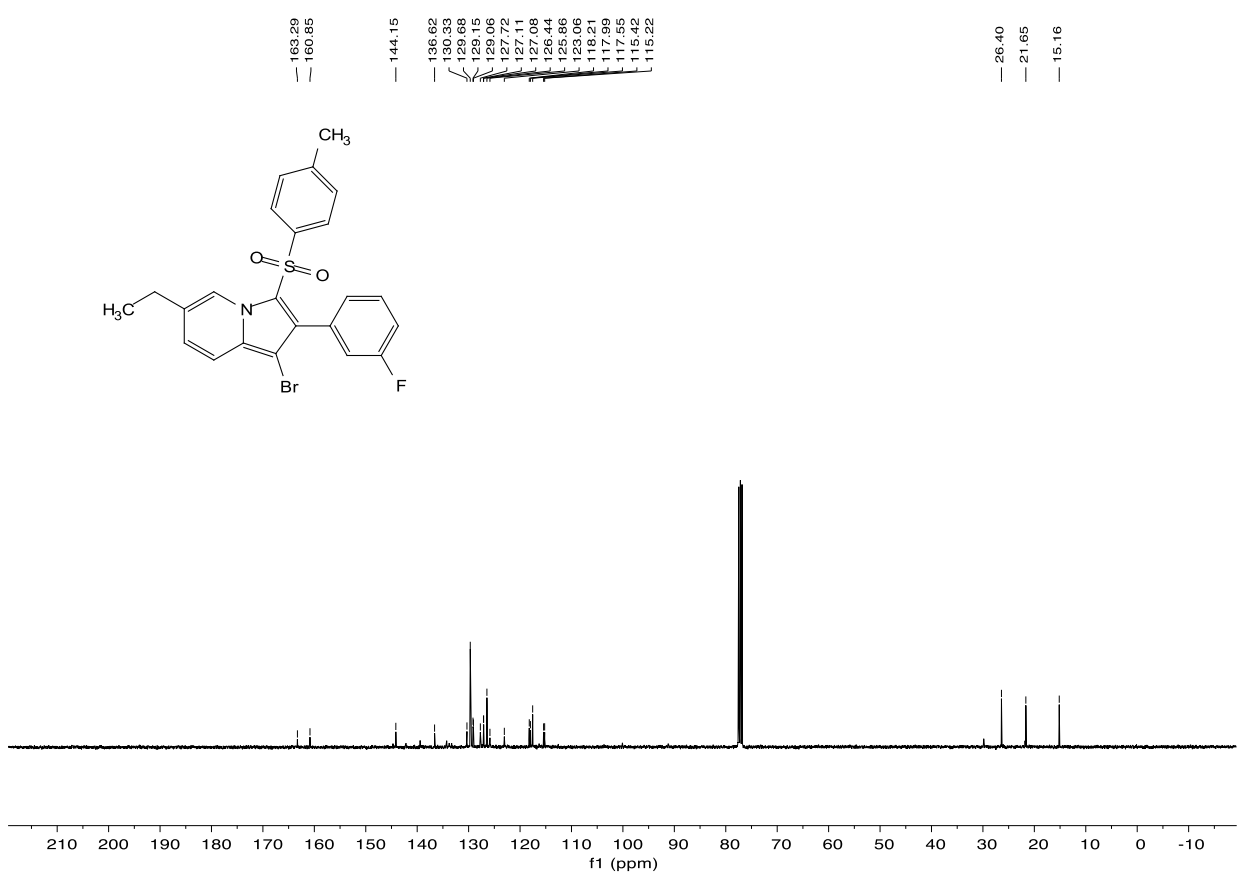

$^1\text{H}$  NMR (400 MHz,  $\text{CDCl}_3$ ),  $^{13}\text{C}$  NMR (100 MHz,  $\text{CDCl}_3$ ) spectrum of compound **4a**

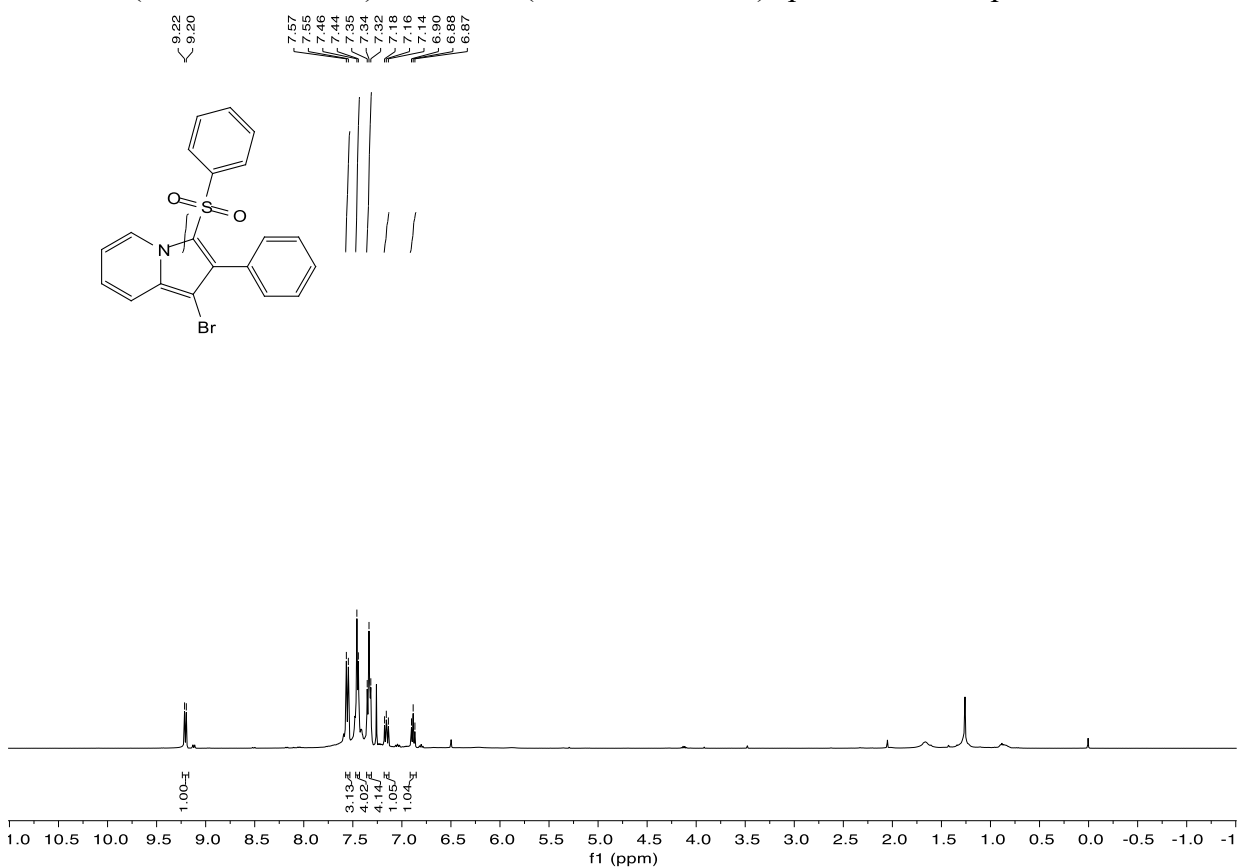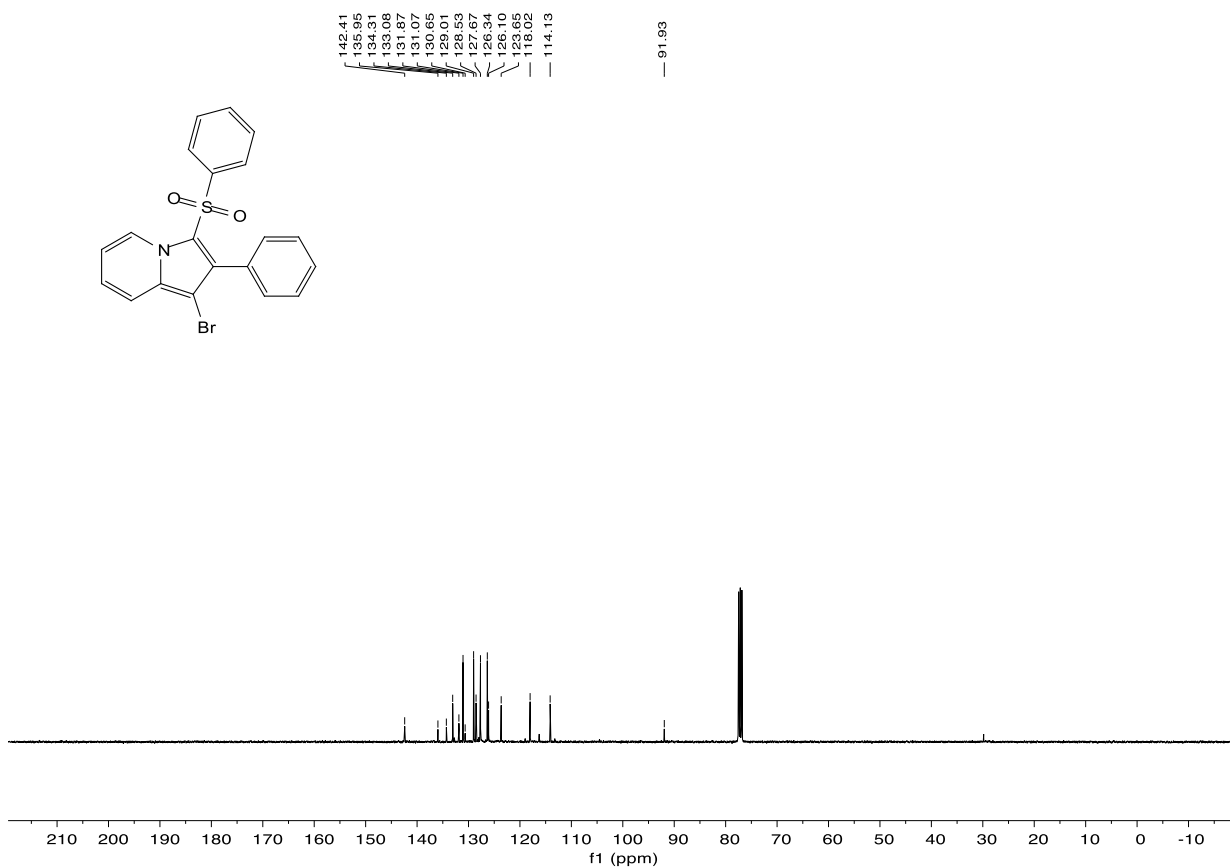

$^1\text{H}$  NMR (400 MHz,  $\text{CDCl}_3$ ),  $^{13}\text{C}$  NMR (100 MHz,  $\text{CDCl}_3$ ) spectrum of compound **4b**

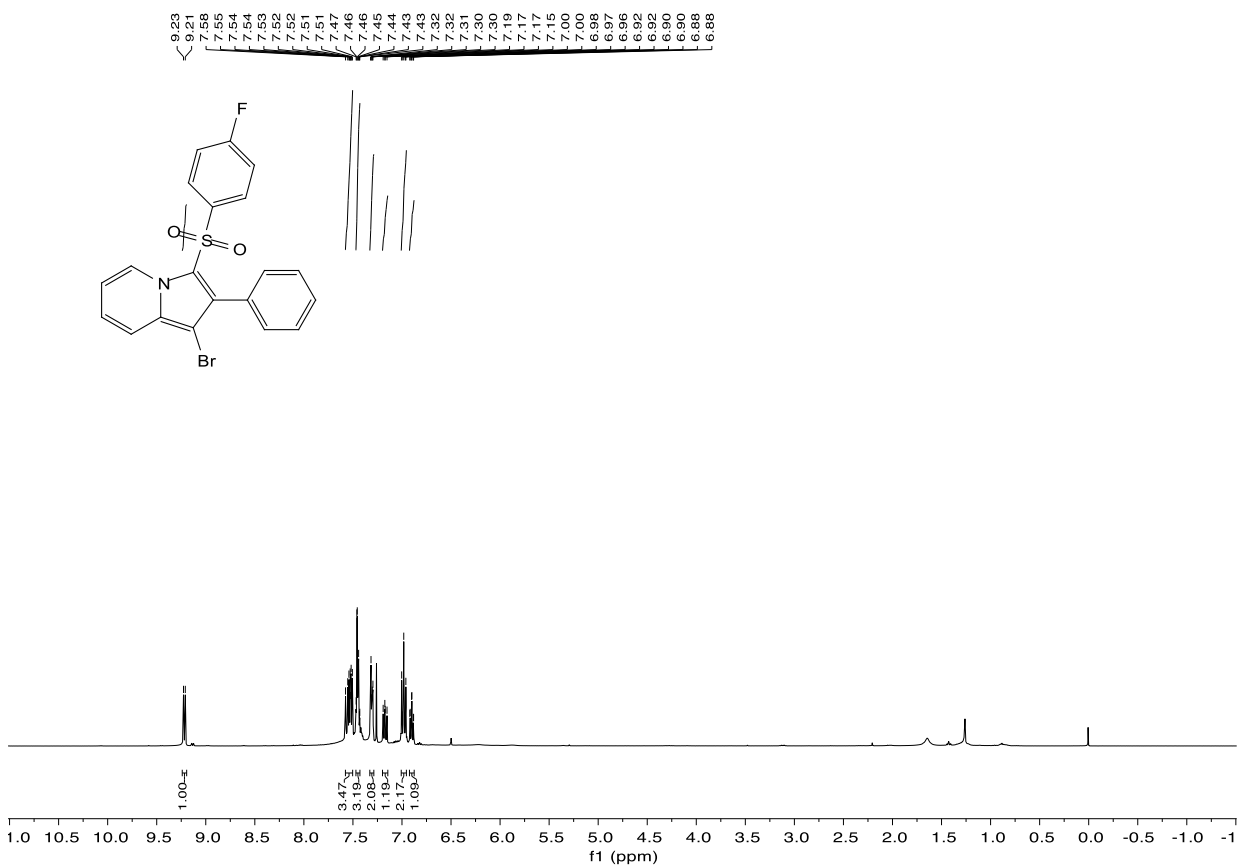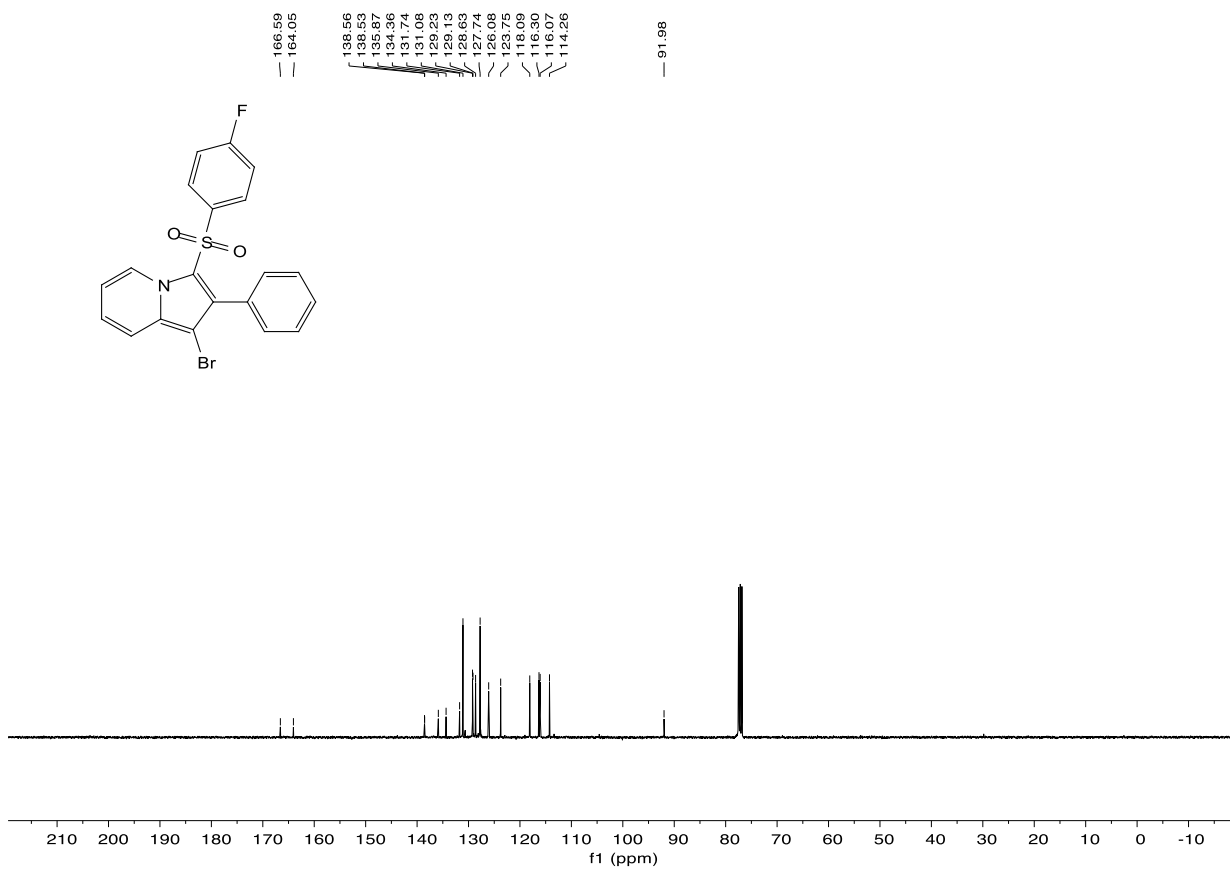

$^1\text{H}$  NMR (400 MHz,  $\text{CDCl}_3$ ),  $^{13}\text{C}$  NMR (100 MHz,  $\text{CDCl}_3$ ) spectrum of compound **4c**

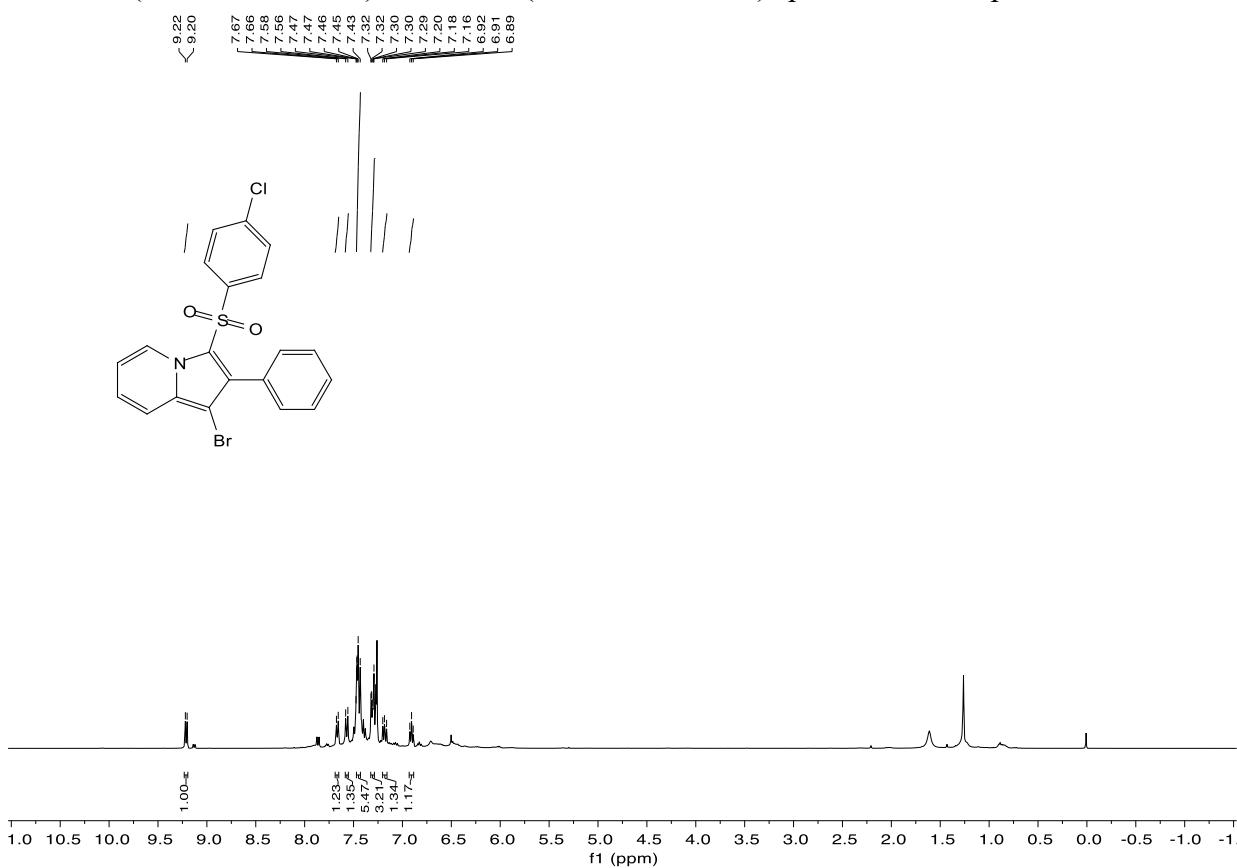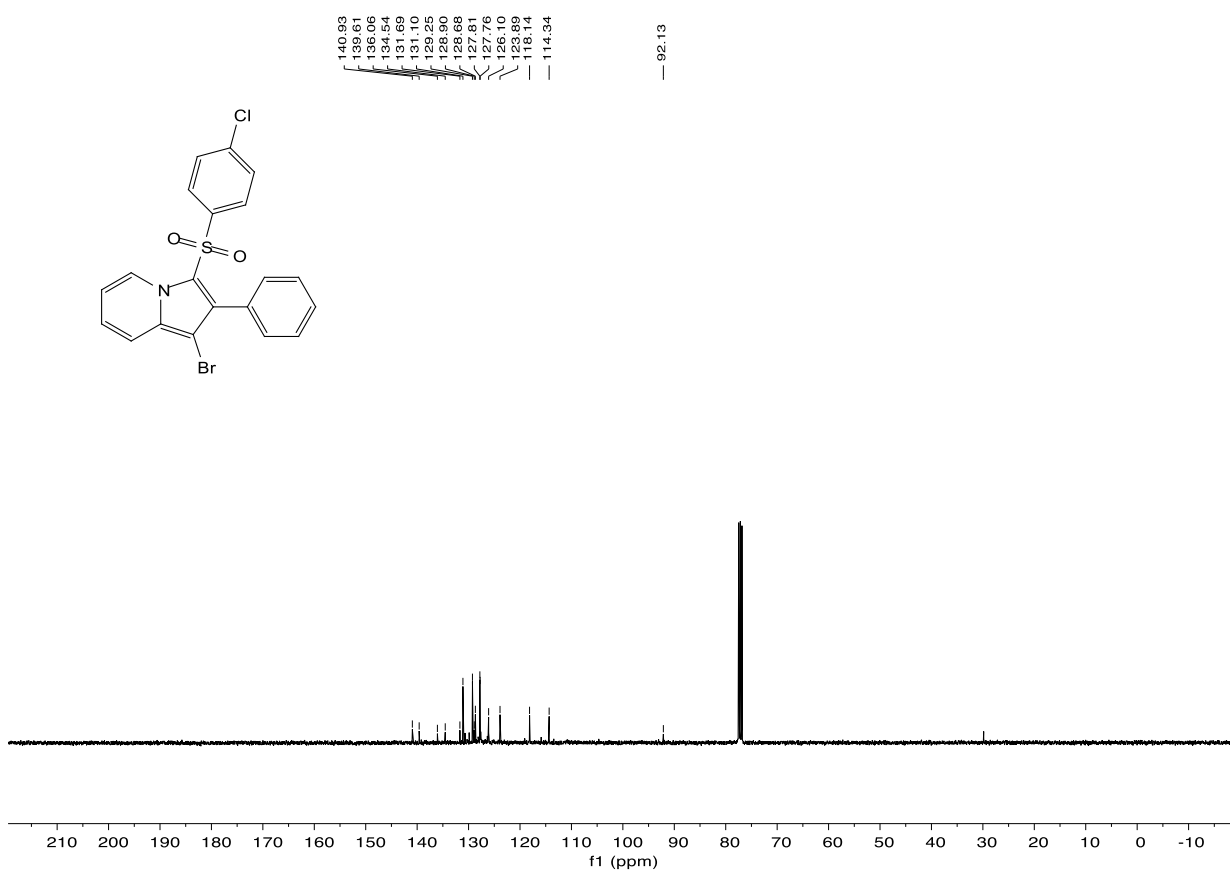

$^1\text{H}$  NMR (400 MHz,  $\text{CDCl}_3$ ),  $^{13}\text{C}$  NMR (100 MHz,  $\text{CDCl}_3$ ) spectrum of compound **4d**

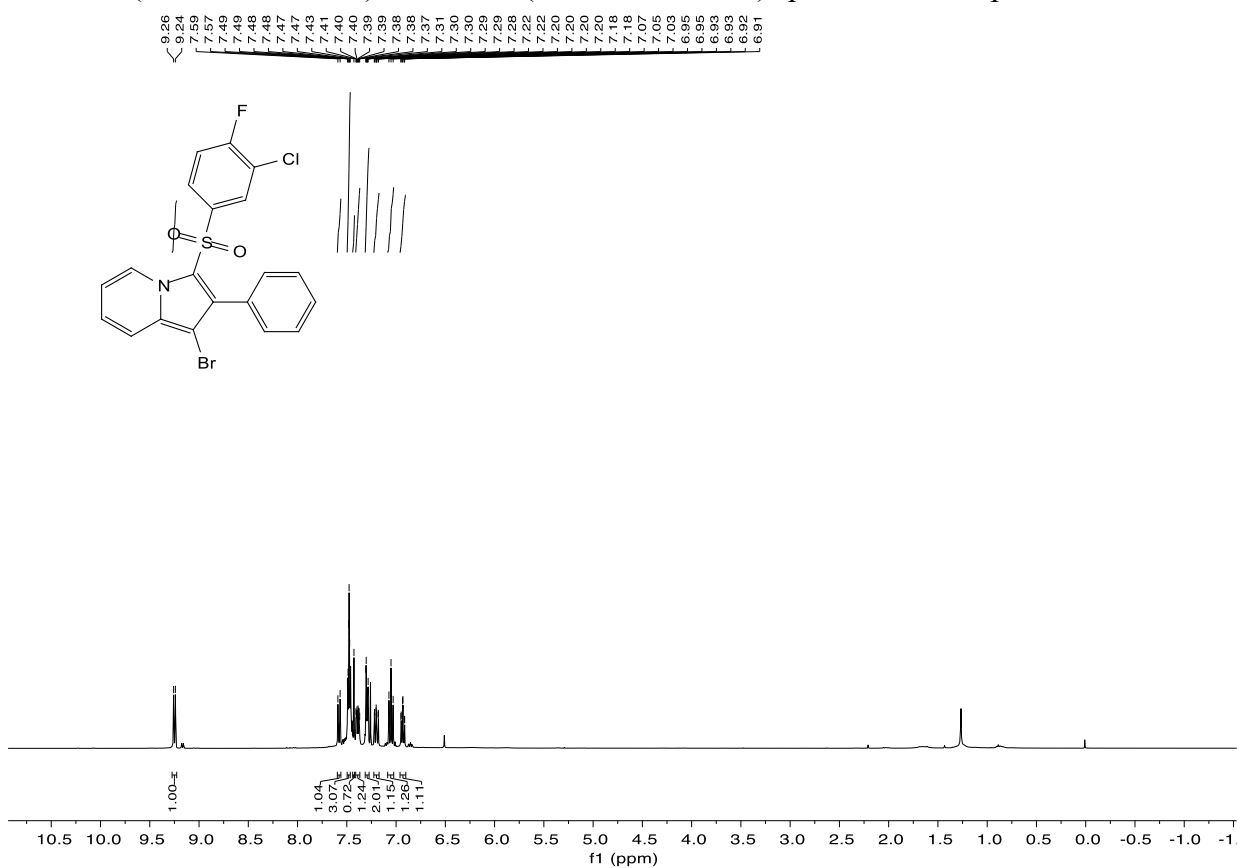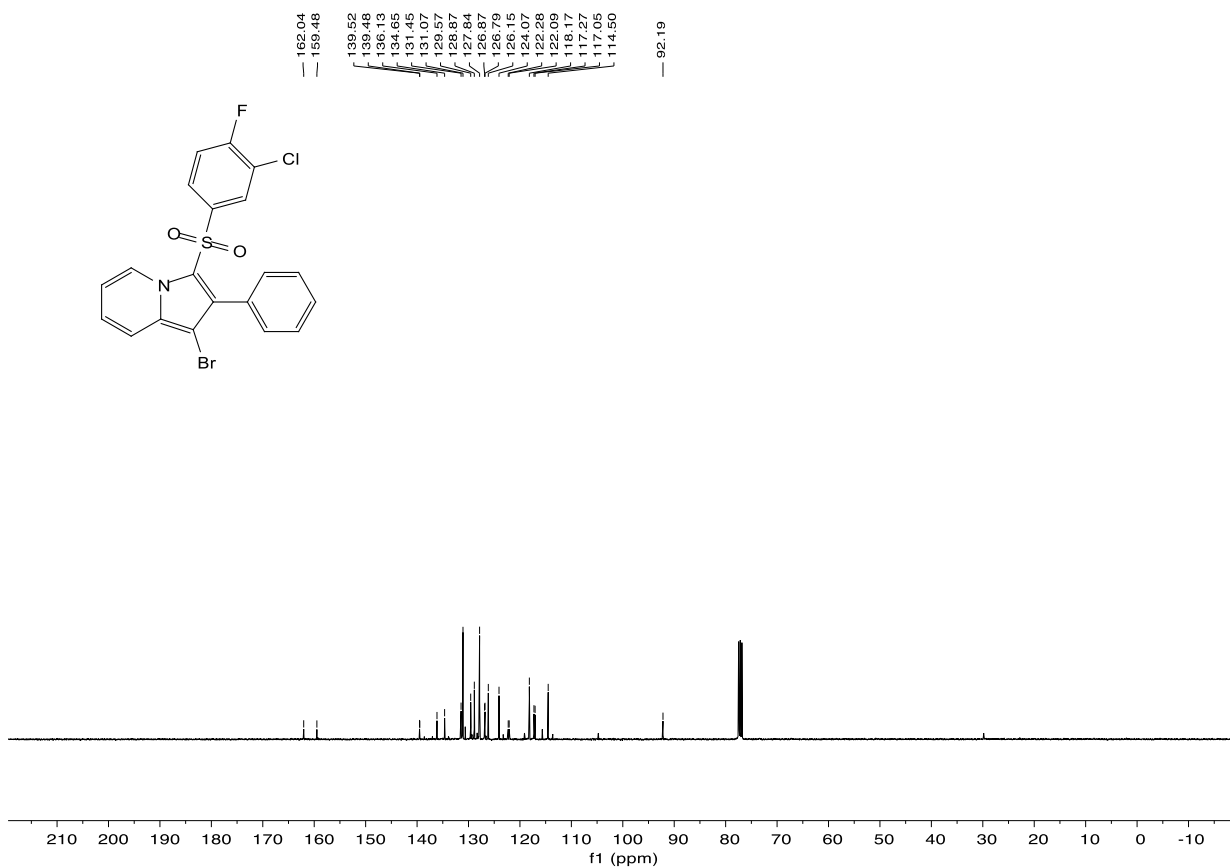

$^1\text{H}$  NMR (400 MHz,  $\text{CDCl}_3$ ),  $^{13}\text{C}$  NMR (100 MHz,  $\text{CDCl}_3$ ) spectrum of compound **4e**

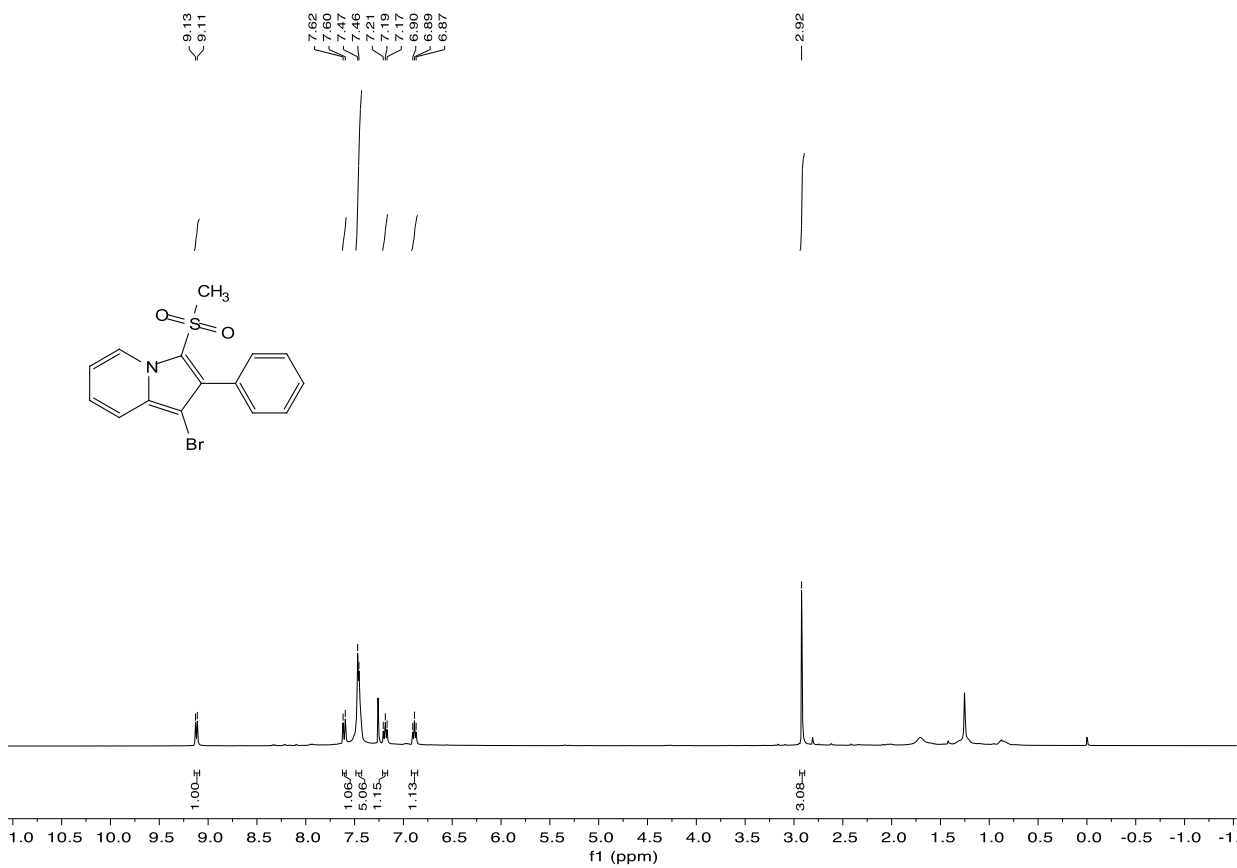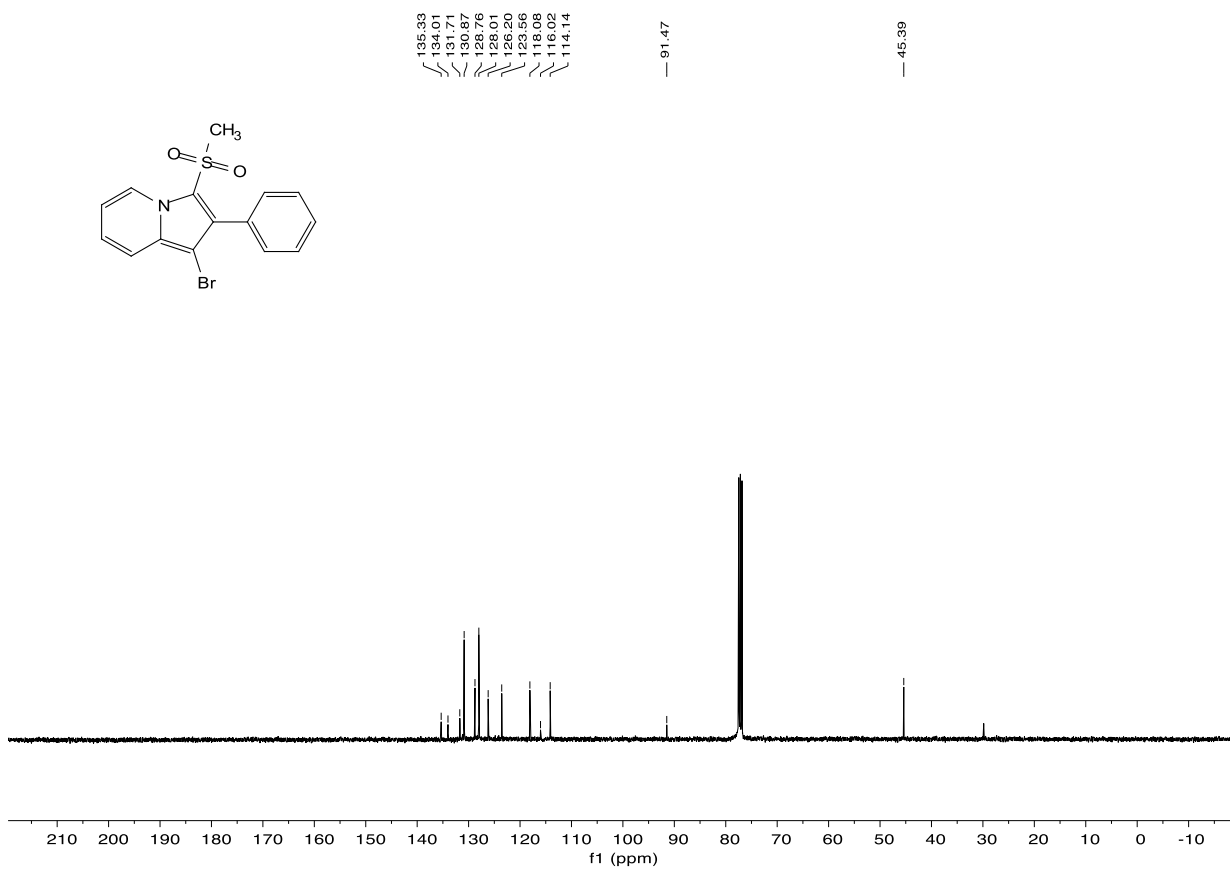

$^1\text{H}$  NMR (400 MHz,  $\text{CDCl}_3$ ),  $^{13}\text{C}$  NMR (100 MHz,  $\text{CDCl}_3$ ) spectrum of compound **4f**

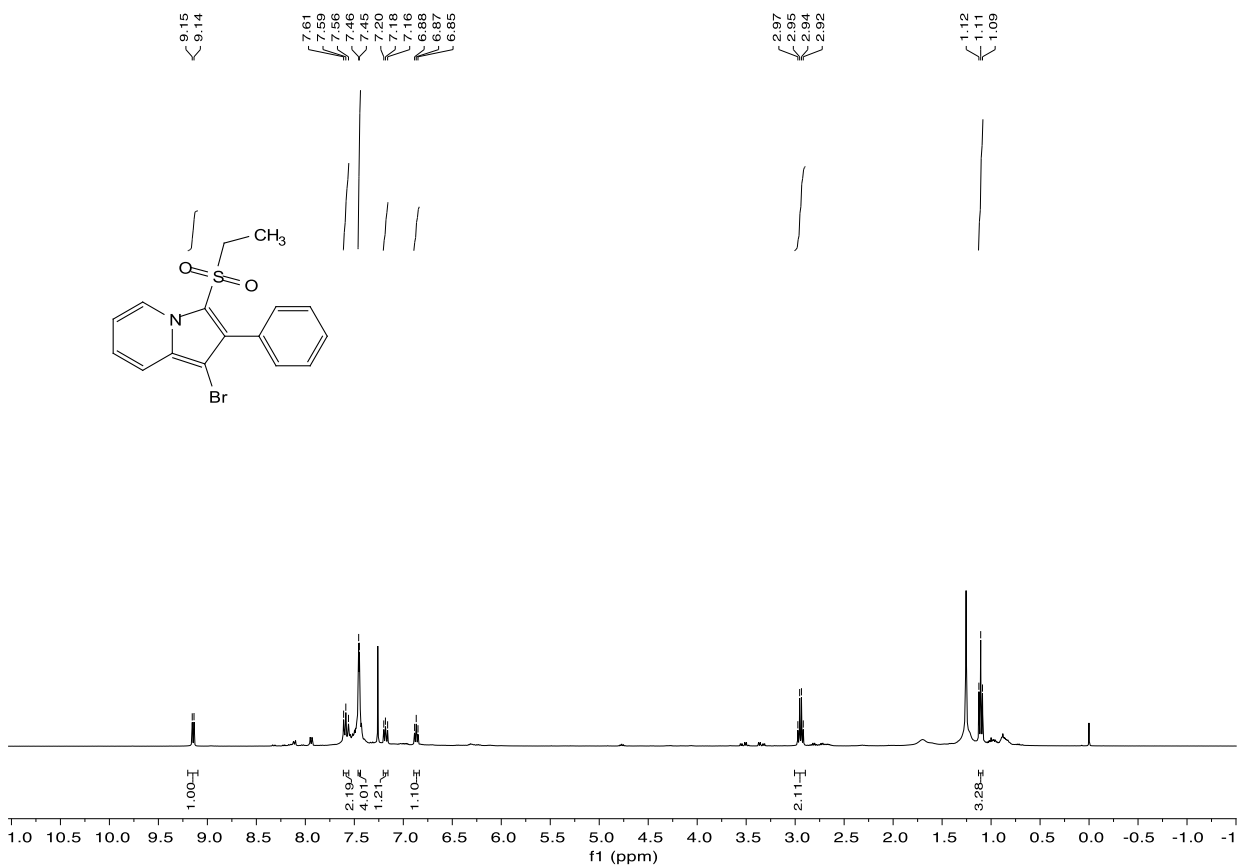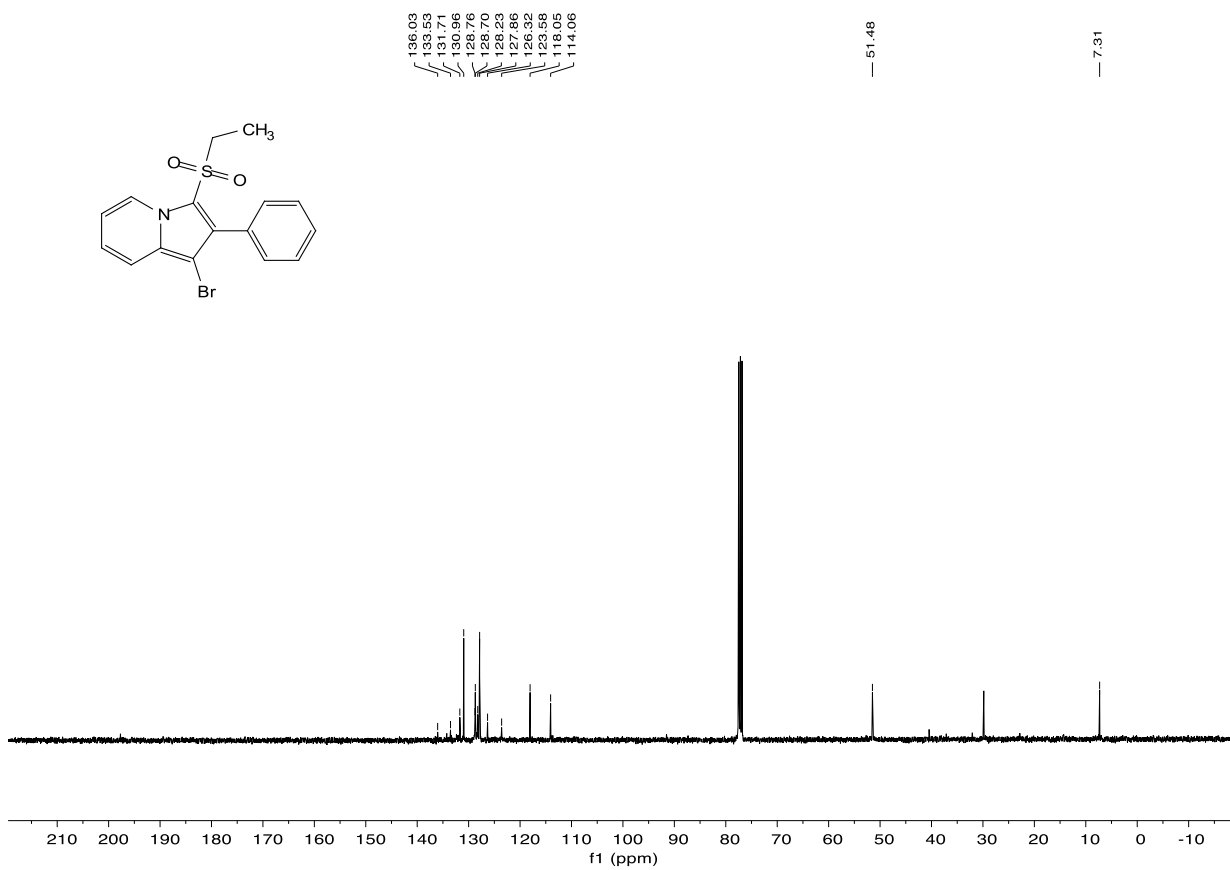

$^1\text{H}$  NMR (400 MHz,  $\text{CDCl}_3$ ),  $^{13}\text{C}$  NMR (100 MHz,  $\text{CDCl}_3$ ) spectrum of compound **6a**

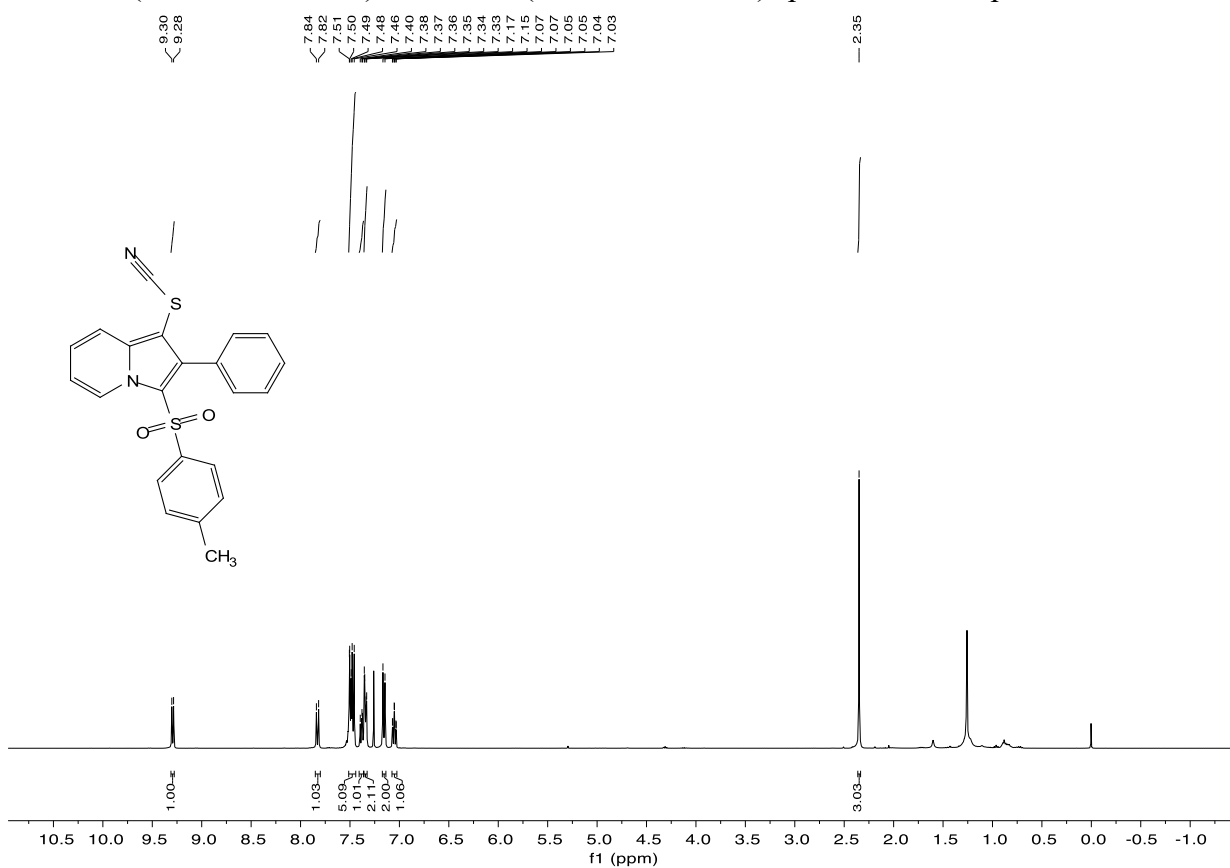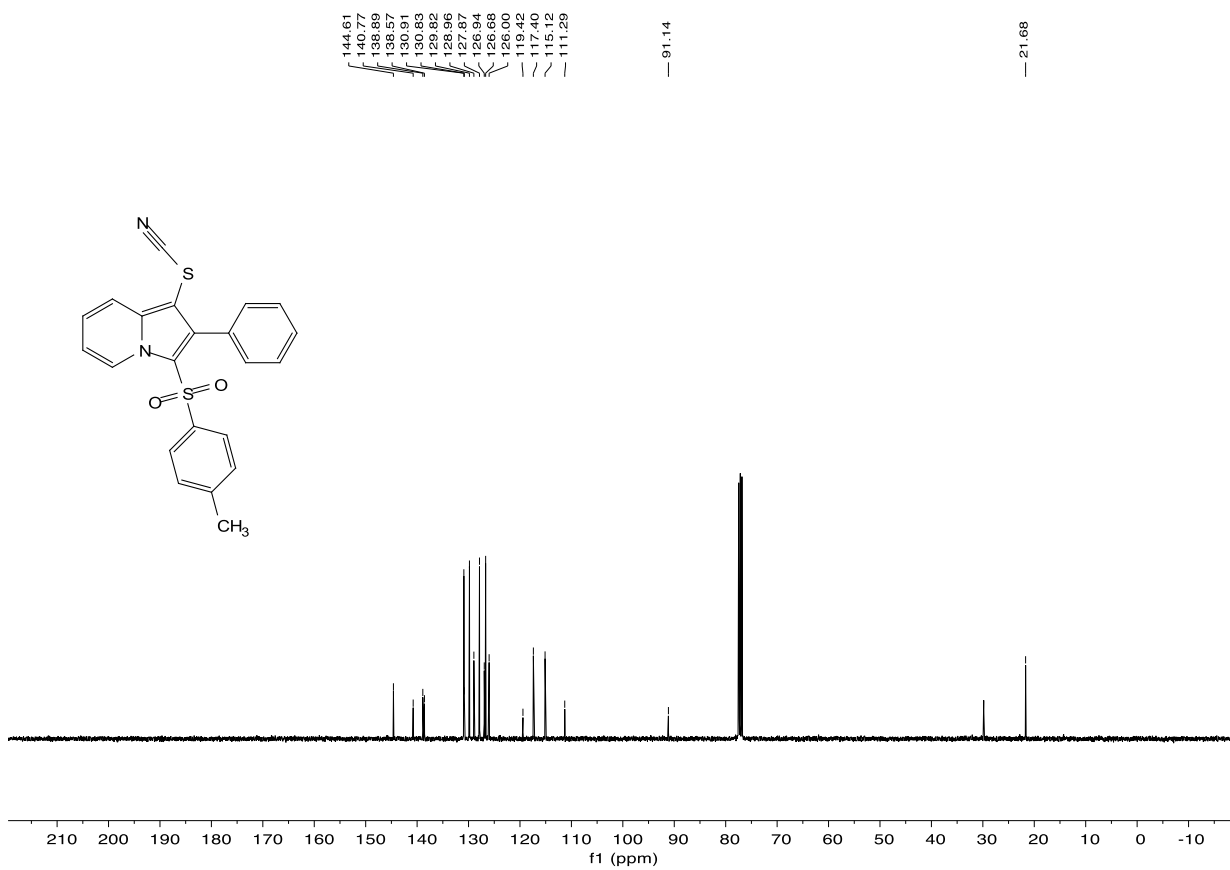



$^1\text{H}$  NMR (400 MHz,  $\text{CDCl}_3$ ),  $^{13}\text{C}$  NMR (100 MHz,  $\text{CDCl}_3$ ) spectrum of compound **6b**

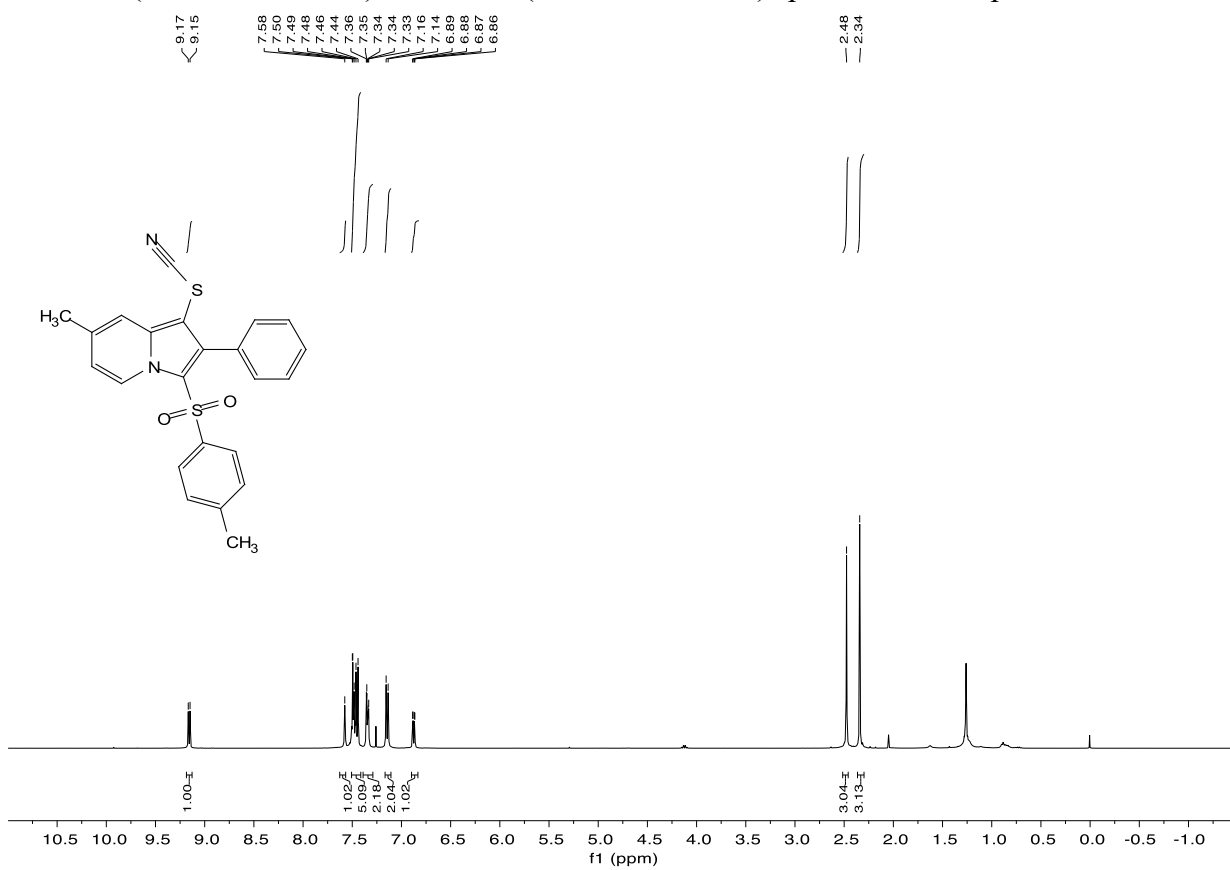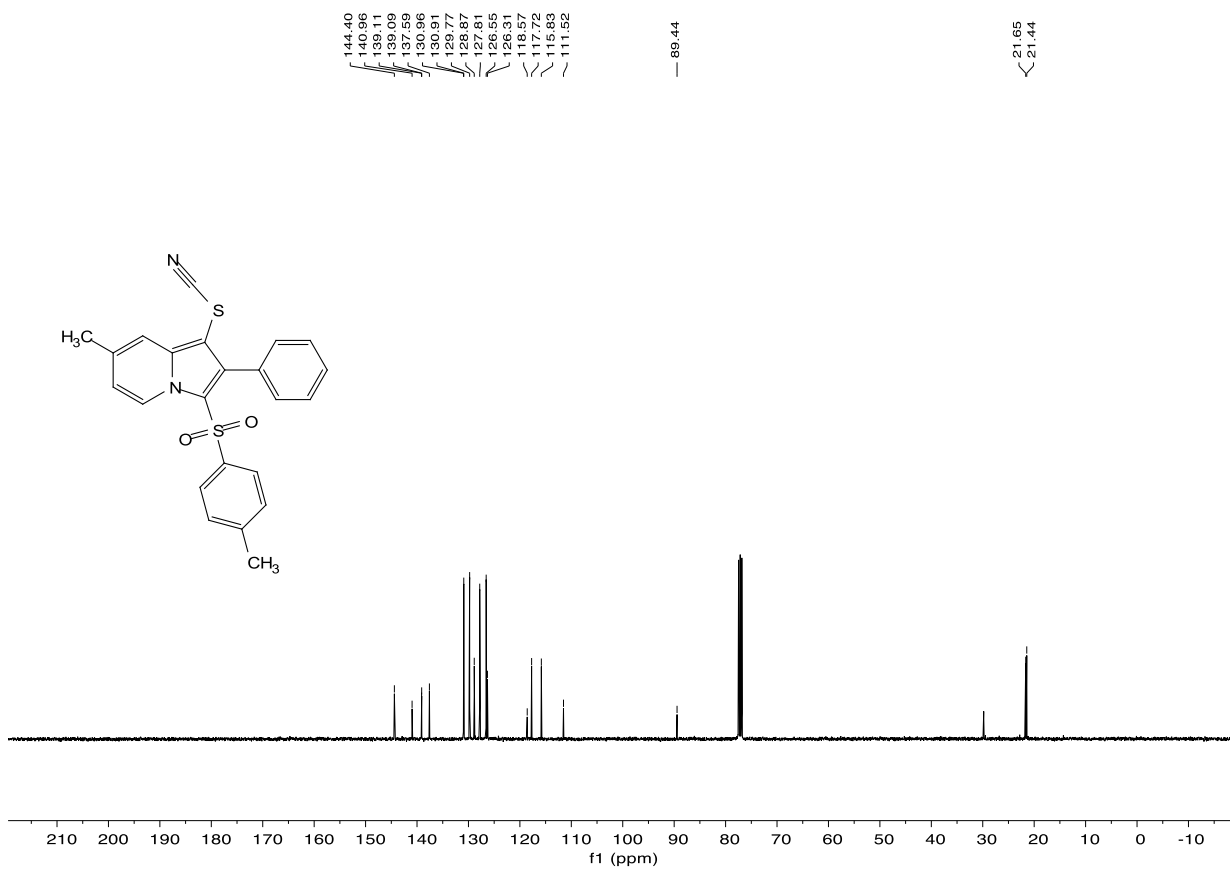

$^1\text{H}$  NMR (400 MHz,  $\text{CDCl}_3$ ),  $^{13}\text{C}$  NMR (100 MHz,  $\text{CDCl}_3$ ) spectrum of compound **6c**

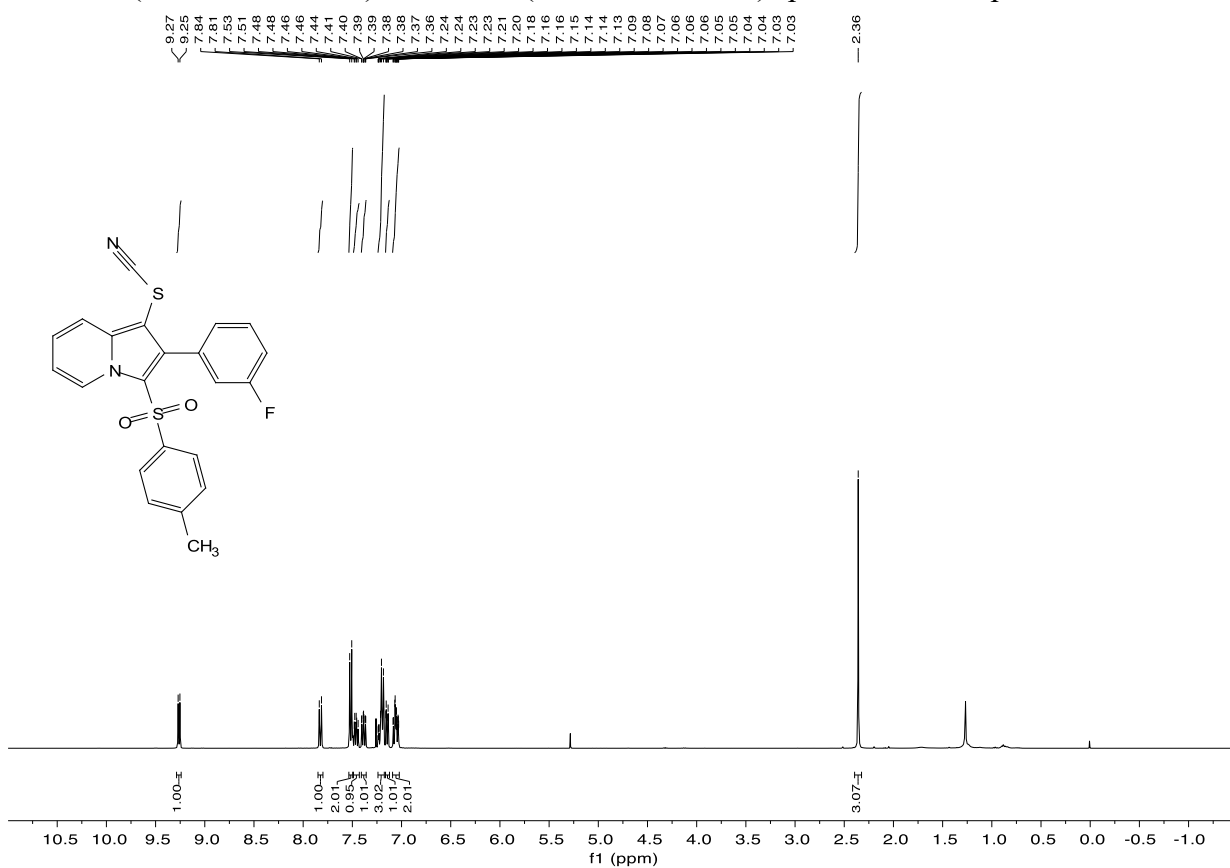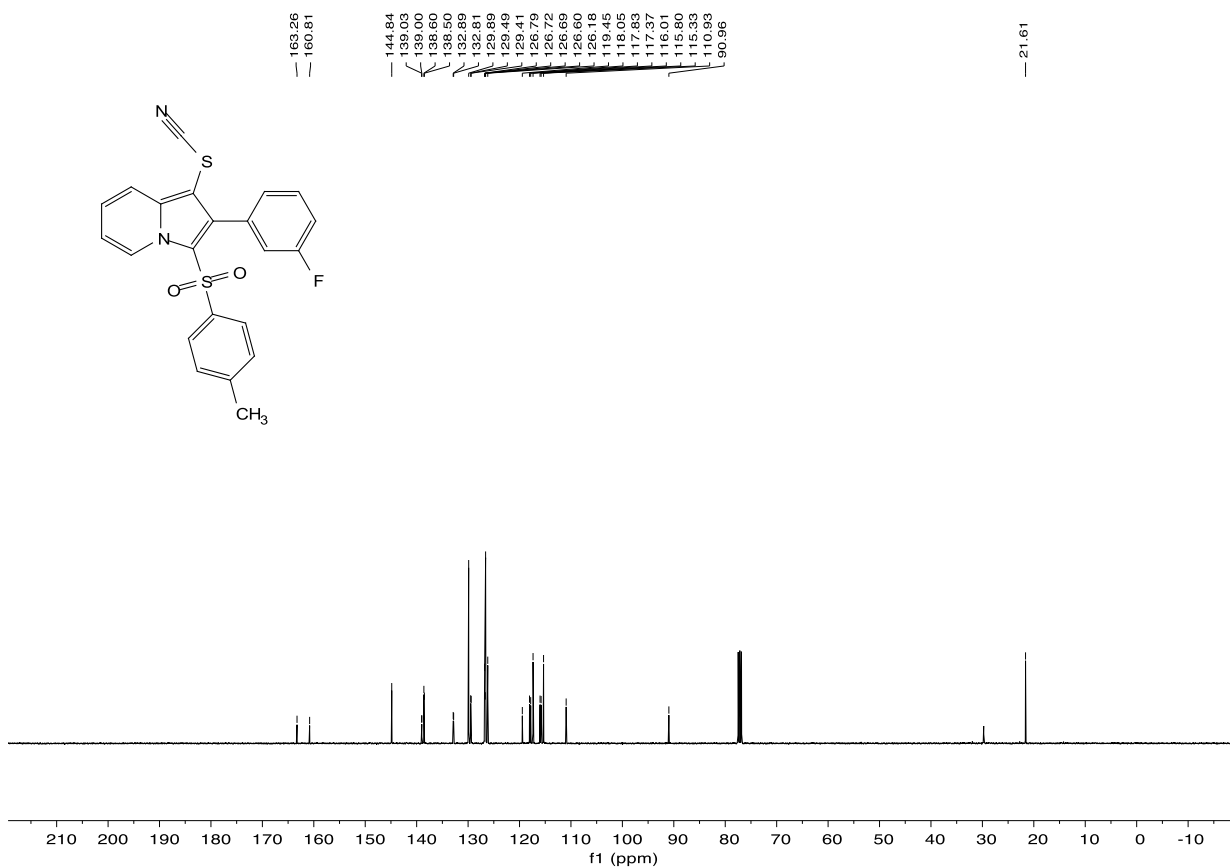

$^1\text{H}$  NMR (400 MHz,  $\text{CDCl}_3$ ),  $^{13}\text{C}$  NMR (100 MHz,  $\text{CDCl}_3$ ) spectrum of compound **7a**

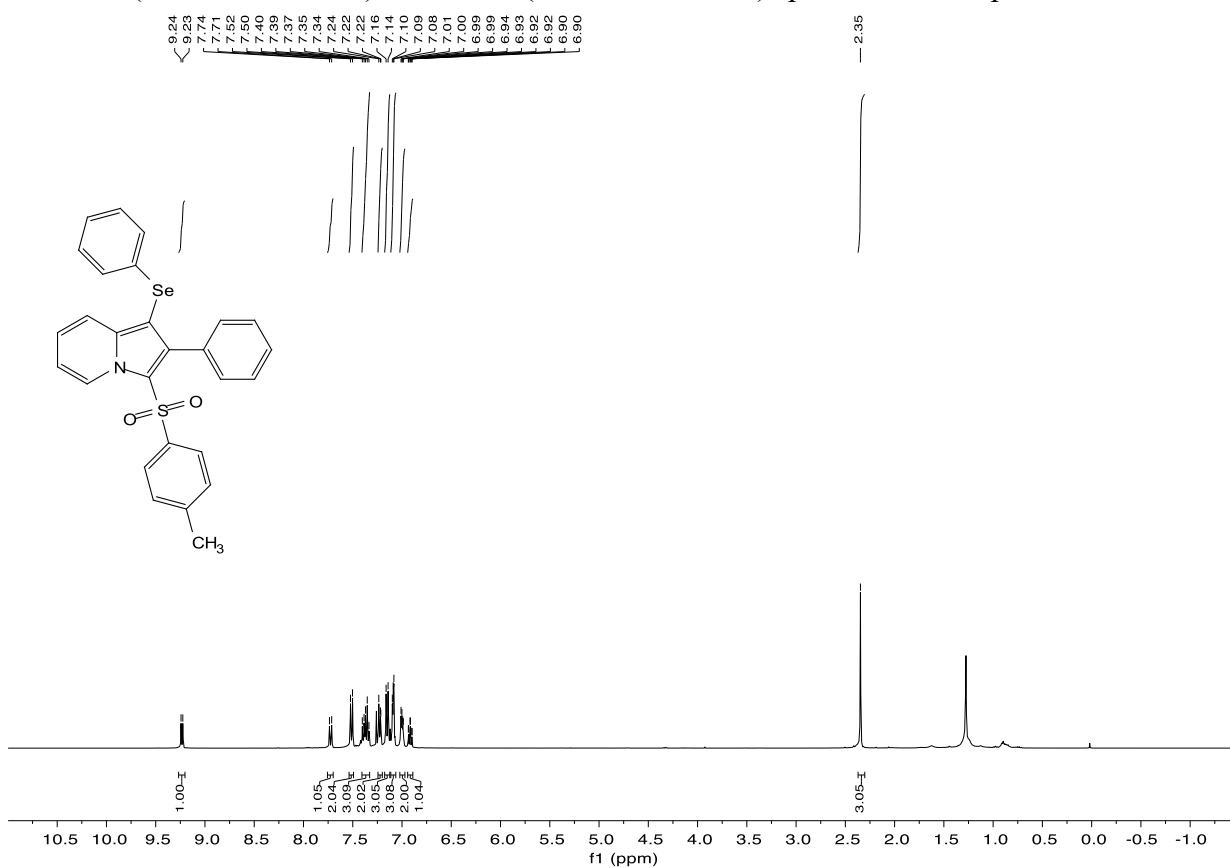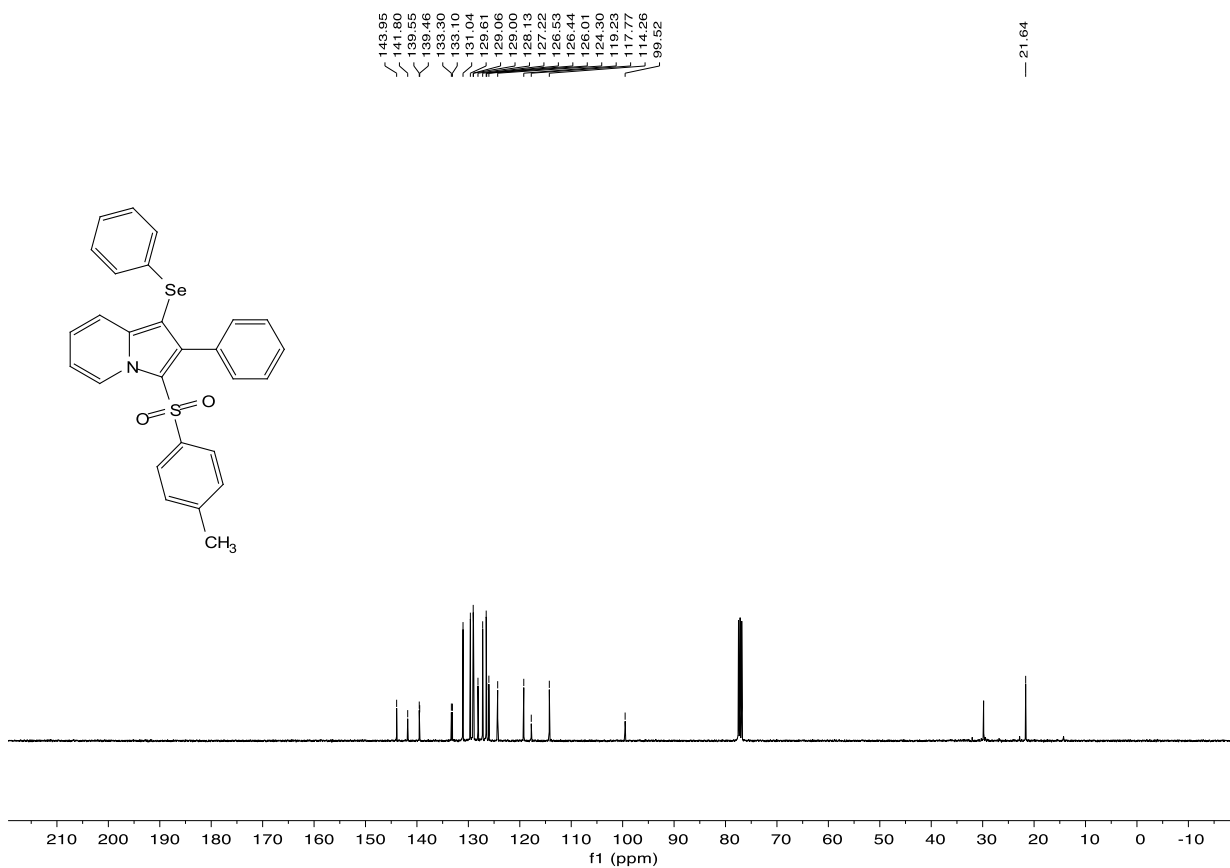

$^1\text{H}$  NMR (400 MHz,  $\text{CDCl}_3$ ),  $^{13}\text{C}$  NMR (100 MHz,  $\text{CDCl}_3$ ) spectrum of compound **7b**

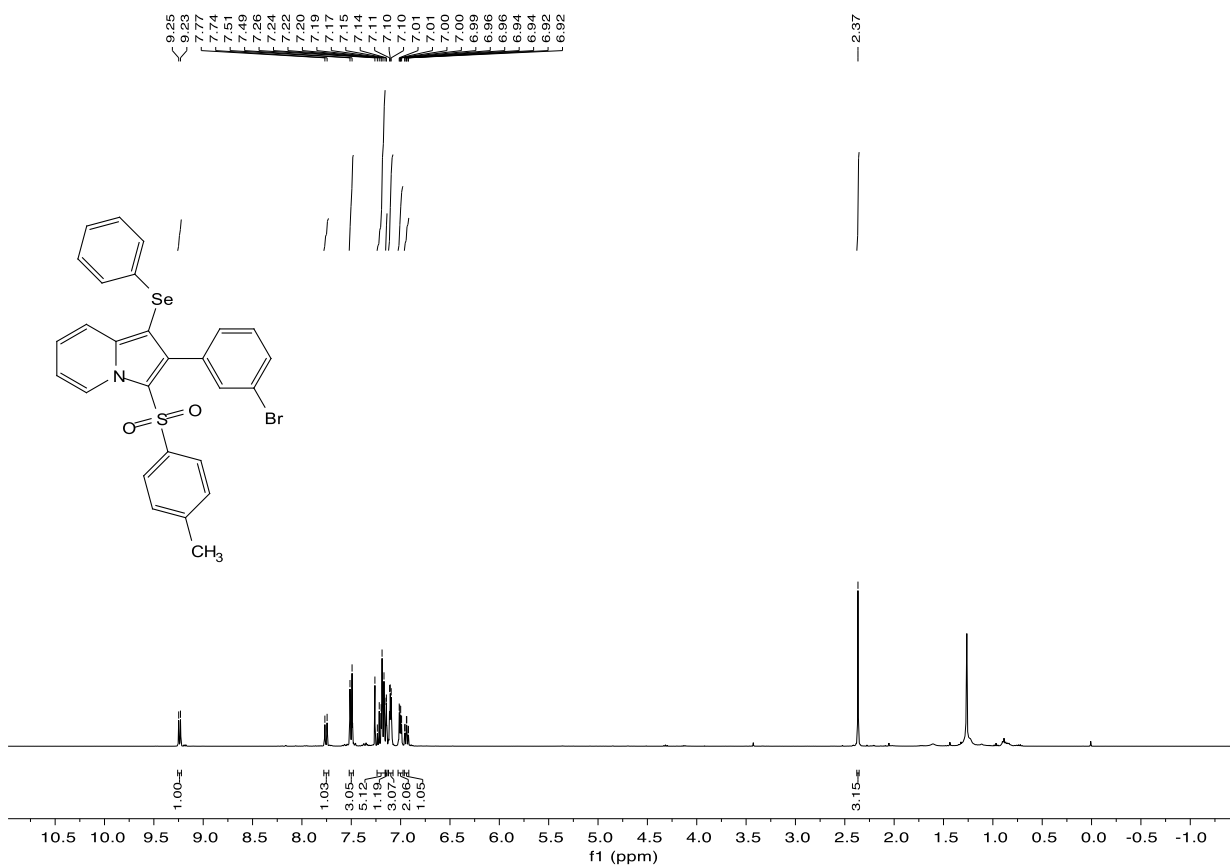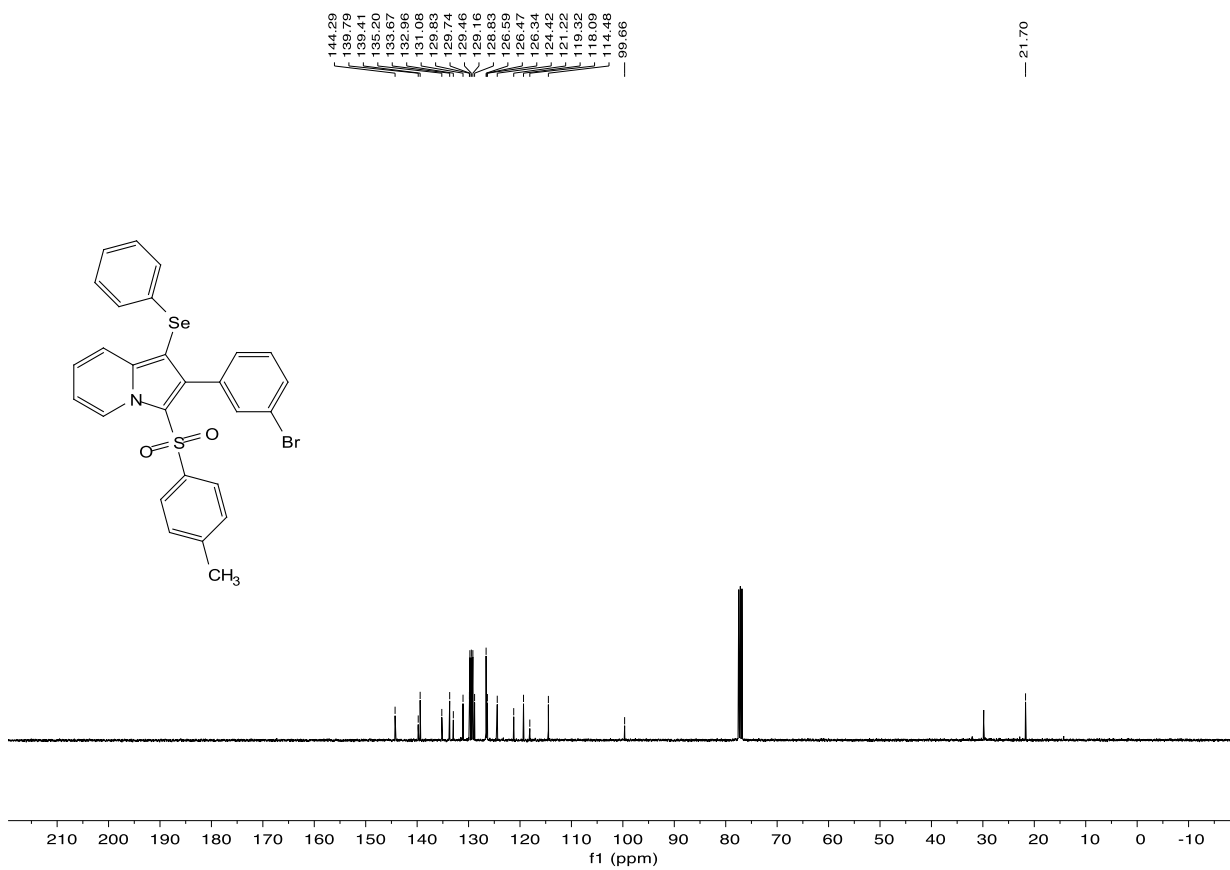

$^1\text{H}$  NMR (400 MHz,  $\text{CDCl}_3$ ),  $^{13}\text{C}$  NMR (100 MHz,  $\text{CDCl}_3$ ) spectrum of compound **7c**

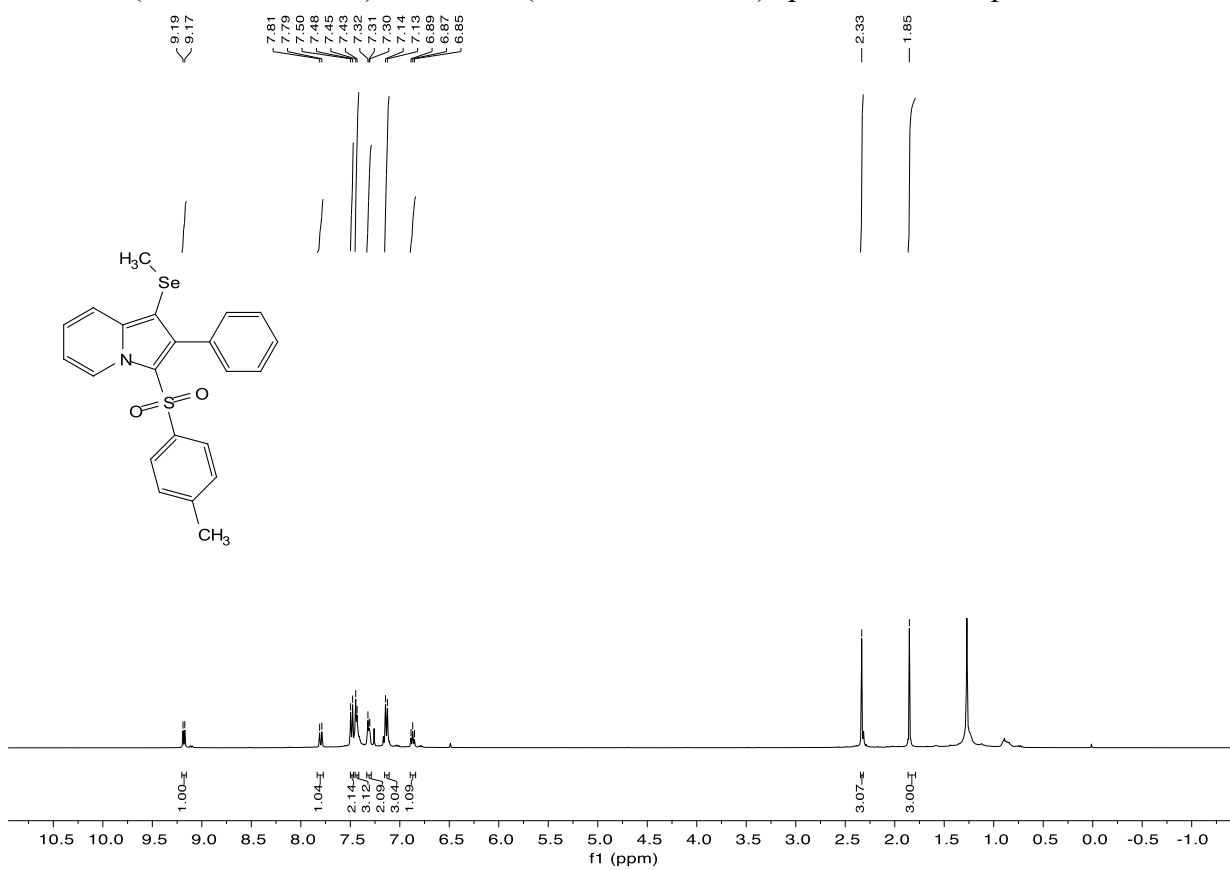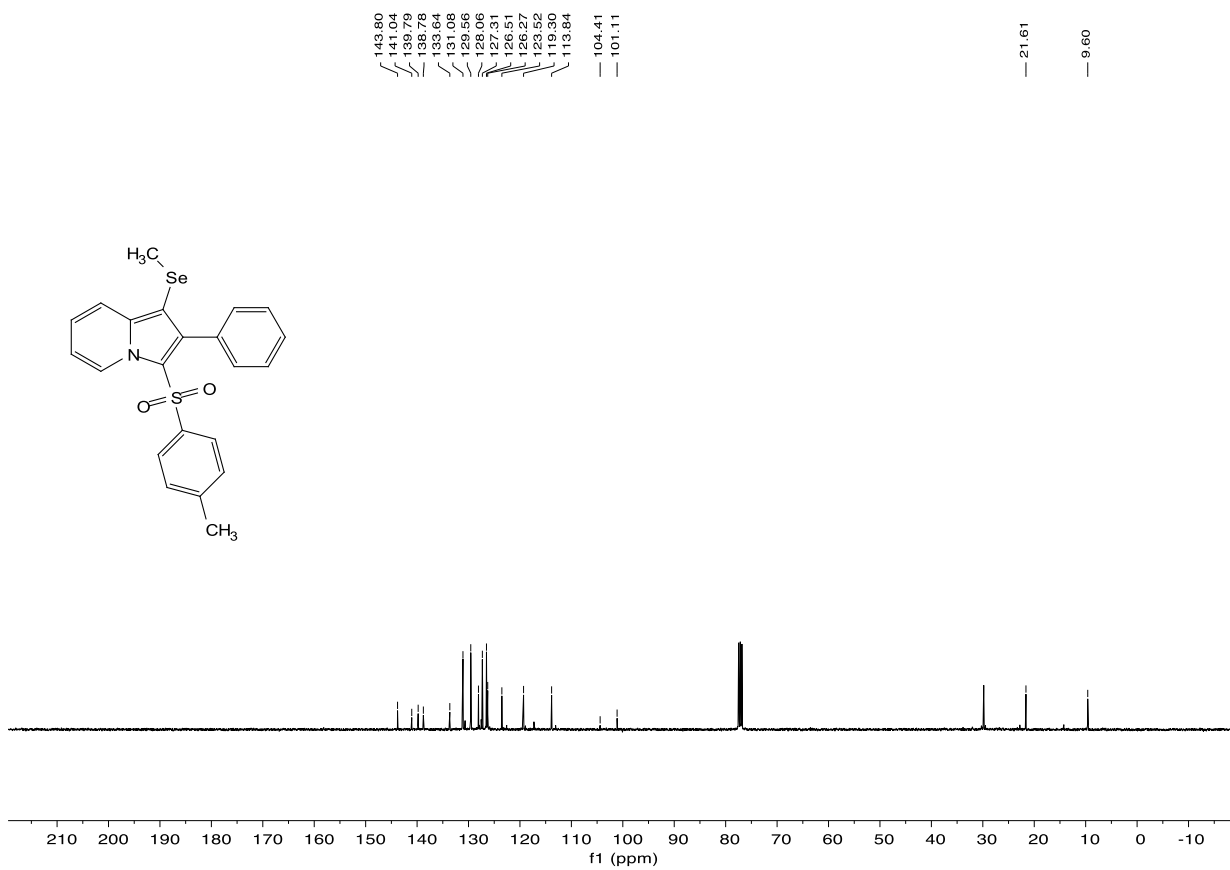

$^1\text{H}$  NMR (400 MHz,  $\text{CDCl}_3$ ),  $^{13}\text{C}$  NMR (100 MHz,  $\text{CDCl}_3$ ) spectrum of compound **7d**

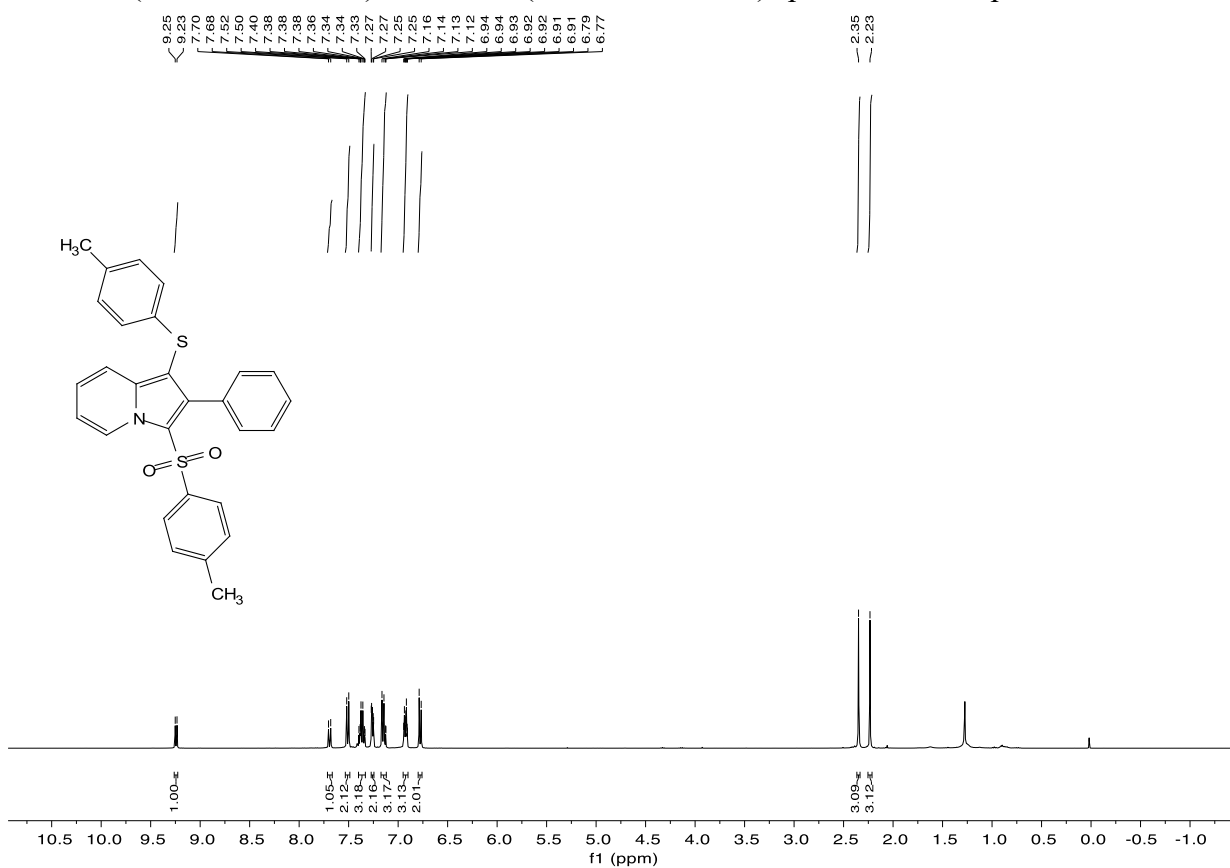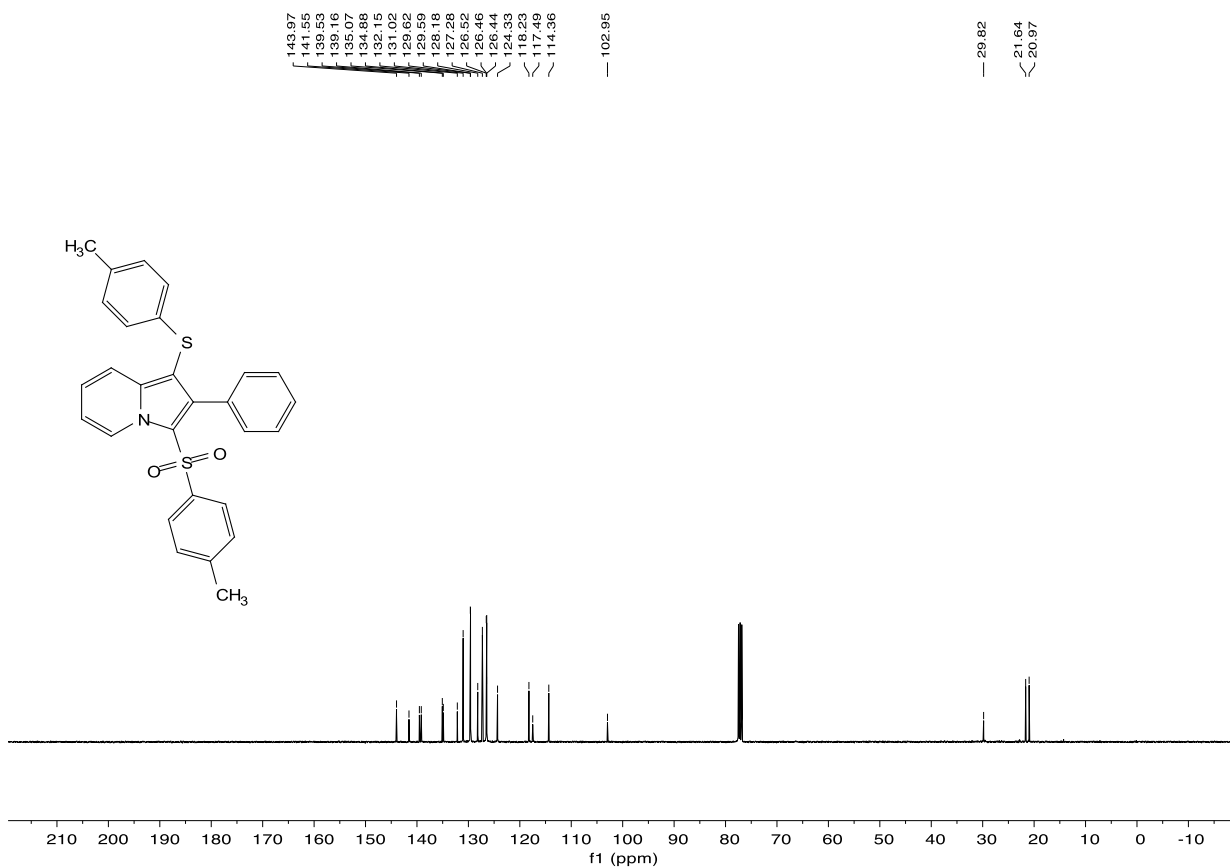

## 4. X-ray crystallographic data

**Figure S1** X-ray single crystal structure of **3i** (displacement ellipsoids are drawn at the 50% probability level)

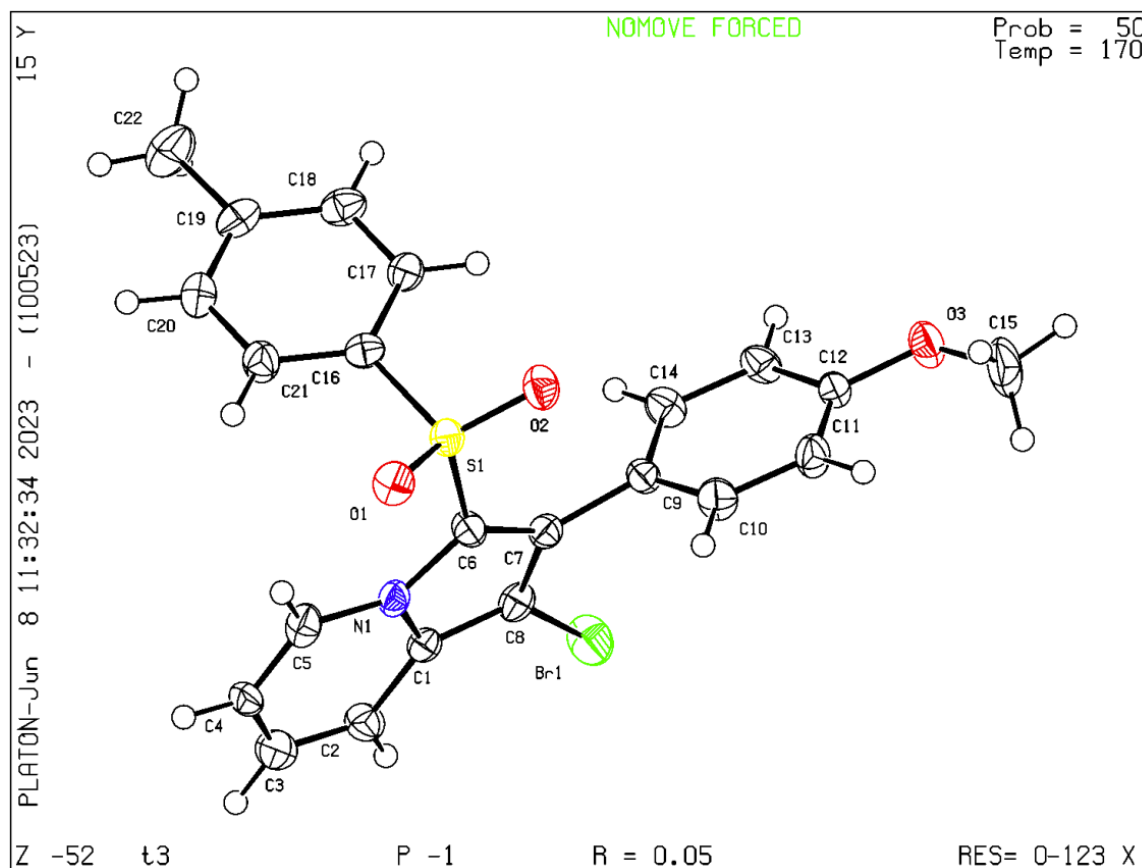

Single crystals of **3i** were grown by slow evaporation of its DCM/PE solution. Supplementary crystallographic data have been deposited at the Cambridge Crystallographic Data Center (CCDC number: 2305723).

**Table S1** Crystal data and structure refinement for **3i**

|                                    |                                                     |
|------------------------------------|-----------------------------------------------------|
| Identification code                | T3                                                  |
| Empirical formula                  | C <sub>22</sub> H <sub>18</sub> BrNO <sub>3</sub> S |
| Formula weight                     | 456.34                                              |
| Temperature/K                      | 170.0(2)                                            |
| Crystal system                     | triclinic                                           |
| Space group                        | P-1                                                 |
| a/Å                                | 9.6263(11)                                          |
| b/Å                                | 10.0825(12)                                         |
| c/Å                                | 10.7578(10)                                         |
| α/°                                | 78.197(9)                                           |
| β/°                                | 80.281(9)                                           |
| γ/°                                | 85.359(10)                                          |
| Volume/Å <sup>3</sup>              | 1006.2(2)                                           |
| Z                                  | 2                                                   |
| ρ <sub>calc</sub> /cm <sup>3</sup> | 1.506                                               |
| μ/mm <sup>-1</sup>                 | 2.169                                               |

|                                                  |                                                                       |
|--------------------------------------------------|-----------------------------------------------------------------------|
| F(000)                                           | 464.0                                                                 |
| Crystal size/mm <sup>3</sup>                     | 0.14 × 0.12 × 0.1                                                     |
| Radiation                                        | Mo K $\alpha$ ( $\lambda$ = 0.71073)                                  |
| 2 $\theta$ range for data collection/ $^{\circ}$ | 3.916 to 49.998                                                       |
| Index ranges                                     | -11 $\leq$ h $\leq$ 11, -11 $\leq$ k $\leq$ 11, -12 $\leq$ l $\leq$ 9 |
| Reflections collected                            | 7103                                                                  |
| Independent reflections                          | 3543 [R <sub>int</sub> = 0.0597, R <sub>sigma</sub> = 0.0778]         |
| Data/restraints/parameters                       | 3543/0/255                                                            |
| Goodness-of-fit on F <sup>2</sup>                | 1.069                                                                 |
| Final R indexes [ $I \geq 2\sigma(I)$ ]          | R <sub>1</sub> = 0.0484, wR <sub>2</sub> = 0.1089                     |
| Final R indexes [all data]                       | R <sub>1</sub> = 0.0623, wR <sub>2</sub> = 0.1204                     |
| Largest diff. peak/hole / e $\text{\AA}^{-3}$    | 0.71/-0.44                                                            |

**Table S2** Bond Lengths for **3i**

| Atom | Atom | Length/ $\text{\AA}$ | Atom | Atom | Length/ $\text{\AA}$ |
|------|------|----------------------|------|------|----------------------|
| Br1  | C8   | 1.873(4)             | C7   | C8   | 1.400(5)             |
| S1   | O1   | 1.435(3)             | C7   | C9   | 1.480(5)             |
| S1   | O2   | 1.425(2)             | C9   | C10  | 1.378(5)             |
| S1   | C6   | 1.727(4)             | C9   | C14  | 1.384(5)             |
| S1   | C16  | 1.757(4)             | C10  | C11  | 1.381(5)             |
| O3   | C12  | 1.367(4)             | C11  | C12  | 1.377(5)             |
| O3   | C15  | 1.432(5)             | C12  | C13  | 1.369(5)             |
| N1   | C1   | 1.389(5)             | C13  | C14  | 1.384(5)             |
| N1   | C5   | 1.385(5)             | C16  | C17  | 1.395(5)             |
| N1   | C6   | 1.404(4)             | C16  | C21  | 1.377(5)             |
| C1   | C2   | 1.398(5)             | C17  | C18  | 1.365(5)             |
| C1   | C8   | 1.383(5)             | C18  | C19  | 1.393(6)             |
| C2   | C3   | 1.360(6)             | C19  | C20  | 1.391(6)             |
| C3   | C4   | 1.401(6)             | C19  | C22  | 1.495(6)             |
| C4   | C5   | 1.354(5)             | C20  | C21  | 1.384(6)             |
| C6   | C7   | 1.390(5)             |      |      |                      |

**Table S3** Bond Angles for **3i**

| Atom | Atom | Atom | Angle/ $^{\circ}$ | Atom | Atom | Atom | Angle/ $^{\circ}$ |
|------|------|------|-------------------|------|------|------|-------------------|
| O1   | S1   | C6   | 108.64(16)        | C1   | C8   | Br1  | 123.1(3)          |
| O1   | S1   | C16  | 107.88(17)        | C1   | C8   | C7   | 110.1(3)          |
| O2   | S1   | O1   | 119.39(15)        | C7   | C8   | Br1  | 126.8(3)          |
| O2   | S1   | C6   | 107.24(17)        | C10  | C9   | C7   | 119.8(3)          |
| O2   | S1   | C16  | 108.29(16)        | C10  | C9   | C14  | 118.8(3)          |
| C6   | S1   | C16  | 104.42(18)        | C14  | C9   | C7   | 121.2(3)          |
| C12  | O3   | C15  | 116.8(3)          | C9   | C10  | C11  | 120.8(3)          |
| C1   | N1   | C6   | 109.2(3)          | C12  | C11  | C10  | 119.9(4)          |
| C5   | N1   | C1   | 120.4(3)          | O3   | C12  | C11  | 124.7(3)          |
| C5   | N1   | C6   | 130.5(3)          | O3   | C12  | C13  | 115.3(3)          |
| N1   | C1   | C2   | 119.4(3)          | C13  | C12  | C11  | 120.0(3)          |
| C8   | C1   | N1   | 106.4(3)          | C12  | C13  | C14  | 120.1(3)          |
| C8   | C1   | C2   | 134.2(4)          | C13  | C14  | C9   | 120.4(4)          |
| C3   | C2   | C1   | 120.4(4)          | C17  | C16  | S1   | 118.9(3)          |
| C2   | C3   | C4   | 118.9(4)          | C21  | C16  | S1   | 121.0(3)          |
| C5   | C4   | C3   | 122.0(4)          | C21  | C16  | C17  | 120.0(4)          |



| Atom | Atom | Atom | Angle/°  | Atom | Atom | Atom | Angle/°  |
|------|------|------|----------|------|------|------|----------|
| C4   | C5   | N1   | 119.0(4) | C18  | C17  | C16  | 120.1(4) |
| N1   | C6   | S1   | 122.4(3) | C17  | C18  | C19  | 121.0(4) |
| C7   | C6   | S1   | 127.9(3) | C18  | C19  | C22  | 120.9(4) |
| C7   | C6   | N1   | 107.6(3) | C20  | C19  | C18  | 118.2(4) |
| C6   | C7   | C8   | 106.8(3) | C20  | C19  | C22  | 120.9(4) |
| C6   | C7   | C9   | 129.6(3) | C21  | C20  | C19  | 121.2(4) |
| C8   | C7   | C9   | 123.6(3) | C16  | C21  | C20  | 119.4(3) |

## 5. References

- (a) L. Teng, X. Liu, P. Guo, Y. Yu and H. Cao, *Org. Lett.*, 2020, **22**, 3841-3845; (b) J. Zhou, X. Shi, H. Zheng, G. Chen, C. Zhang, X. Liu and H. Cao, *Org. Lett.*, 2022, **24**, 3238-3243.
- W. Kim, H. Y. Kim and K. Oh, *J. Org. Chem.*, 2021, **86**, 15973-15991.
